# Supplementary material for: The significance of phosphoniocarbynes in halocarbyne cross-coupling reactions
Source: Royal Society of Chemistry journal article supplement (doi:10.1039/d0cc02070b), 2020-01-01
Supplement: d0cc02070b2.pdf [file d0cc02070b2.pdf]

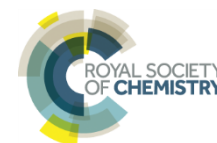

## Chemical Communications

### ELECTRONIC SUPPORTING INFORMATION

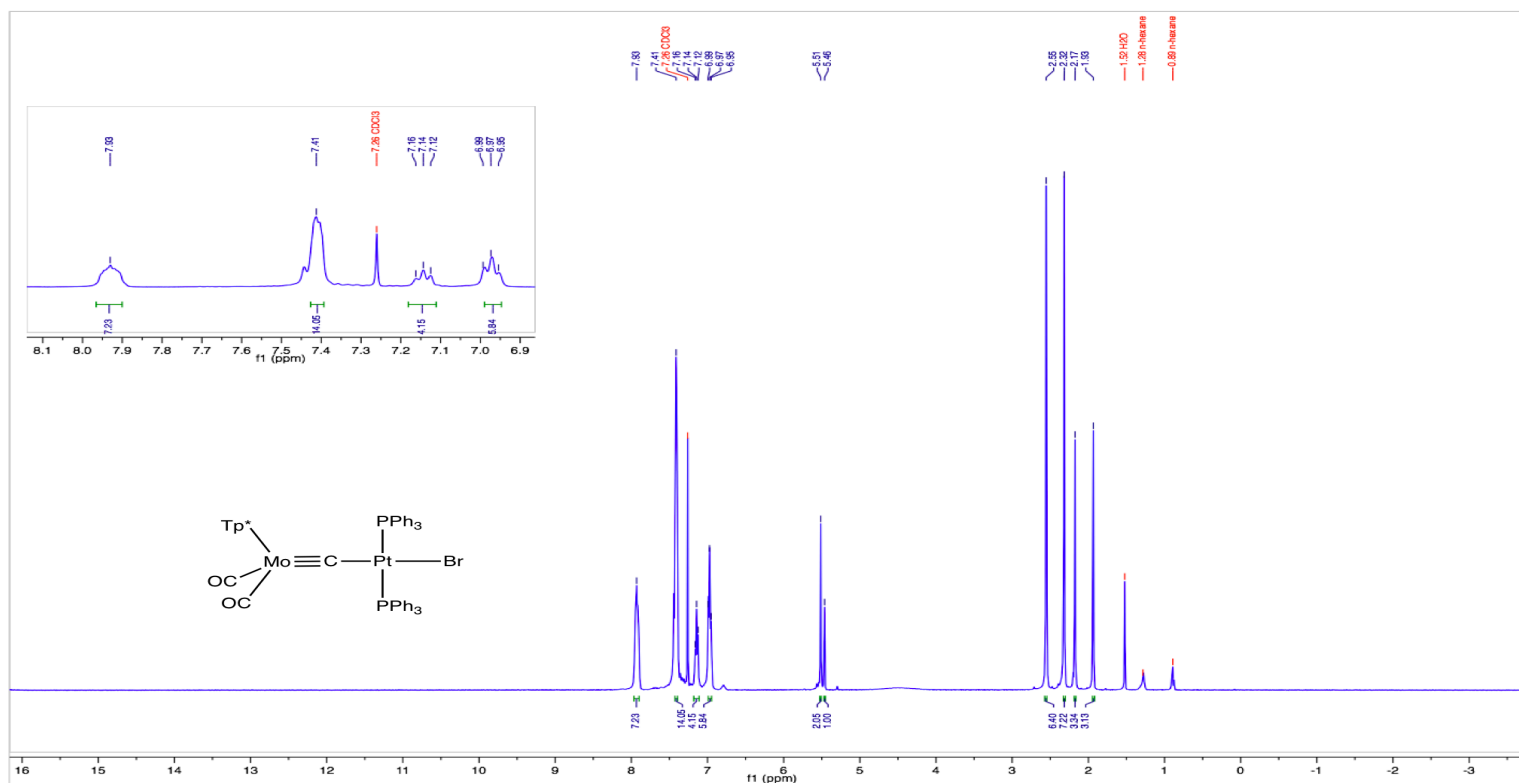

Figure S6.  $^1\text{H}$  NMR Spectrum of  $[\text{MoPt}(\mu\text{-C})(\text{CO})_2(\text{PPh}_3)_2(\text{Tp}^*)]$  (2a) in  $\text{CDCl}_3$ ,  $25^\circ\text{C}$

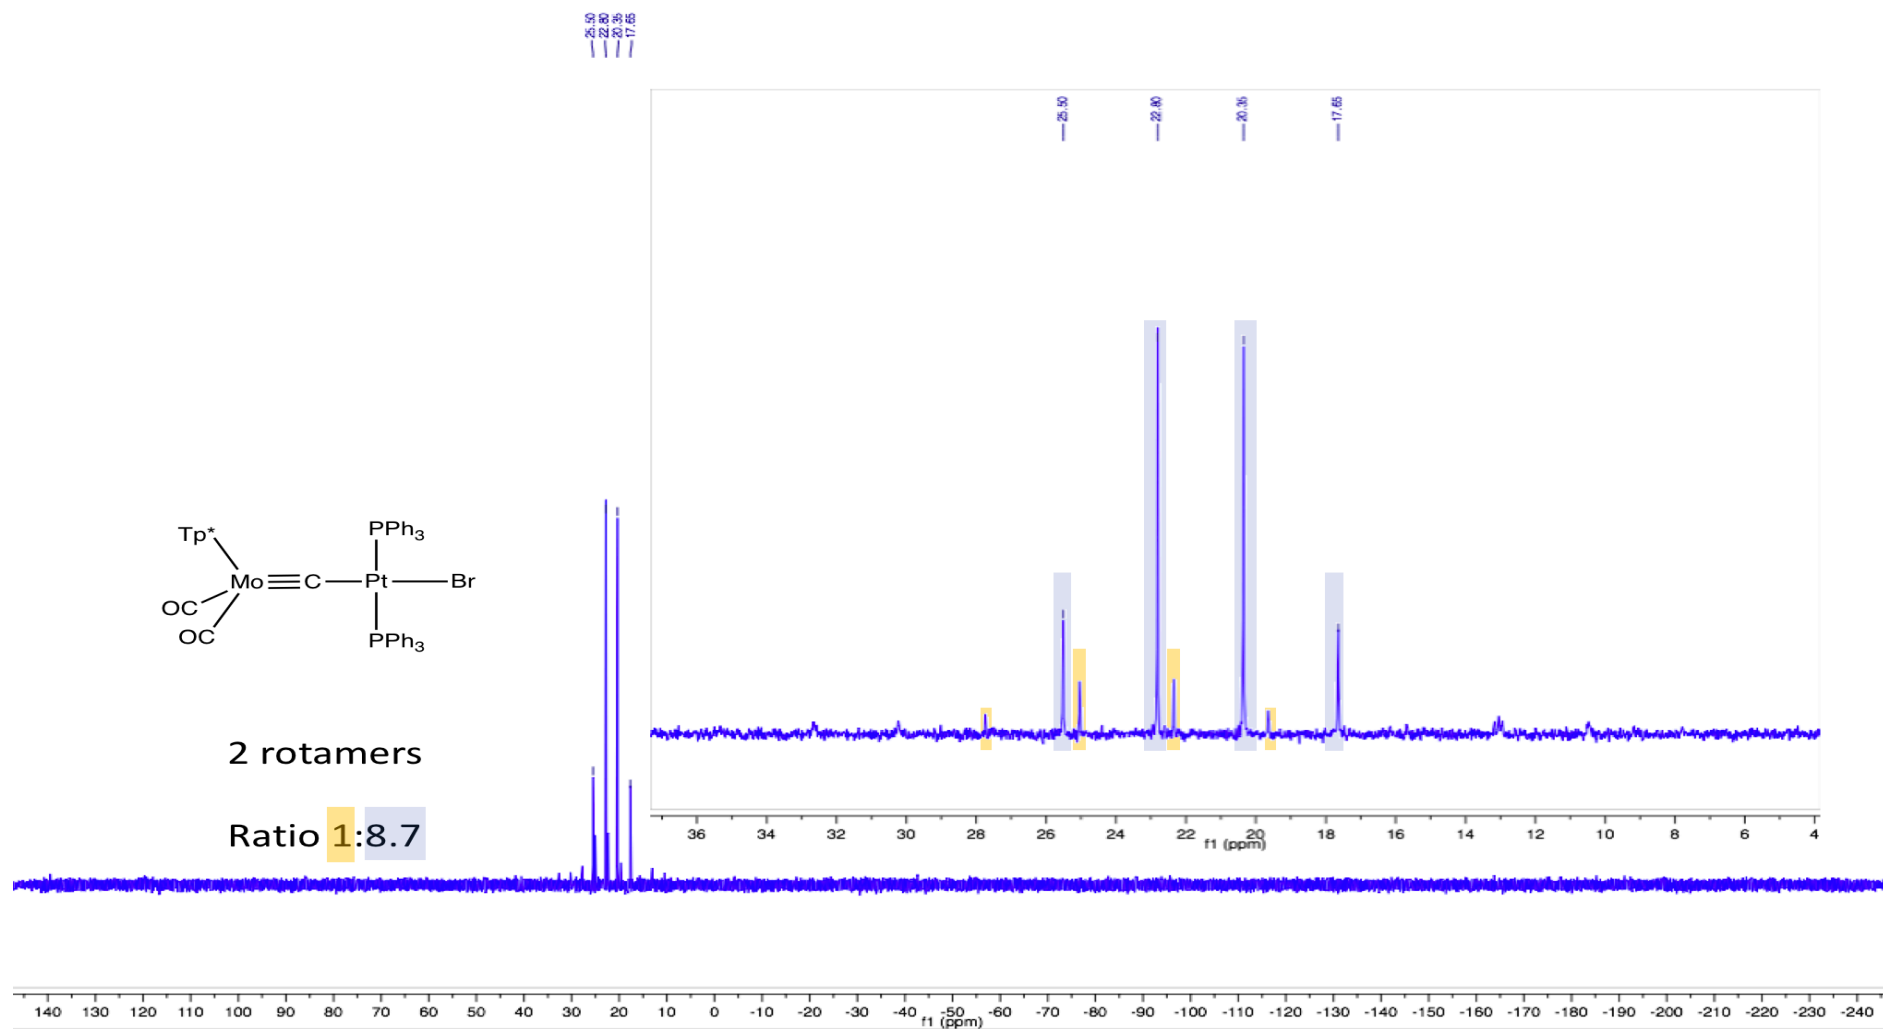

Figure S7.  $^{31}\text{P}\{^1\text{H}\}$  NMR Spectrum of  $[\text{MoPt}(\mu\text{-C})(\text{CO})_2(\text{PPh}_3)_2(\text{Tp}^*)]$  (2a) in  $\text{CDCl}_3$ , 25 °C

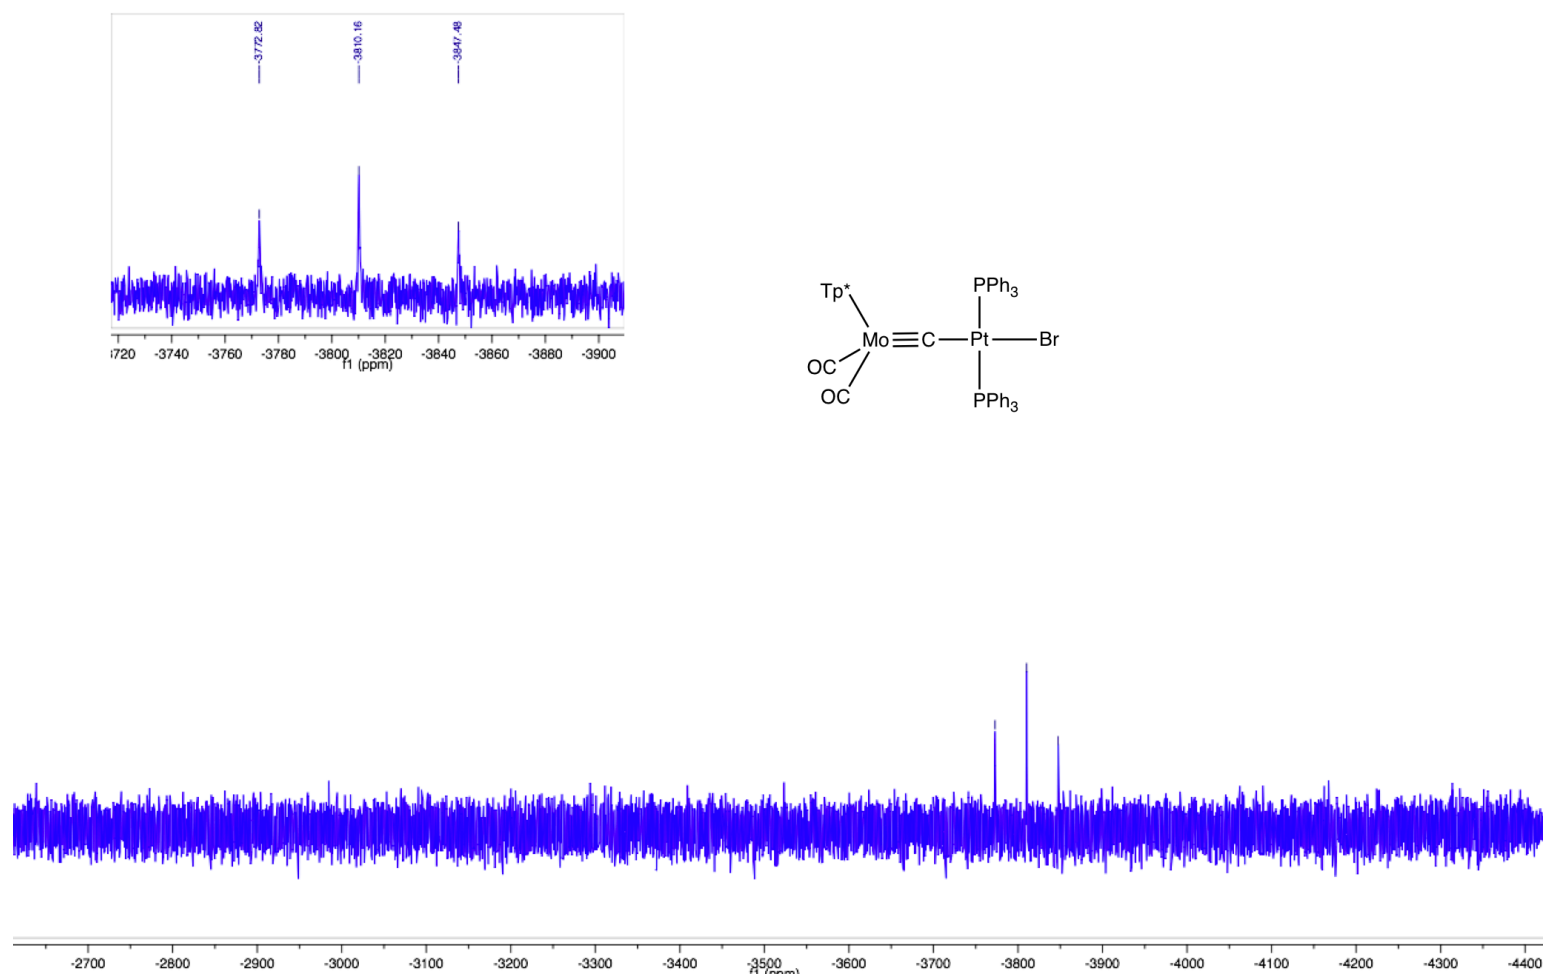

Figure S8.  $^{195}\text{Pt}\{^1\text{H}\}$  NMR Spectrum of  $[\text{MoPt}(\mu\text{-C})(\text{CO})_2(\text{PPh}_3)_2(\text{Tp}^*)]$  (2a) in  $\text{CDCl}_3$ ,  $25^\circ\text{C}$

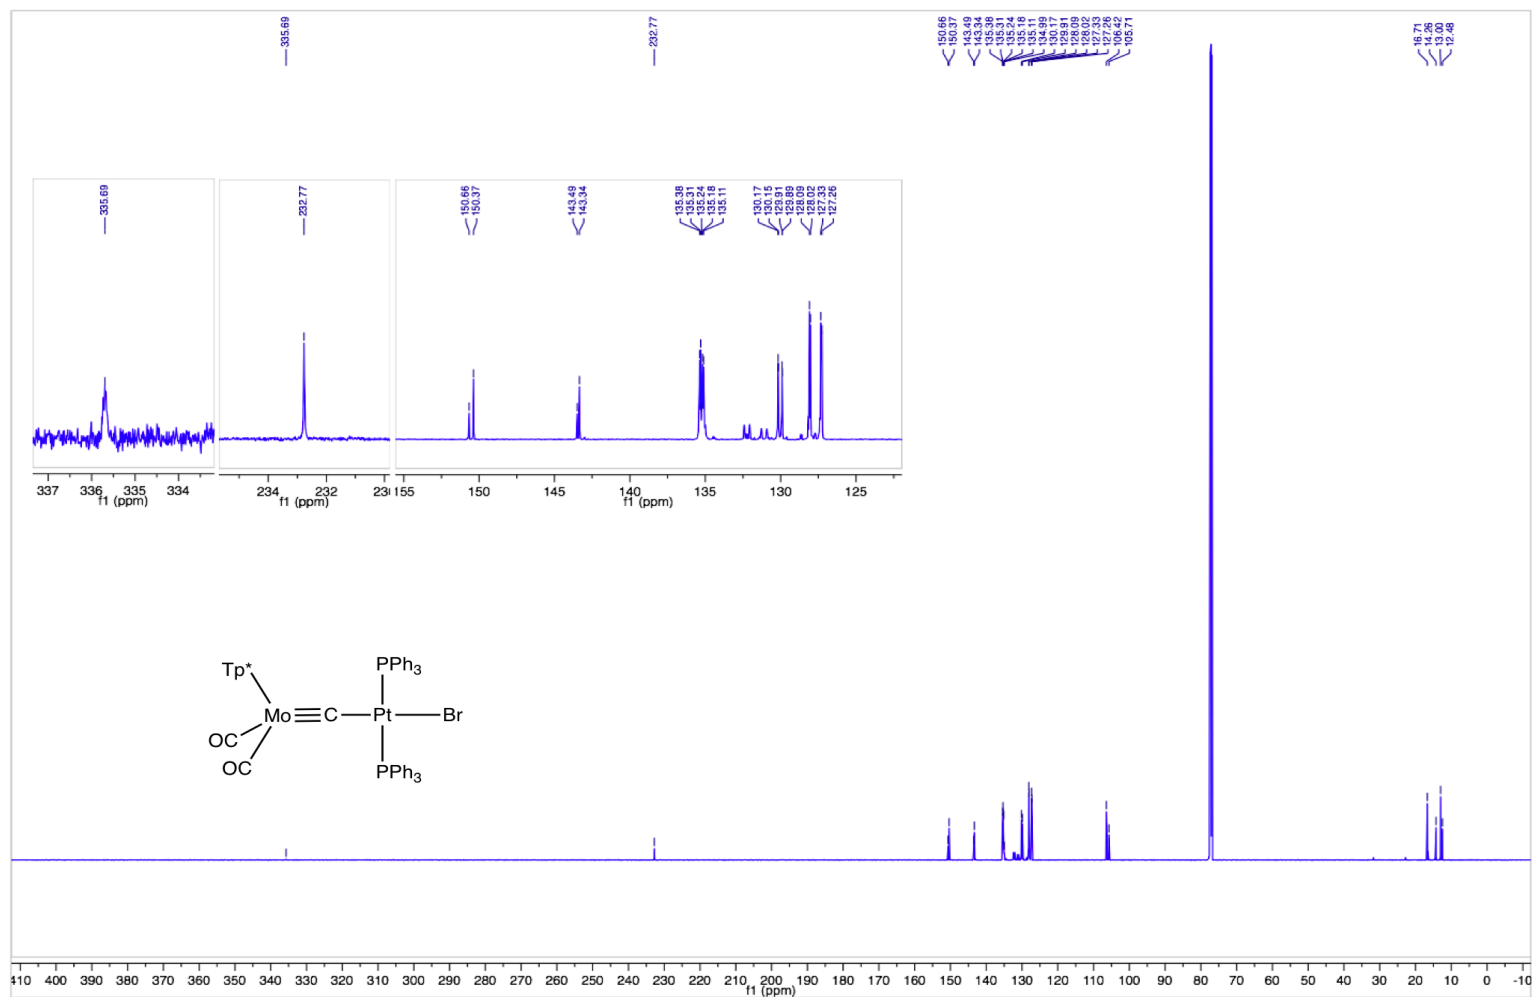

Figure S9.  $^{13}\text{C}\{^1\text{H}\}$  NMR Spectrum of  $[\text{MoPt}(\mu\text{-C})(\text{CO})_2(\text{PPh}_3)_2(\text{Tp}^*)]$  (2a) in  $\text{CDCl}_3$ , 25 °C



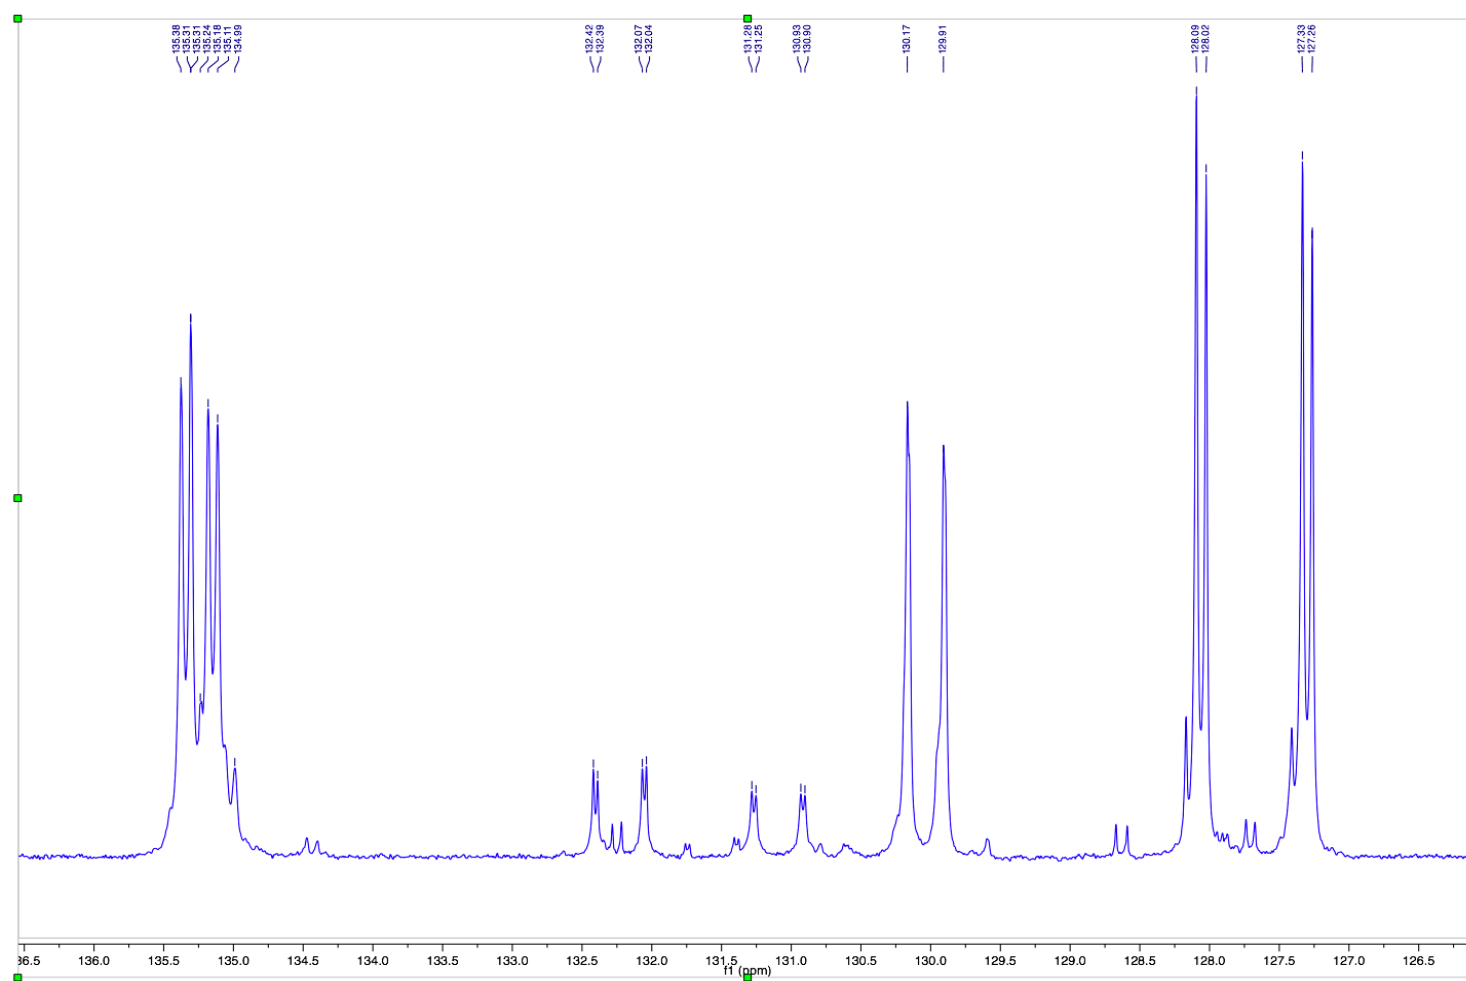

Figure S10.  $^{13}\text{C}\{^1\text{H}\}$  NMR Spectrum of  $[\text{MoPt}(\mu\text{-C})(\text{CO})_2(\text{PPh}_3)_2(\text{Tp}^*)]$  (2a) in  $\text{CDCl}_3$ ,  $25^\circ\text{C}$  – Phenyl region

**Figure S10. RSC/RSB Joint Mass Spectrometry Facility Analysis Report: [MoPt( $\mu$ -C)(CO)<sub>2</sub>(PPh<sub>3</sub>)<sub>2</sub>(Tp\*)] (2a)**

**Instrument:** Orbitrap QE, +ve mode ESI at 280k resolution **Analysis Date:** 2019-08-15

**Theoretical m/z (most abundant isotopologue): [M+H]<sup>+</sup> ion: 1262.16823 Observed m/z (most abundant isotopologue): [M+H]<sup>+</sup> ion: 1262.16794 Mass error: 0.111 ppm**

**Observed versus simulated spectrum for detected target formulas [M+H]<sup>+</sup> ion**

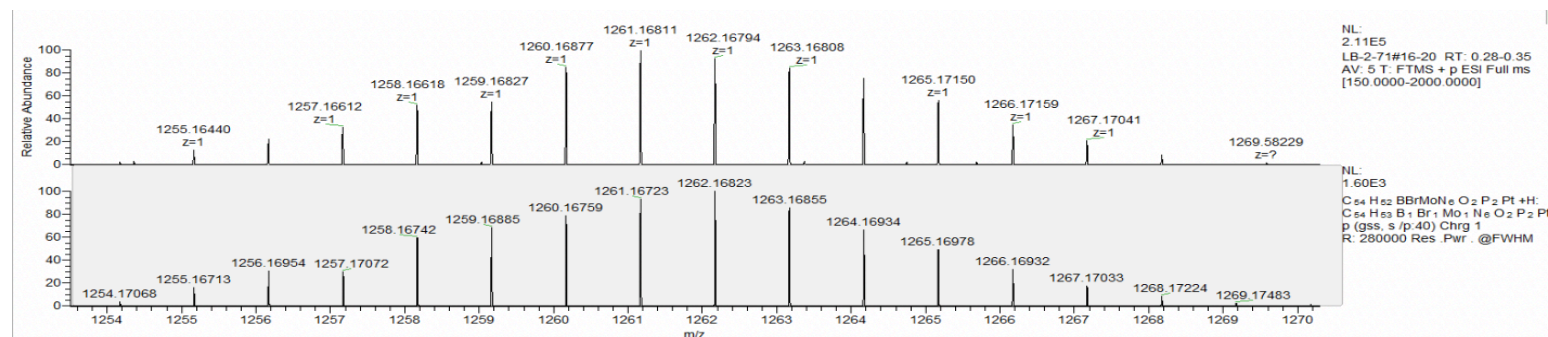

**Full Spectrum (m/z = 1181.24429 = [M-Br]<sup>+</sup>):**

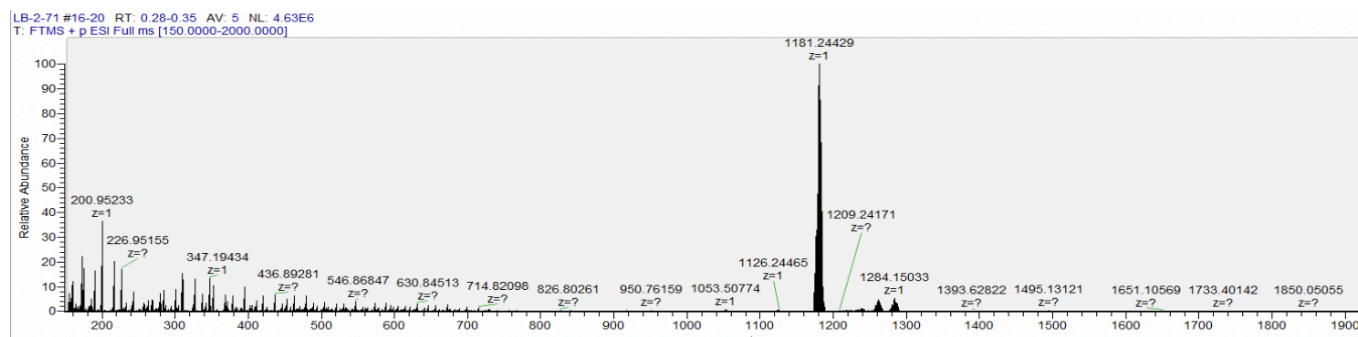

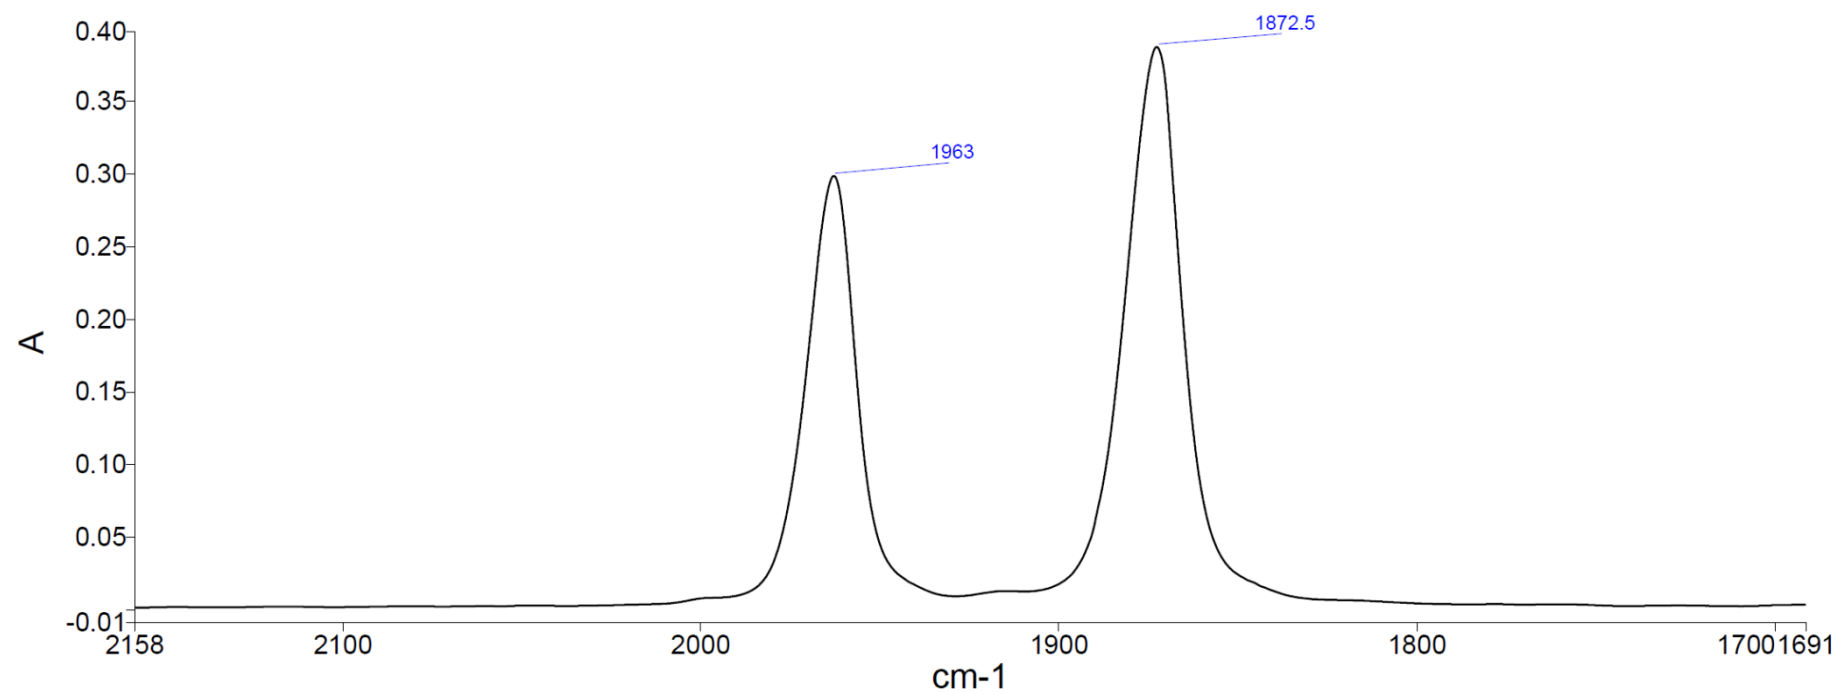

Figure S11. Infrared Spectrum of  $[\text{MoPt}(\mu\text{-C})(\text{CO})_2(\text{PPh}_3)_2(\text{Tp}^*)]$  (2a) ( $\text{CH}_2\text{Cl}_2$ , 25 °C).

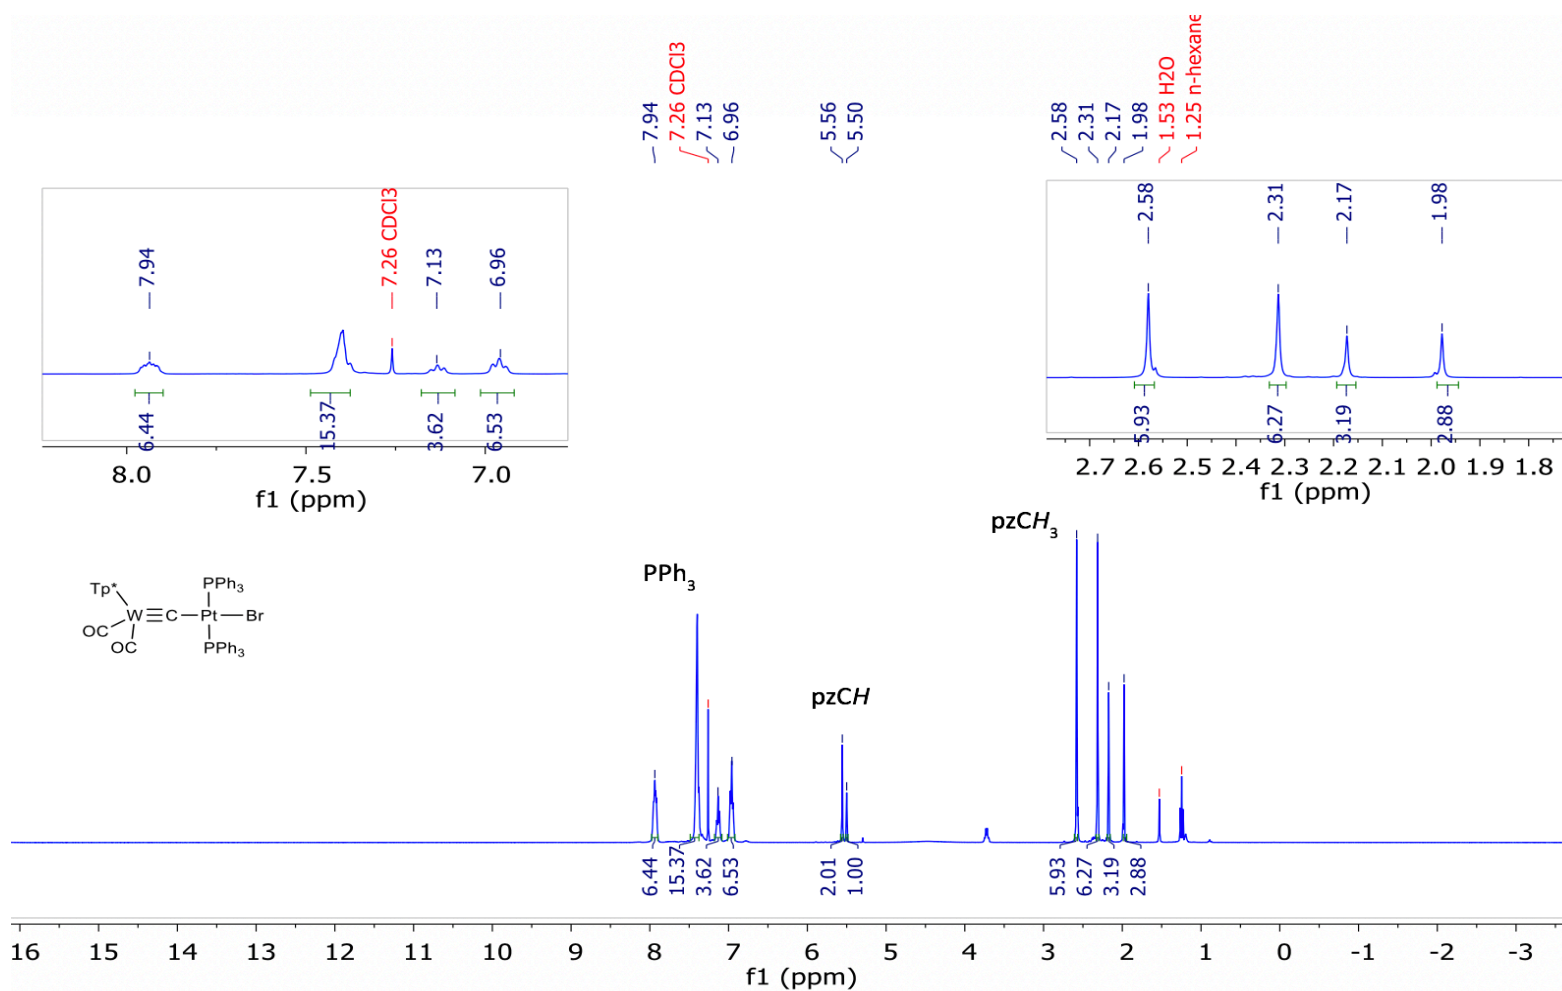

Figure S12.  $^1\text{H}$  NMR Spectrum of  $[\text{WPt}(\mu\text{-C})(\text{CO})_2(\text{PPh}_3)_2(\text{Tp}^*)]$  (2b) (400 MHz,  $\text{CDCl}_3$ , 25 °C)

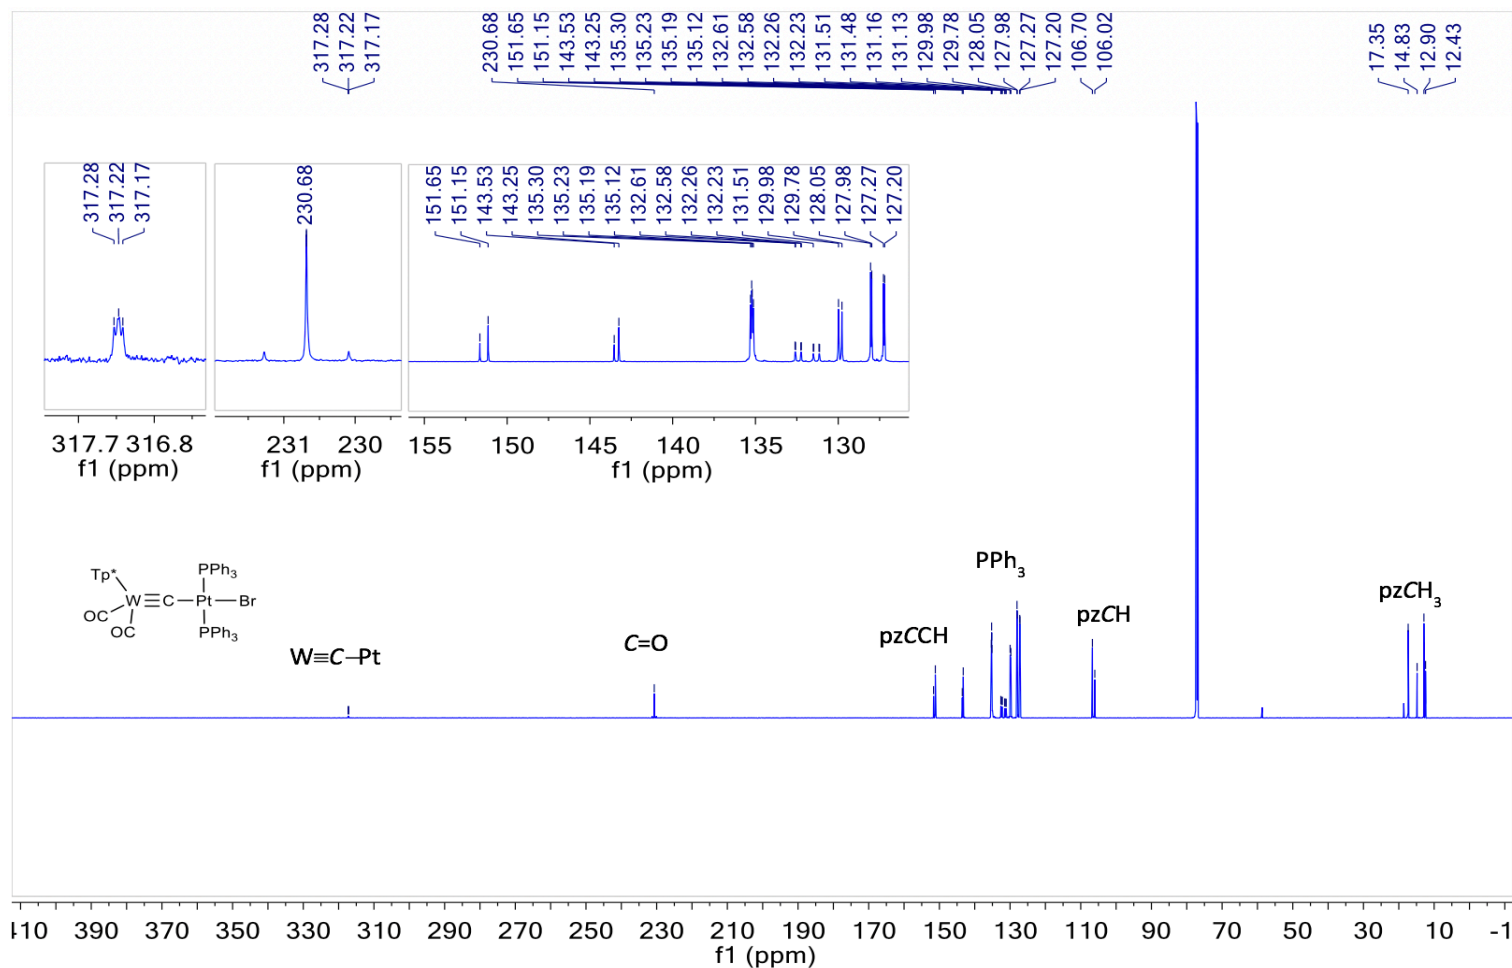

Figure S13.  $^{13}C\{^1H\}$  NMR Spectrum of  $[WPt(\mu-C)(CO)_2(PPh_3)_2(Tp^*)]$  (2b) (151 MHz,  $CDCl_3$ , 25 °C)

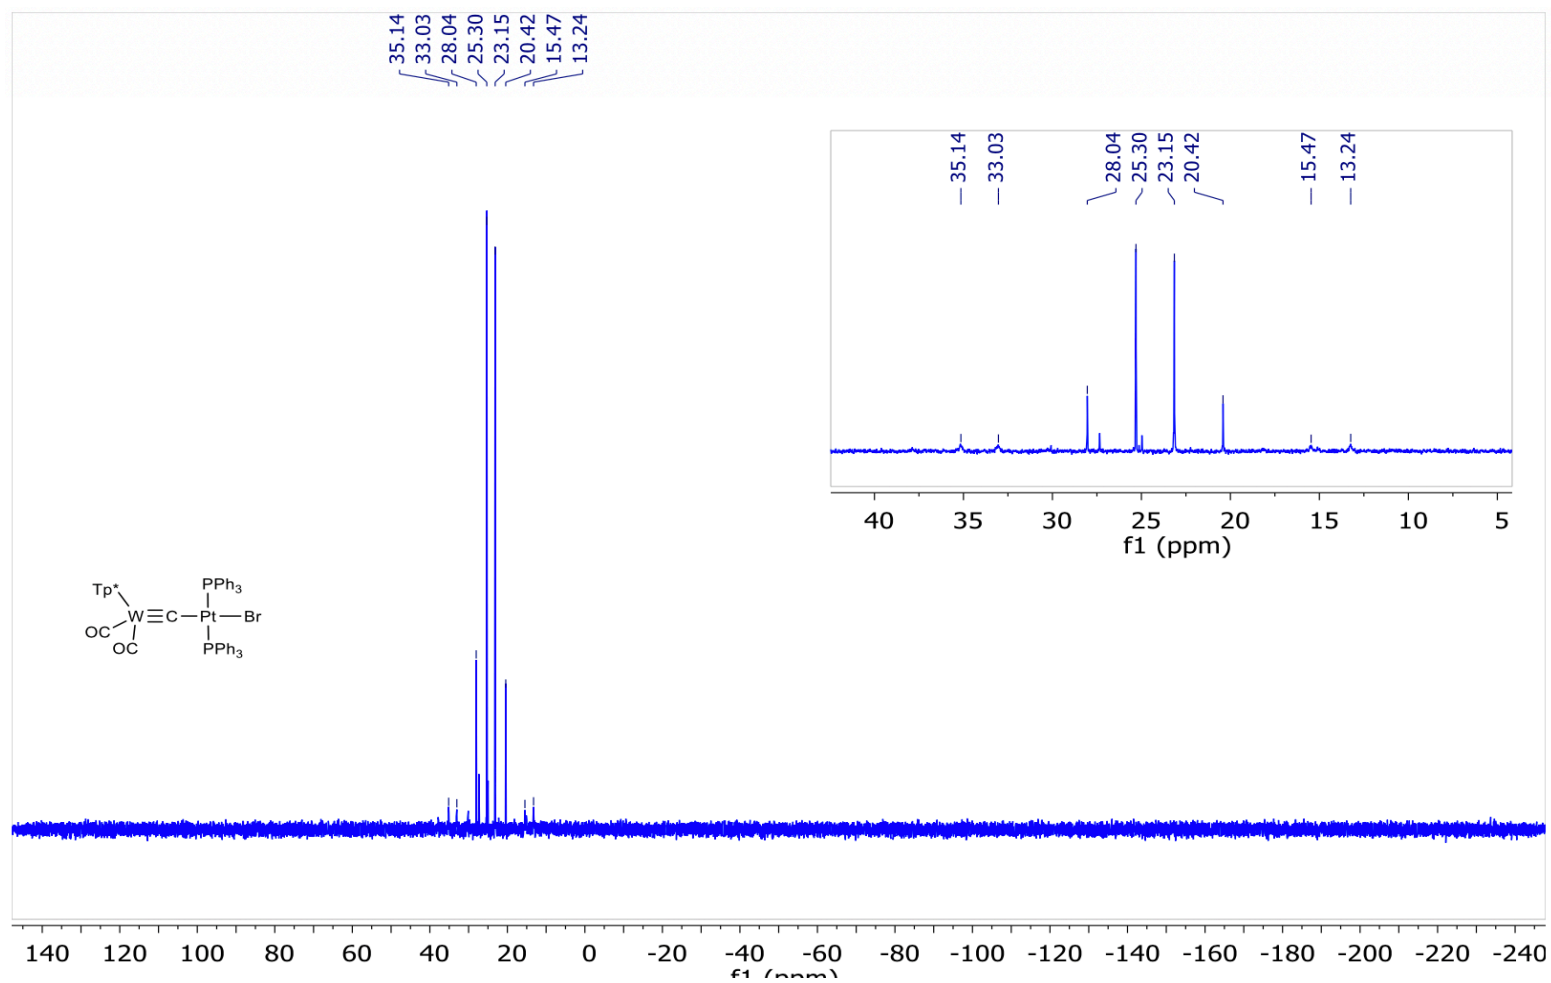

Figure S14.  $^{31}\text{P}\{^1\text{H}\}$  NMR Spectrum of  $[\text{WPt}(\mu\text{-C})(\text{CO})_2(\text{PPh}_3)_2(\text{Tp}^*)]$  (2b) (162 MHz,  $\text{CDCl}_3$ , 25 °C)

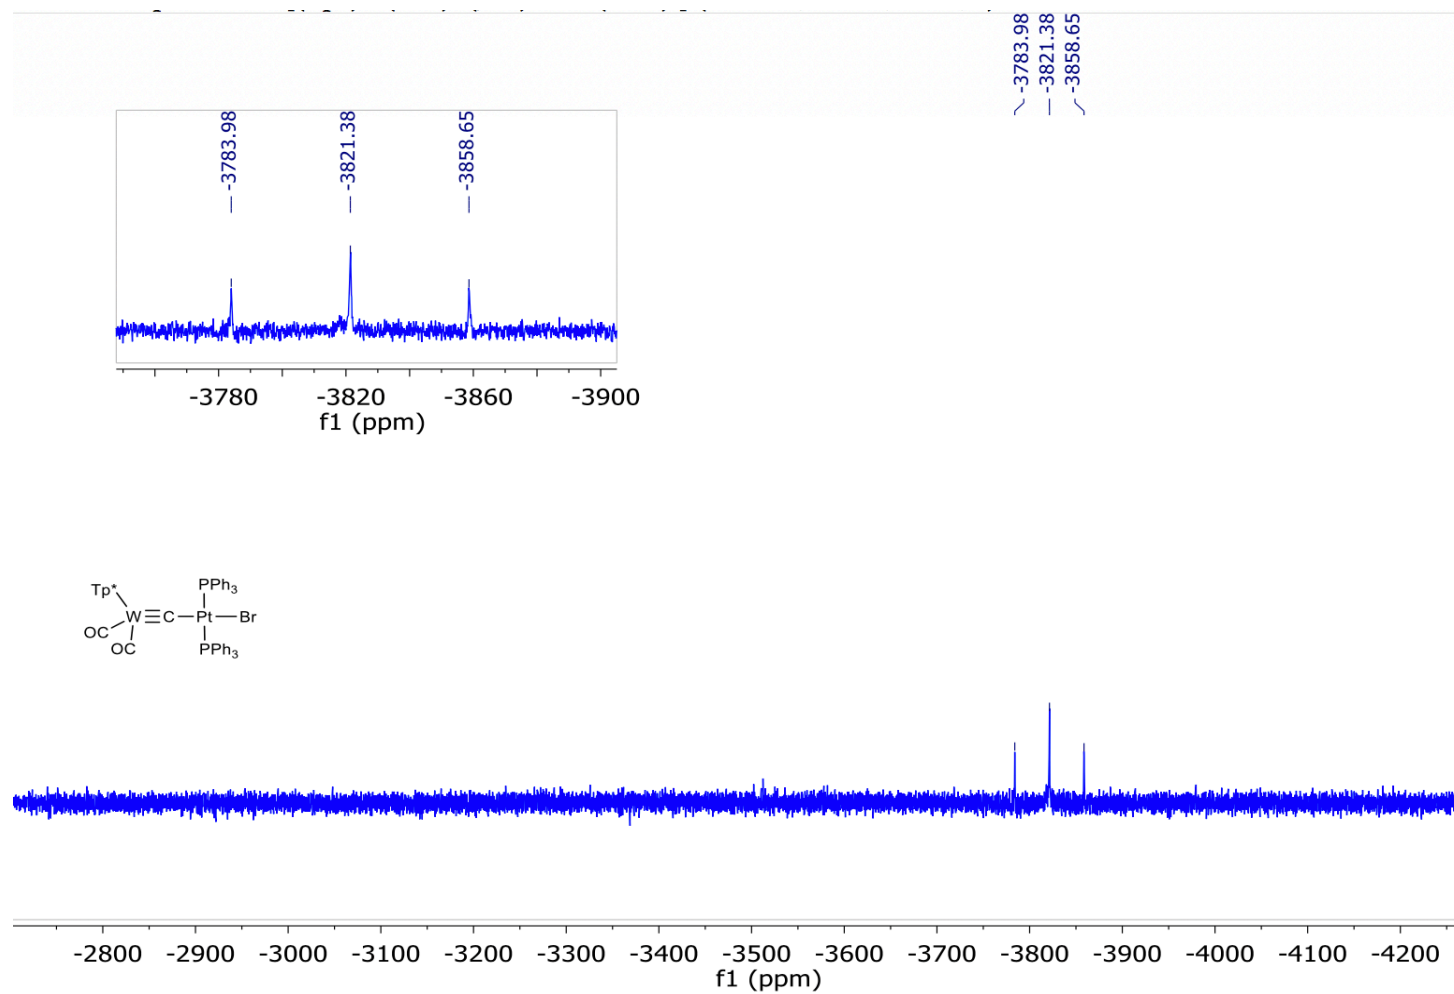

Figure S15.  $^{195}\text{Pt}\{^1\text{H}\}$  NMR Spectrum of  $[\text{WPt}(\mu\text{-C})(\text{CO})_2(\text{PPh}_3)_2(\text{Tp}^*)]$  (2b) (86 MHz,  $\text{CDCl}_3$ , 25 °C)

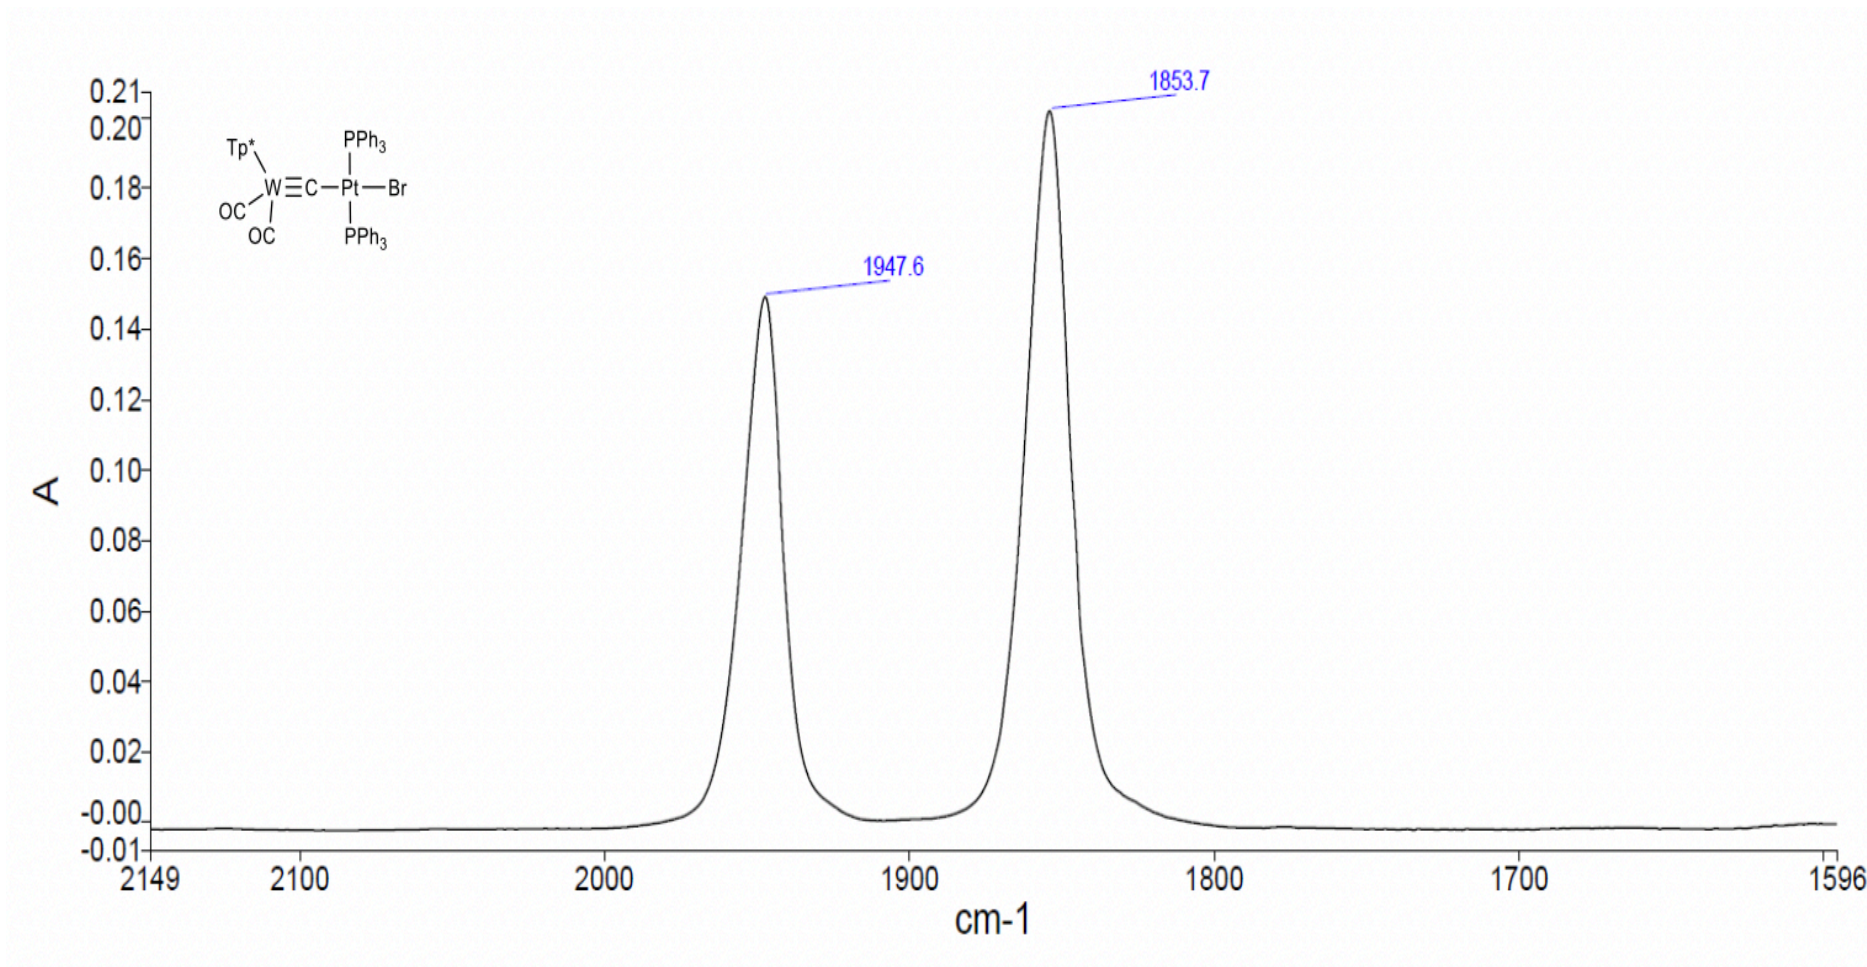

Figure S16. Infrared Spectrum of  $[WPt(\mu-C)(CO)_2(PPh_3)_2(Tp^*)]$  (2b) ( $CH_2Cl_2$ , 25 °C).



## Figure S17. RSC/RSB Joint Mass Spectrometry Facility Analysis Report

**Analyst:** Anitha Jeyasingham    **Instrument:** Orbitrap QE, +ve mode ESI at 280k resolution    **Analysis Date:** 2019-08-15    **Sample code:** LB-2-83

**Theoretical m/z (most abundant isotopologue):** [M]<sup>+</sup> ion: 1347.20534    **Observed m/z (most abundant isotopologue):** [M]<sup>+</sup> ion: 1347.20589    **Mass error:** 0.290 ppm

Observed versus simulated spectrum for detected target formulas [M]<sup>+</sup> ion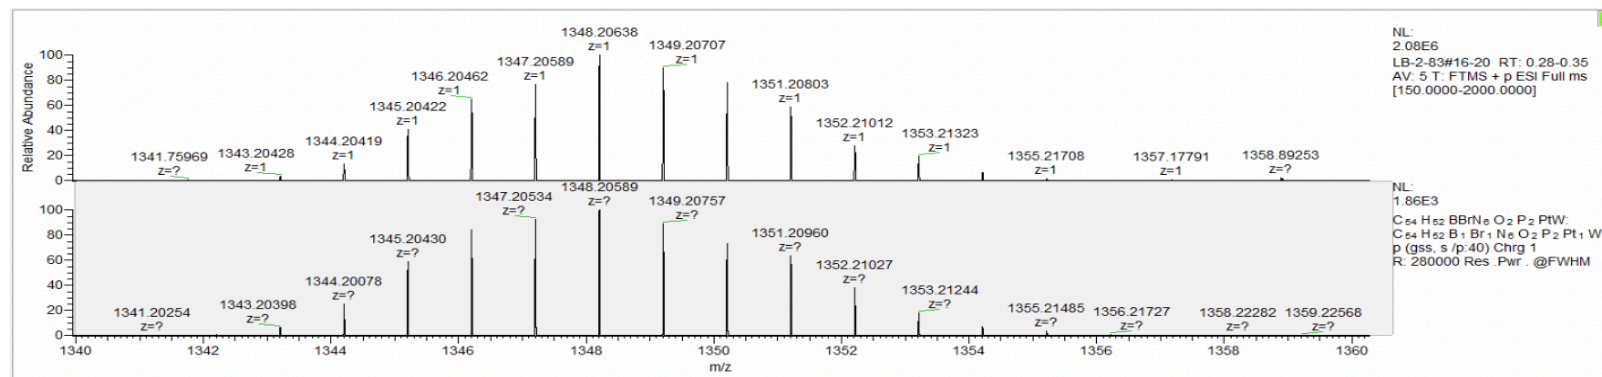

## Full Spectrum

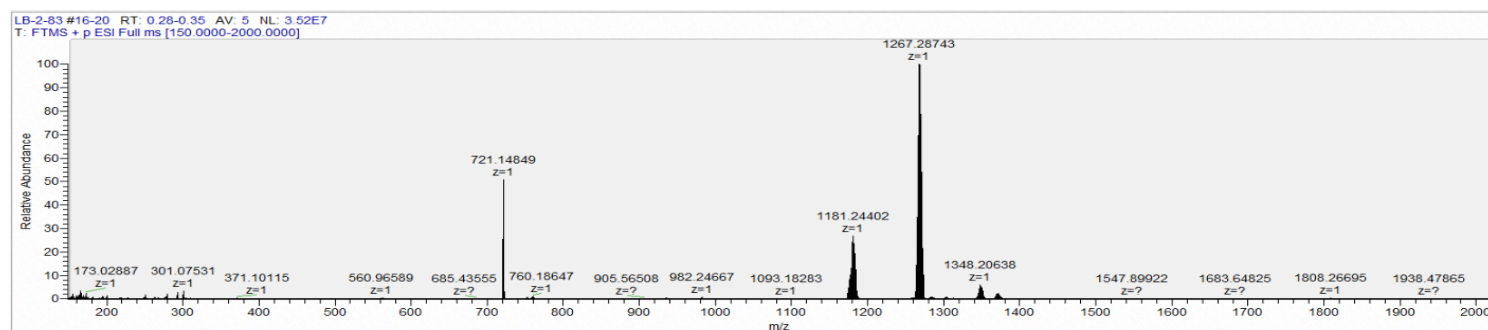

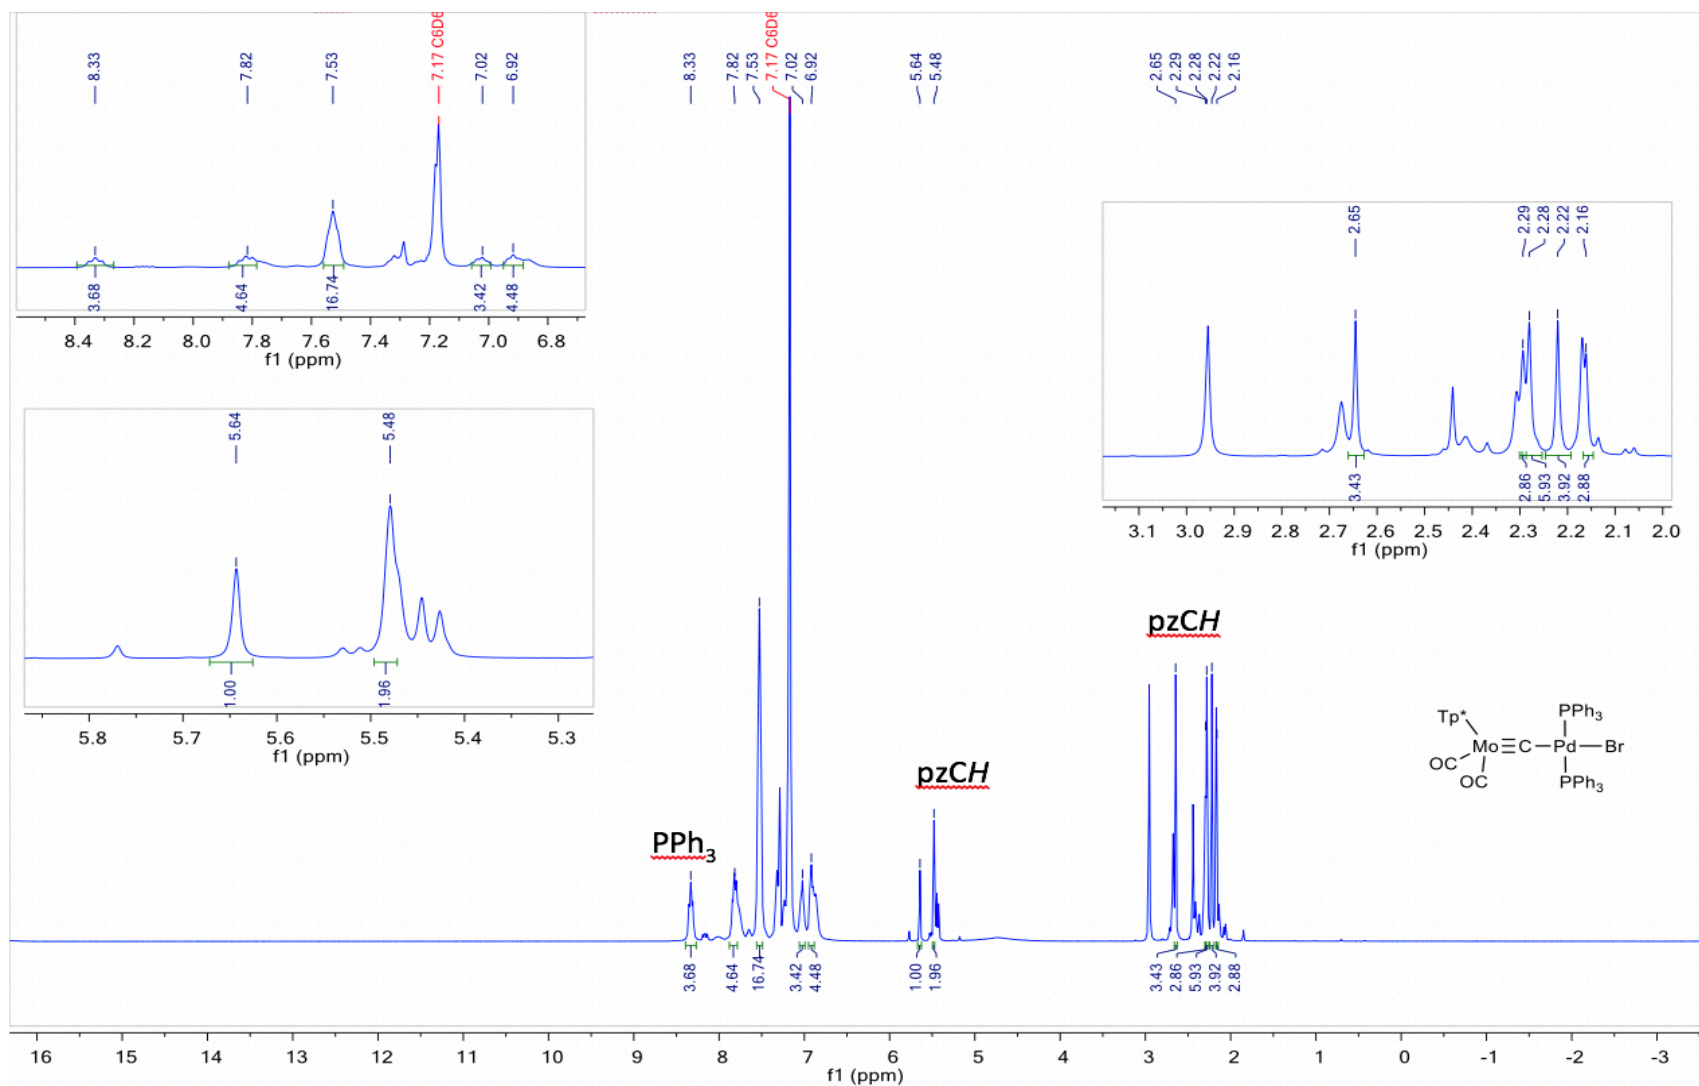

Figure S18.  $^1\text{H}$  NMR Spectrum of  $[\text{MoPd}(\mu\text{-C})(\text{CO})_2(\text{PPh}_3)_2(\text{Tp}^*)]$  (2c)– Observed *in situ* yet unable to be isolated (400 MHz,  $d_6$ -benzene,  $25^\circ\text{C}$ ,  $\delta$ ):

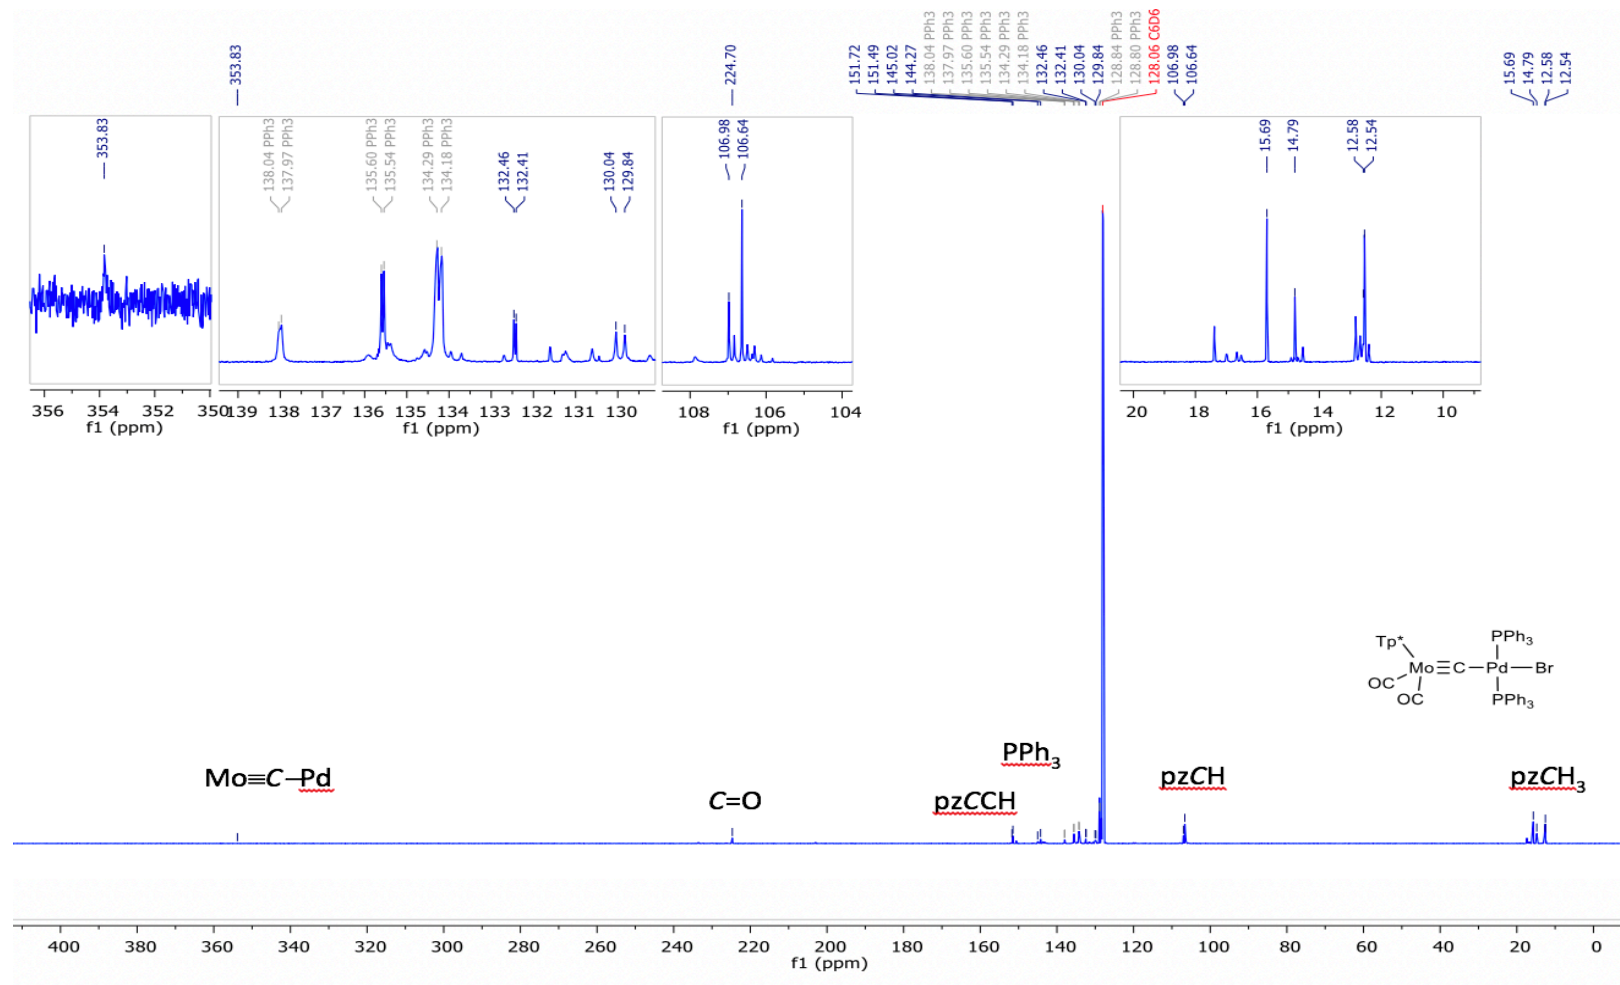

Figure S19.  $^{13}\text{C}$  NMR Spectrum of  $[\text{MoPd}(\mu\text{-C})(\text{CO})_2(\text{PPh}_3)_2(\text{Tp}^*)]$  (2c) – Observed *in situ* yet unable to be isolated (176 MHz,  $d_6$ -benzene, 25 °C,  $\delta$ ):

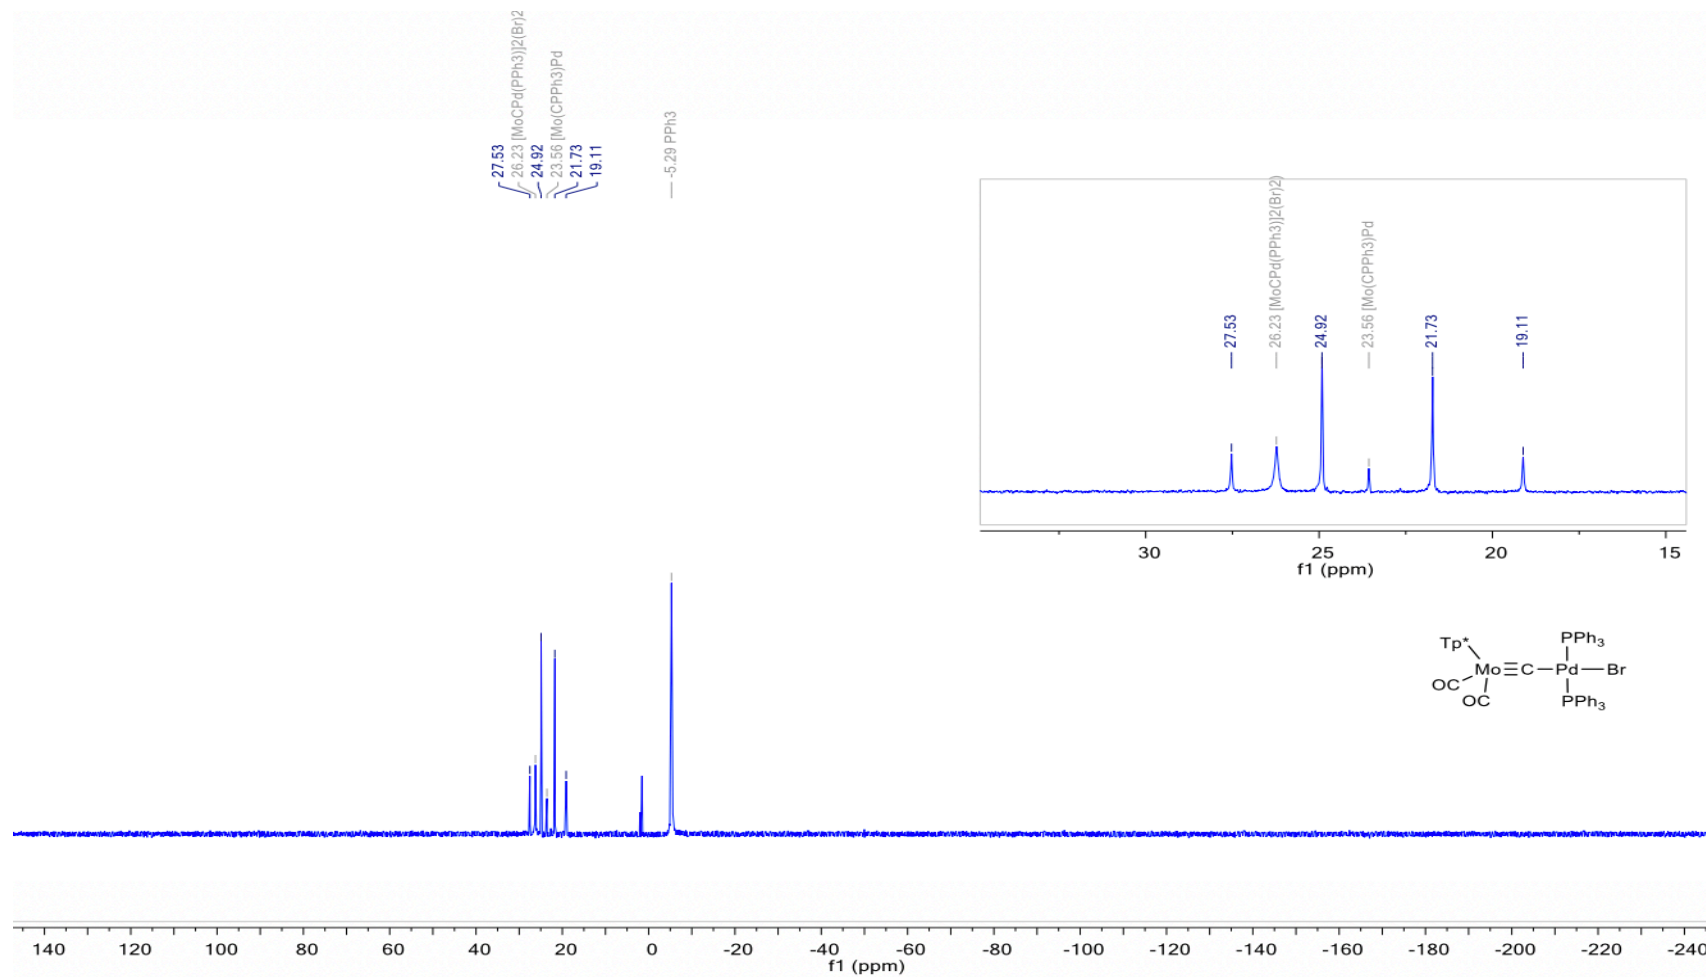

Figure S20.  $^{31}\text{P}$  NMR Spectrum of  $[\text{MoPd}(\mu\text{-C})(\text{CO})_2(\text{PPh}_3)_2(\text{Tp}^*)]$  (2c) – Observed *in situ* yet unable to be isolated (162 MHz,  $d_6$ -benzene, 25 °C,  $\delta$ ):

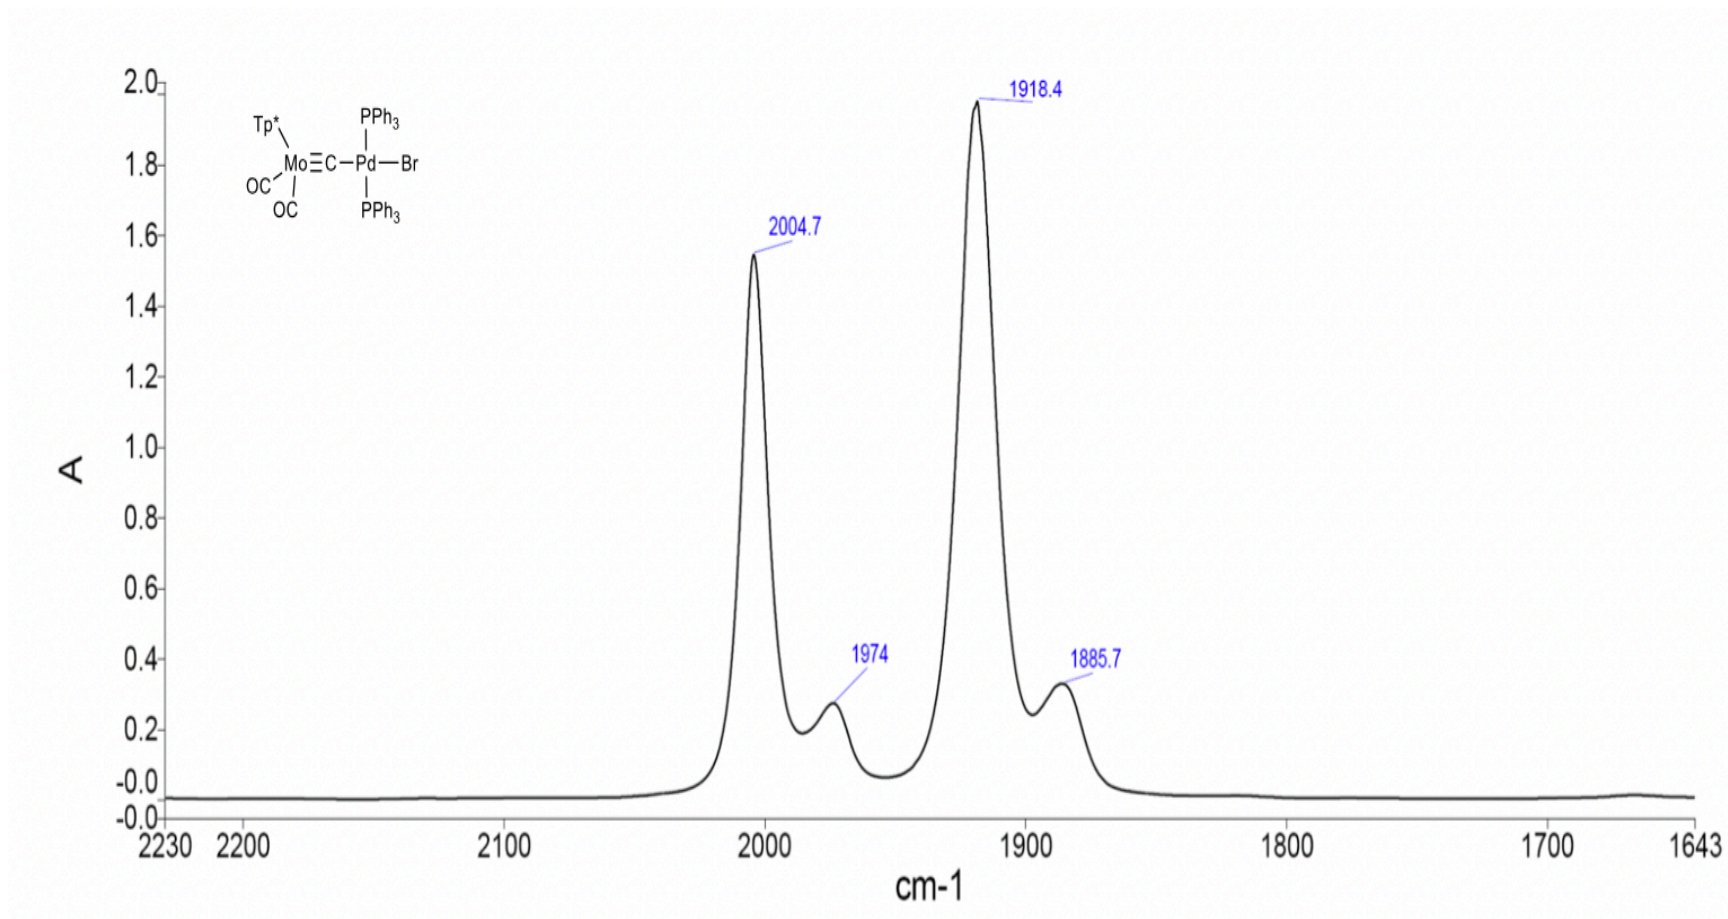

Figure S21. Infrared Spectrum of  $[\text{MoPd}(\mu\text{-C})(\text{CO})_2(\text{PPh}_3)_2(\text{Tp}^*)]$  (2c) – Observed *in situ* yet unable to be isolated ( $\text{CaF}_2$ ,  $\text{CH}_2\text{Cl}_2$ , 25 °C,  $\nu$ ):

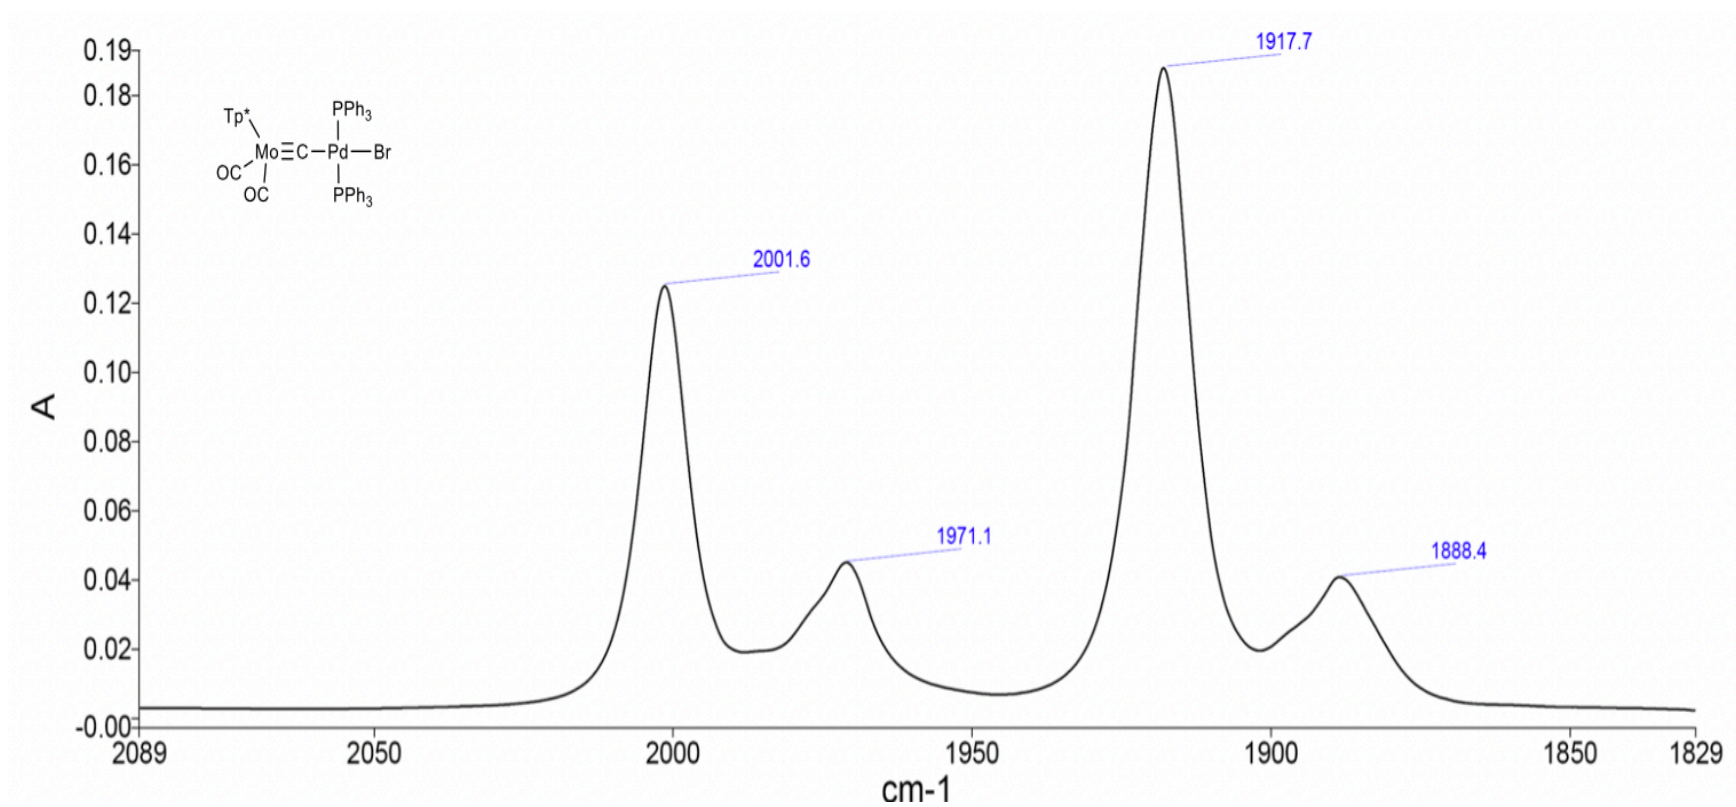

Figure S22. Infrared Spectrum of  $[\text{MoPd}(\mu\text{-C})(\text{CO})_2(\text{PPh}_3)_2(\text{Tp}^*)]$  (2c) – Observed *in situ* yet unable to be isolated ( $\text{CaF}_2$ , THF, 25 °C, v):



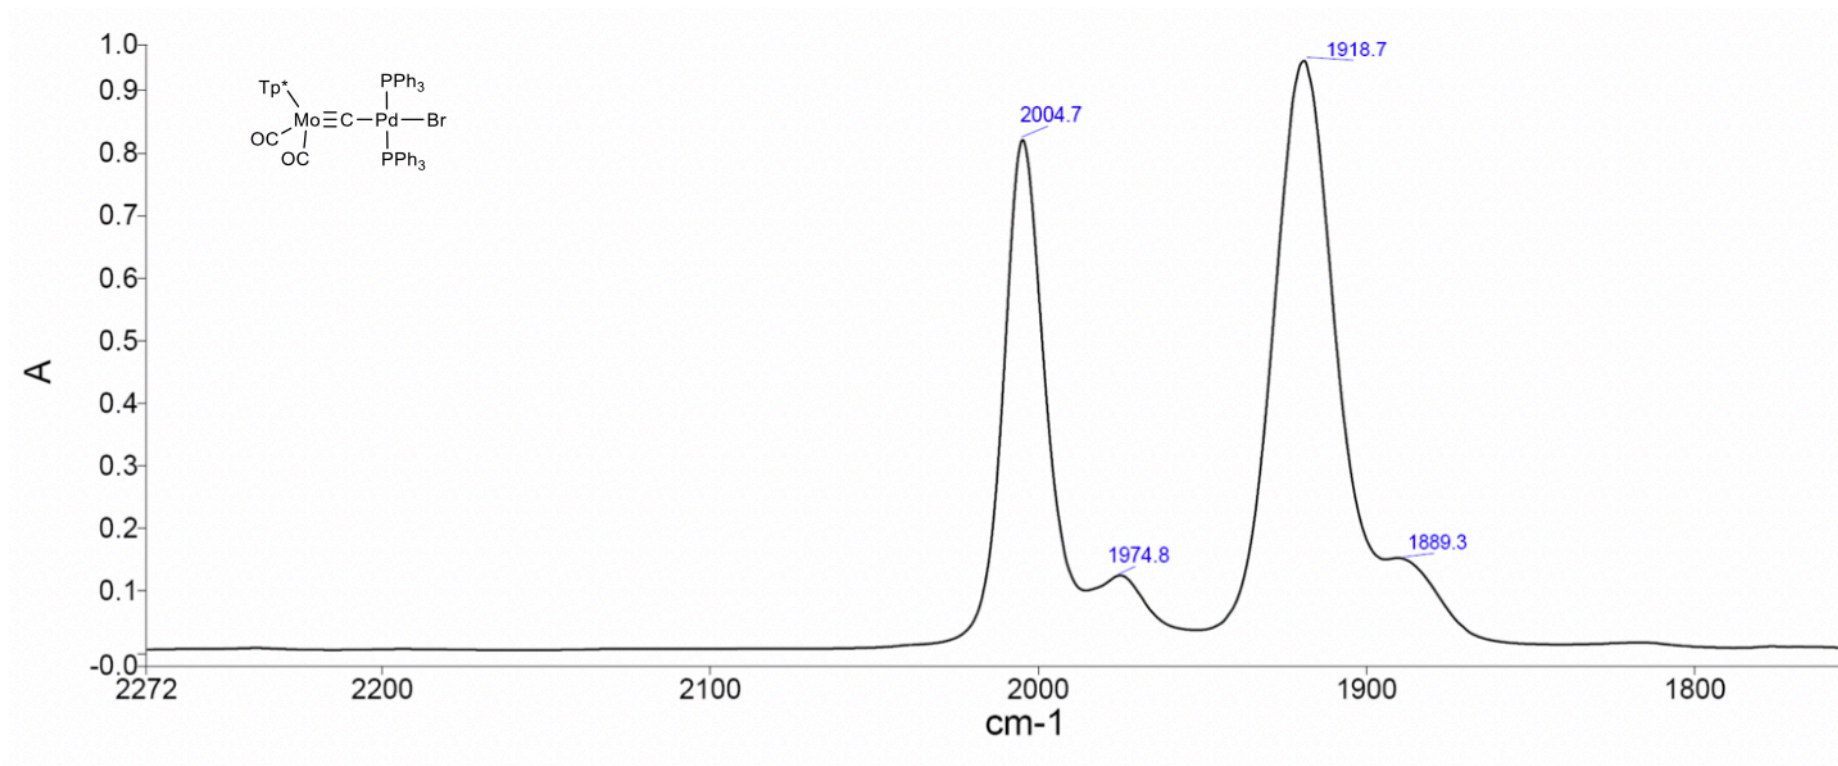

Figure S23. Infrared Spectrum of  $[\text{MoPd}(\mu\text{-C})(\text{CO})_2(\text{PPh}_3)_2(\text{Tp}^*)]$  (2c) – Observed *in situ* yet unable to be isolated ( $\text{CaF}_2$ ,  $\text{CHCl}_3$ , 25 °C, v):

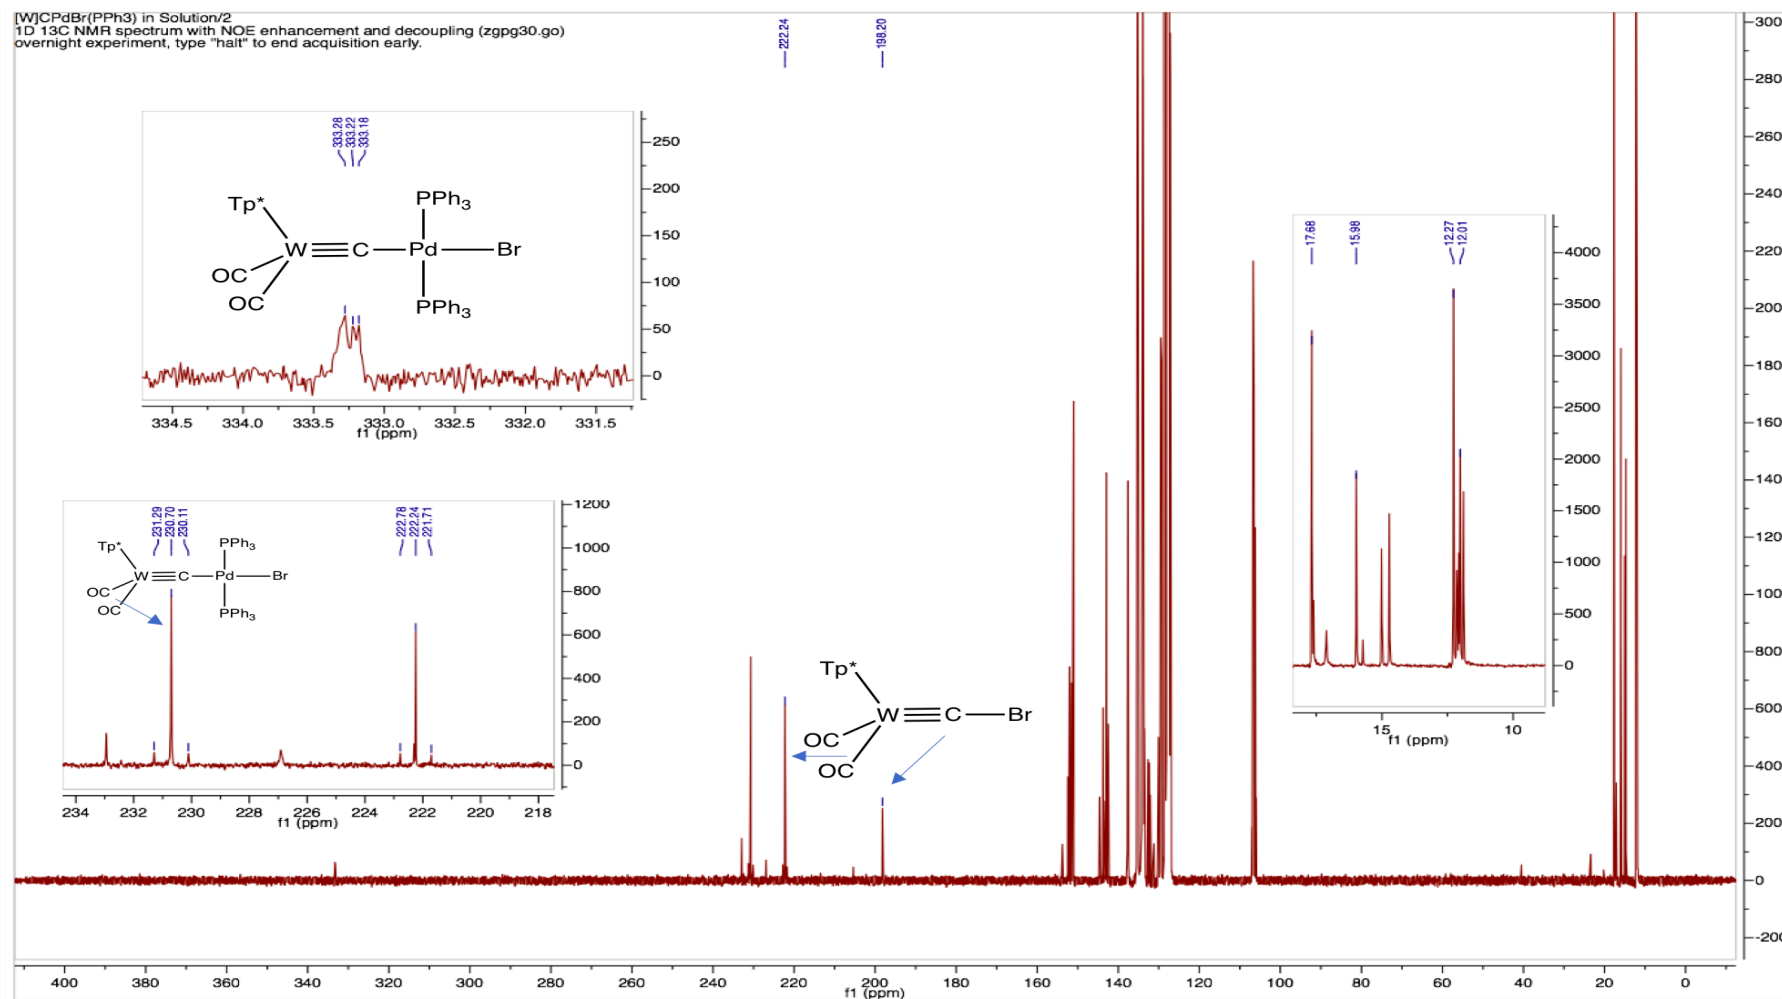

Figure S24. Observation of  $[\text{WPd}(\mu\text{-C})\text{Br}(\text{CO})_2(\text{PPh}_3)_2(\text{Tp}^*)]$  (2d) –  $^{13}\text{C}\{^1\text{H}\}$  NMR spectrum (151 MHz,  $\text{C}_6\text{D}_6$ , 25 °C)



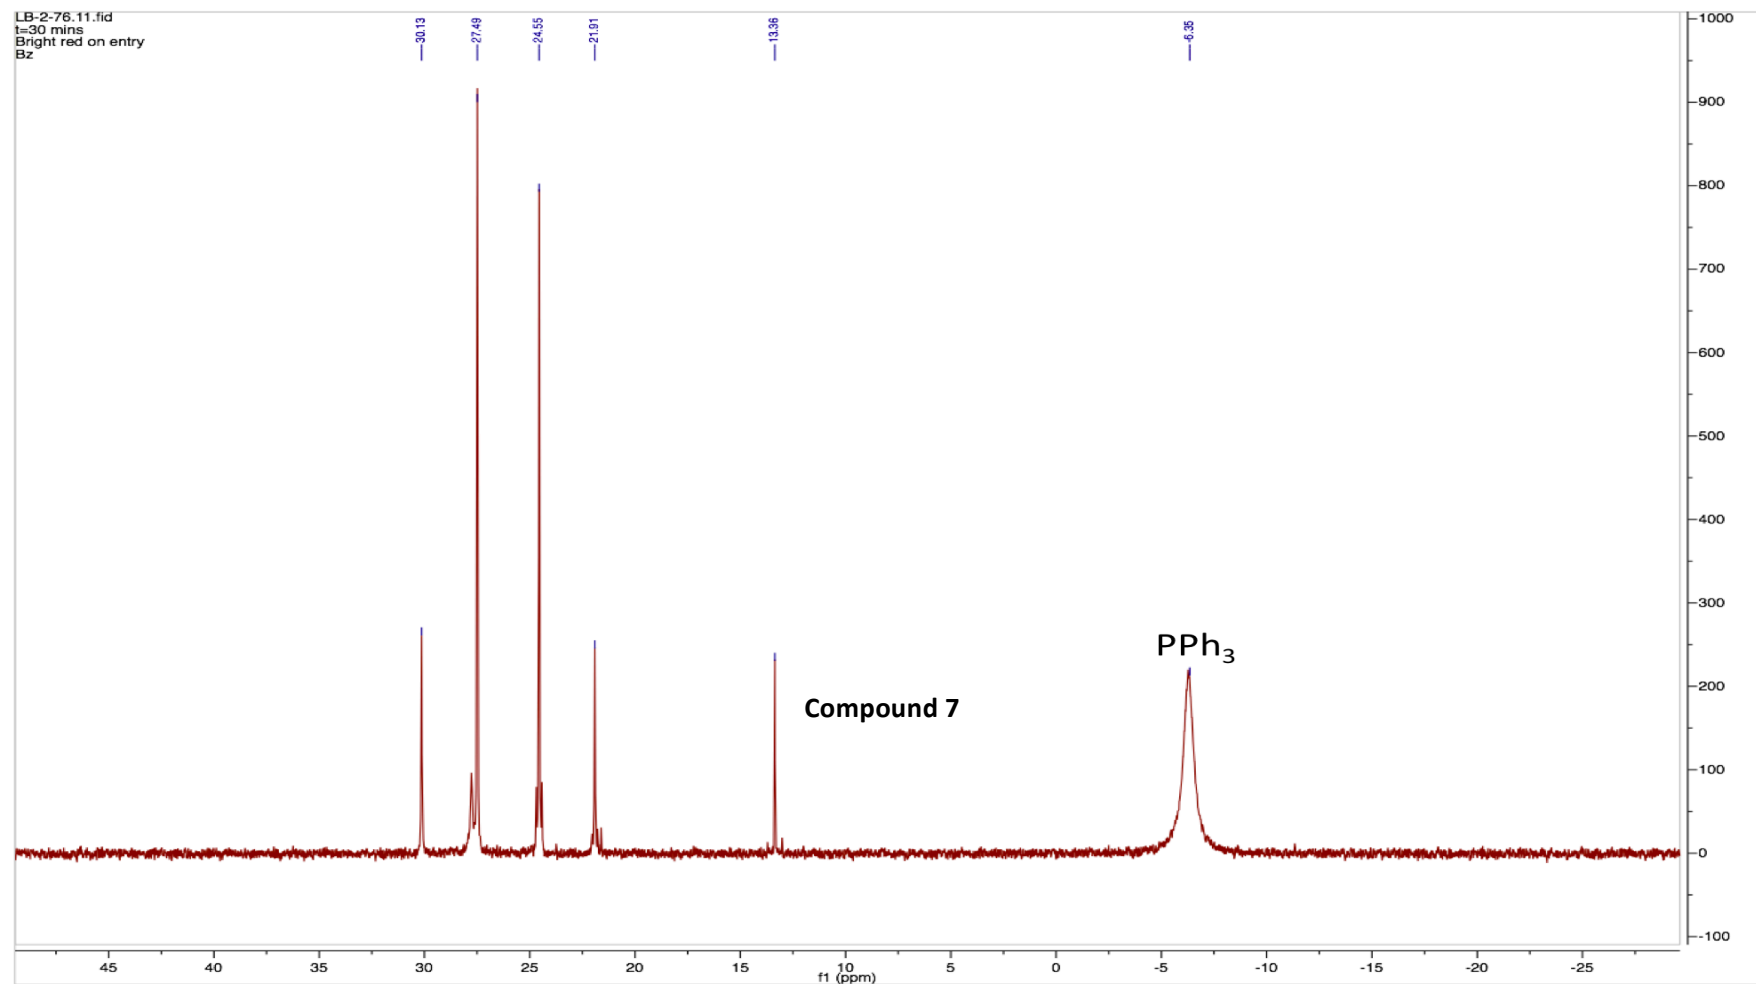

Figure S25. Observation of  $[\text{WPd}(\mu\text{-C})\text{Br}(\text{CO})_2(\text{PPh}_3)_2(\text{Tp}^*)]$  (2d) –  $^{31}\text{P}\{^1\text{H}\}$  NMR spectrum (162 MHz,  $\text{C}_6\text{D}_6$ , 25 °C)

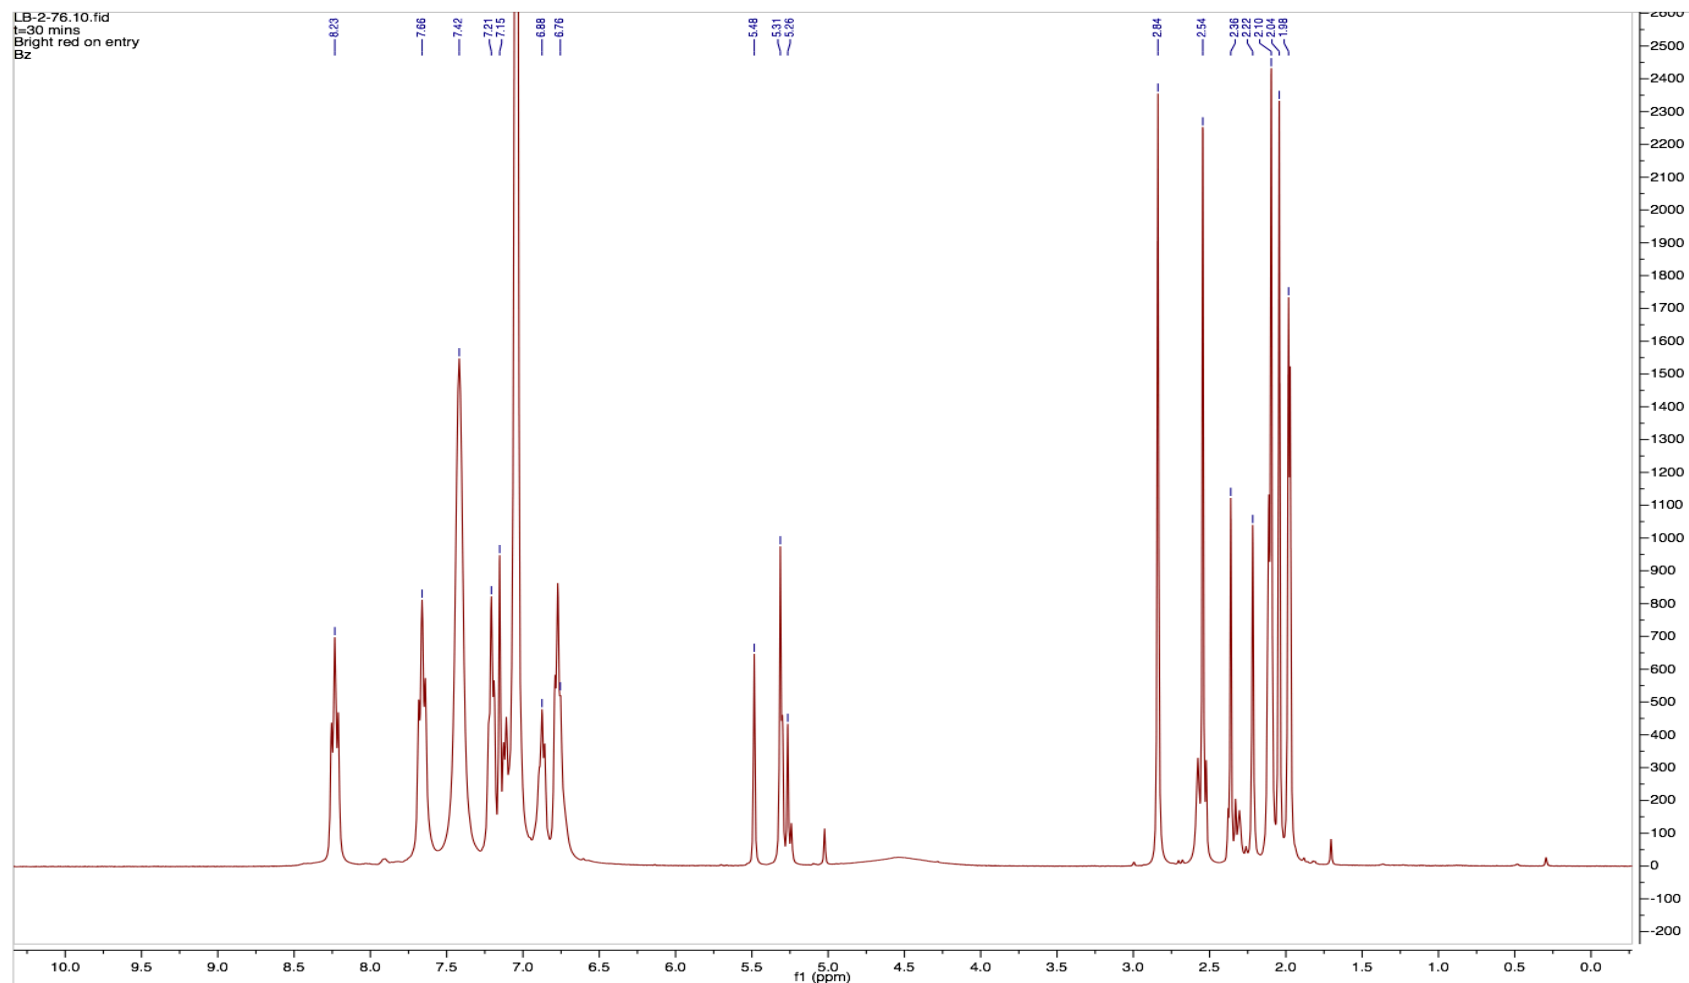

Figure S26. Observation of  $[\text{WPd}(\mu\text{-C})\text{Br}(\text{CO})_2(\text{PPh}_3)_2(\text{Tp}^*)]$  (2d)  $^1\text{H}$  NMR spectrum (400 MHz,  $\text{C}_6\text{D}_6$ , 25 °C)

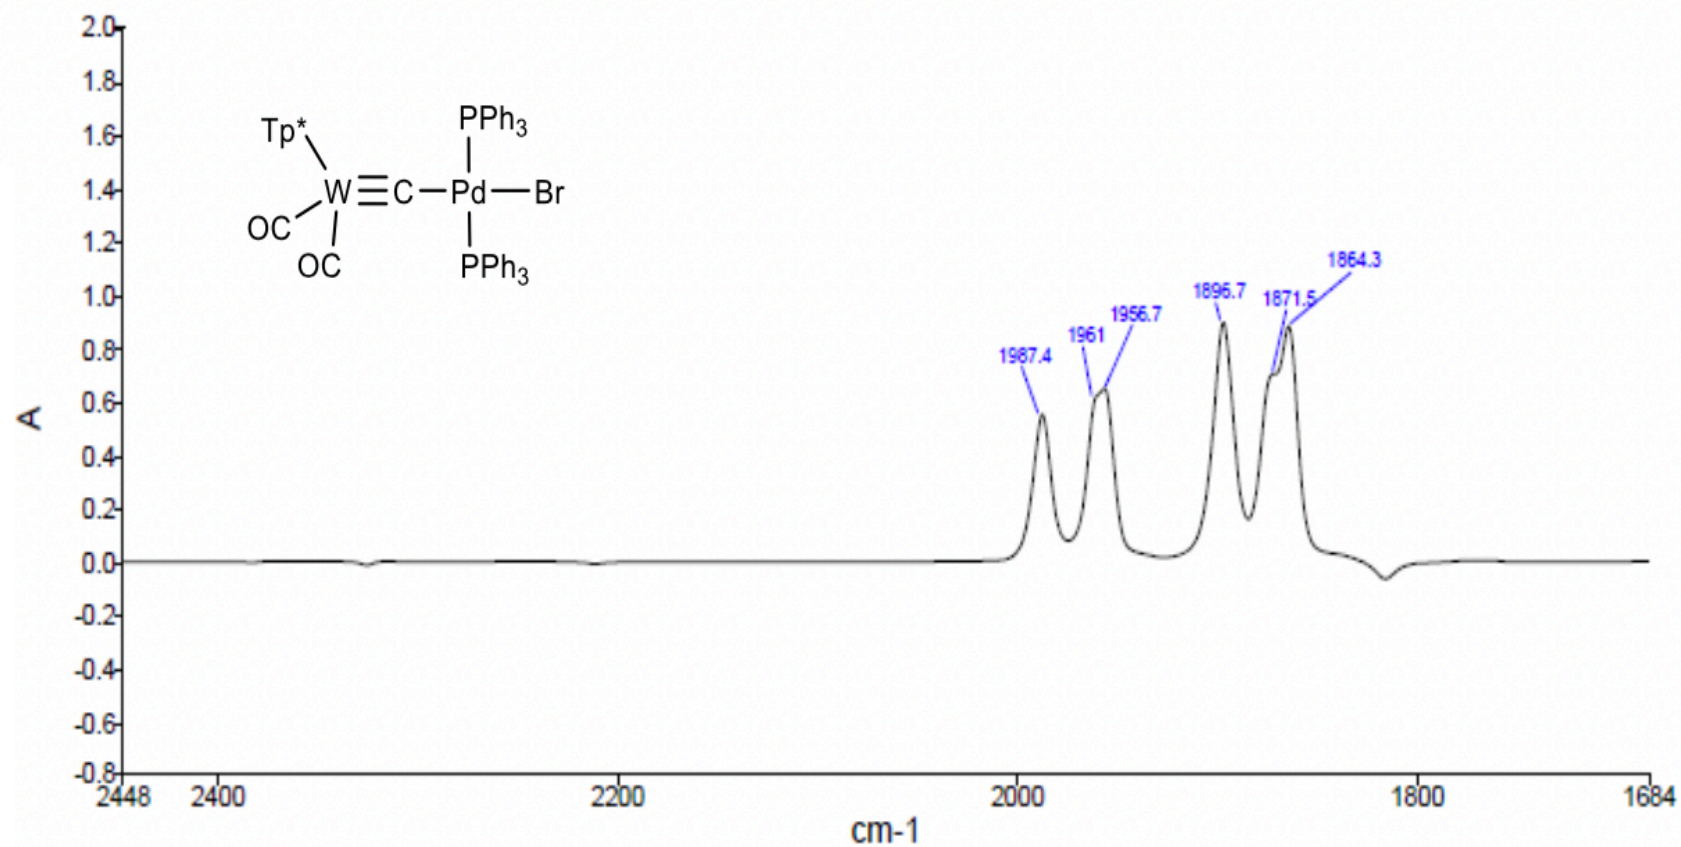

Figure S27. Infrared Spectrum of  $[WPd(\mu-C)(CO)_2(PPh_3)_2(Tp^*)]$  (2d) – Observed *in situ* yet unable to be isolated ( $CaF_2$ ,  $CH_2Cl_2$ ,  $25^\circ C$ ) Peaks at 1987 and  $1895\text{ cm}^{-1}$  correspond to unreacted 1b.

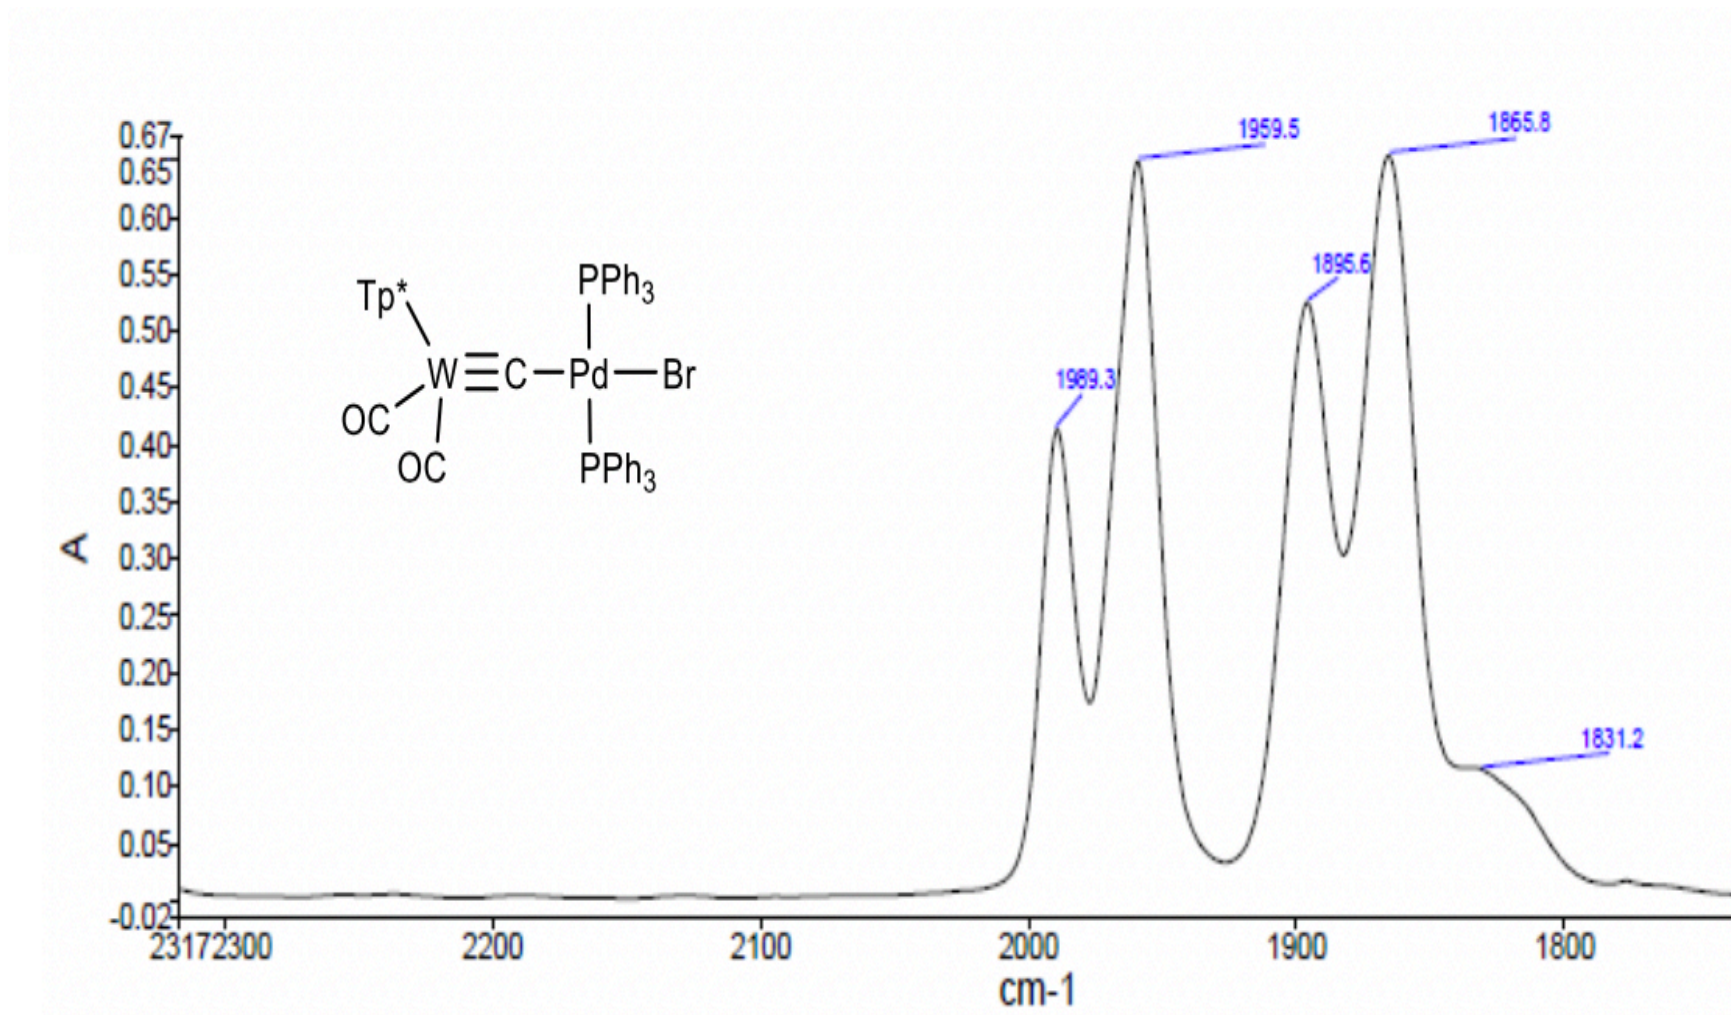

Figure S28. Infrared Spectrum of  $[\text{WPd}(\mu\text{-C})(\text{CO})_2(\text{PPh}_3)_2(\text{Tp}^*)]$  (2d) – Observed *in situ* yet unable to be isolated ( $\text{CaF}_2$ ,  $\text{CHCl}_3$ ,  $25^\circ\text{C}$ ) Peaks at 1989 and 1896  $\text{cm}^{-1}$  correspond to unreacted 1b.

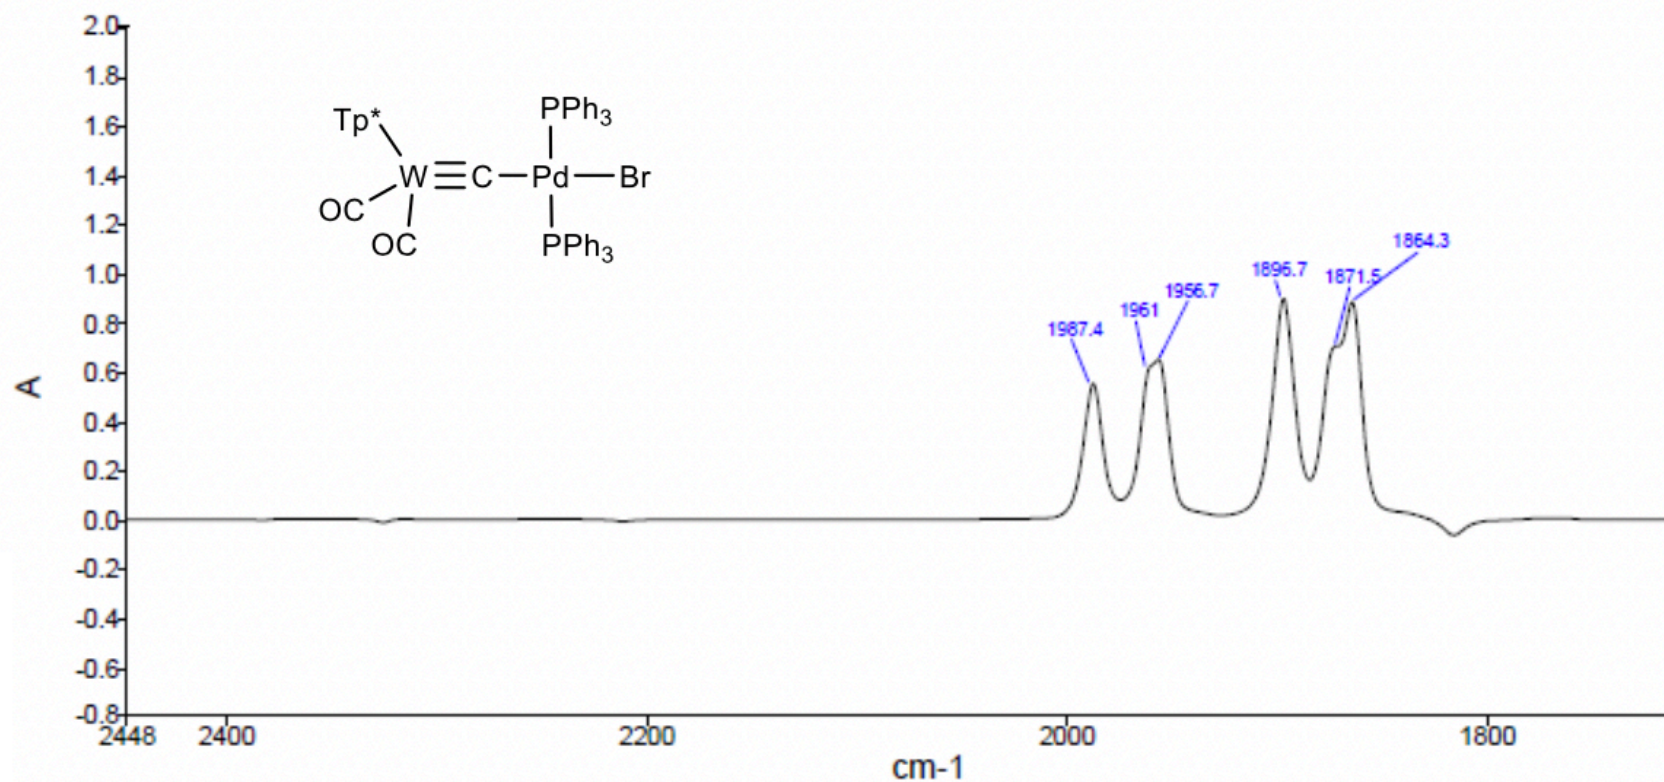

Figure S29. Infrared Spectrum of  $[WPd(\mu-C)(CO)_2(PPh_3)_2(Tp^*)]$  (2d) – Observed *in situ* yet unable to be isolated ( $CaF_2$ , benzene, 25 °C) Peaks at 1987 and 1897  $cm^{-1}$  correspond to unreacted 1b.

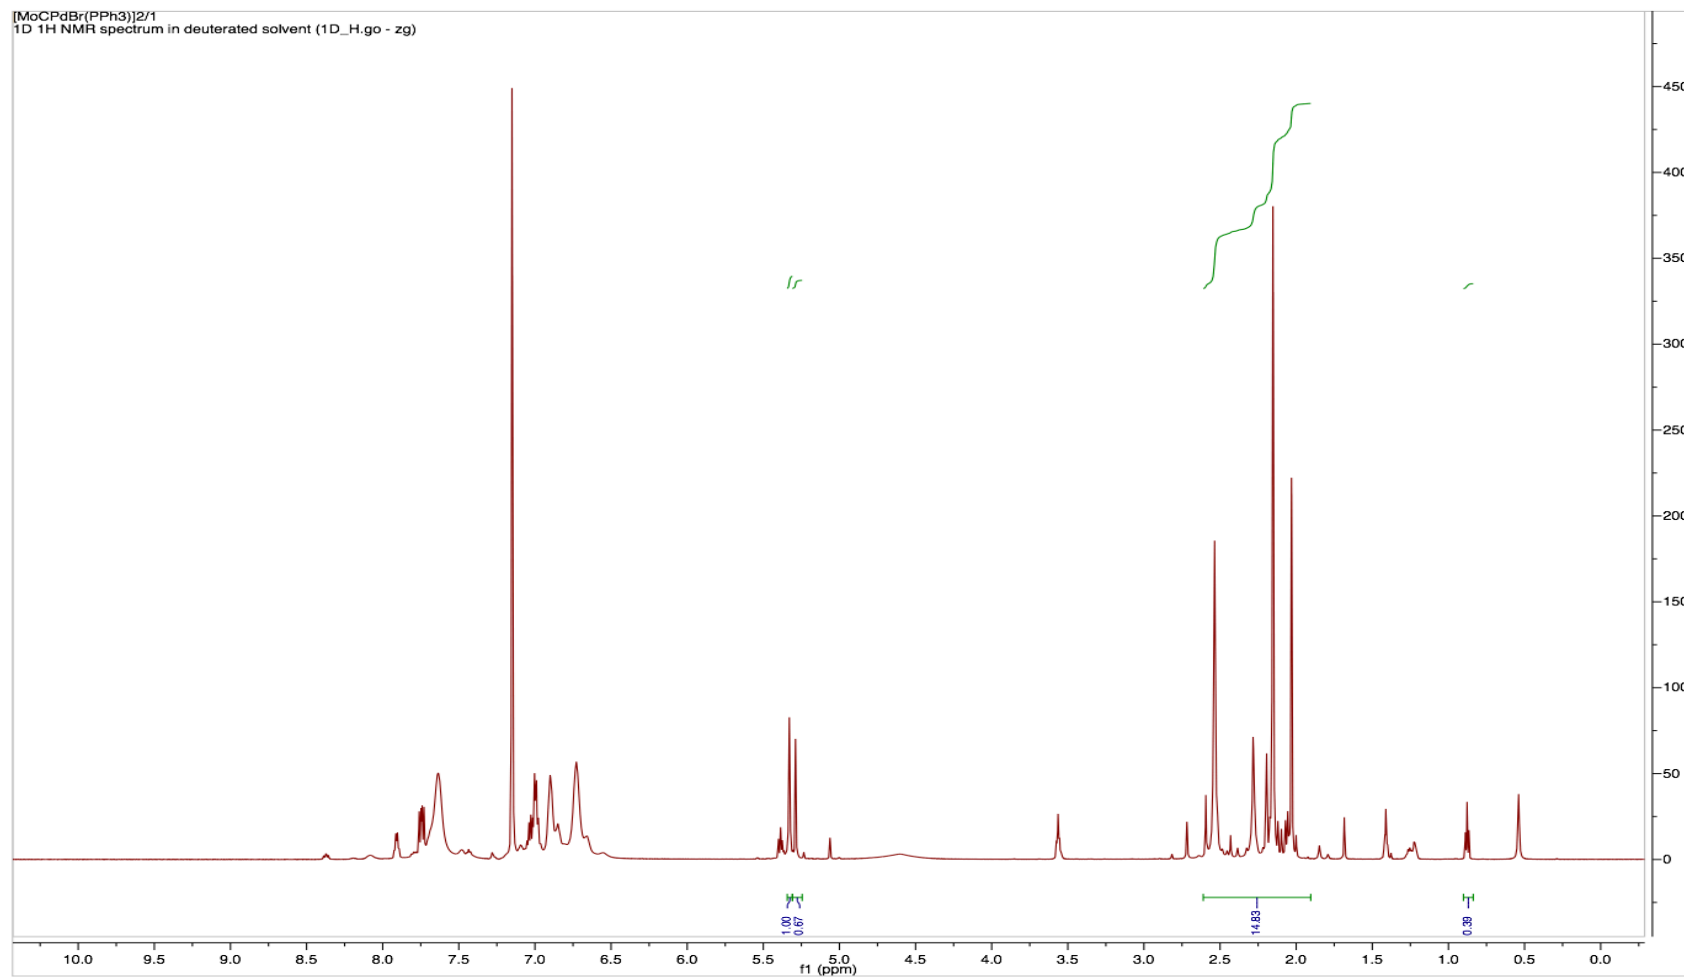

Figure S30. <sup>1</sup>H NMR Spectrum of [Mo<sub>2</sub>Pd<sub>2</sub>(μ-C)<sub>2</sub>Br<sub>2</sub>(CO)<sub>4</sub>(PPh<sub>3</sub>)<sub>2</sub>(Tp\*)<sub>2</sub>] (5a) (400 MHz, CDCl<sub>3</sub>, 25 °C)

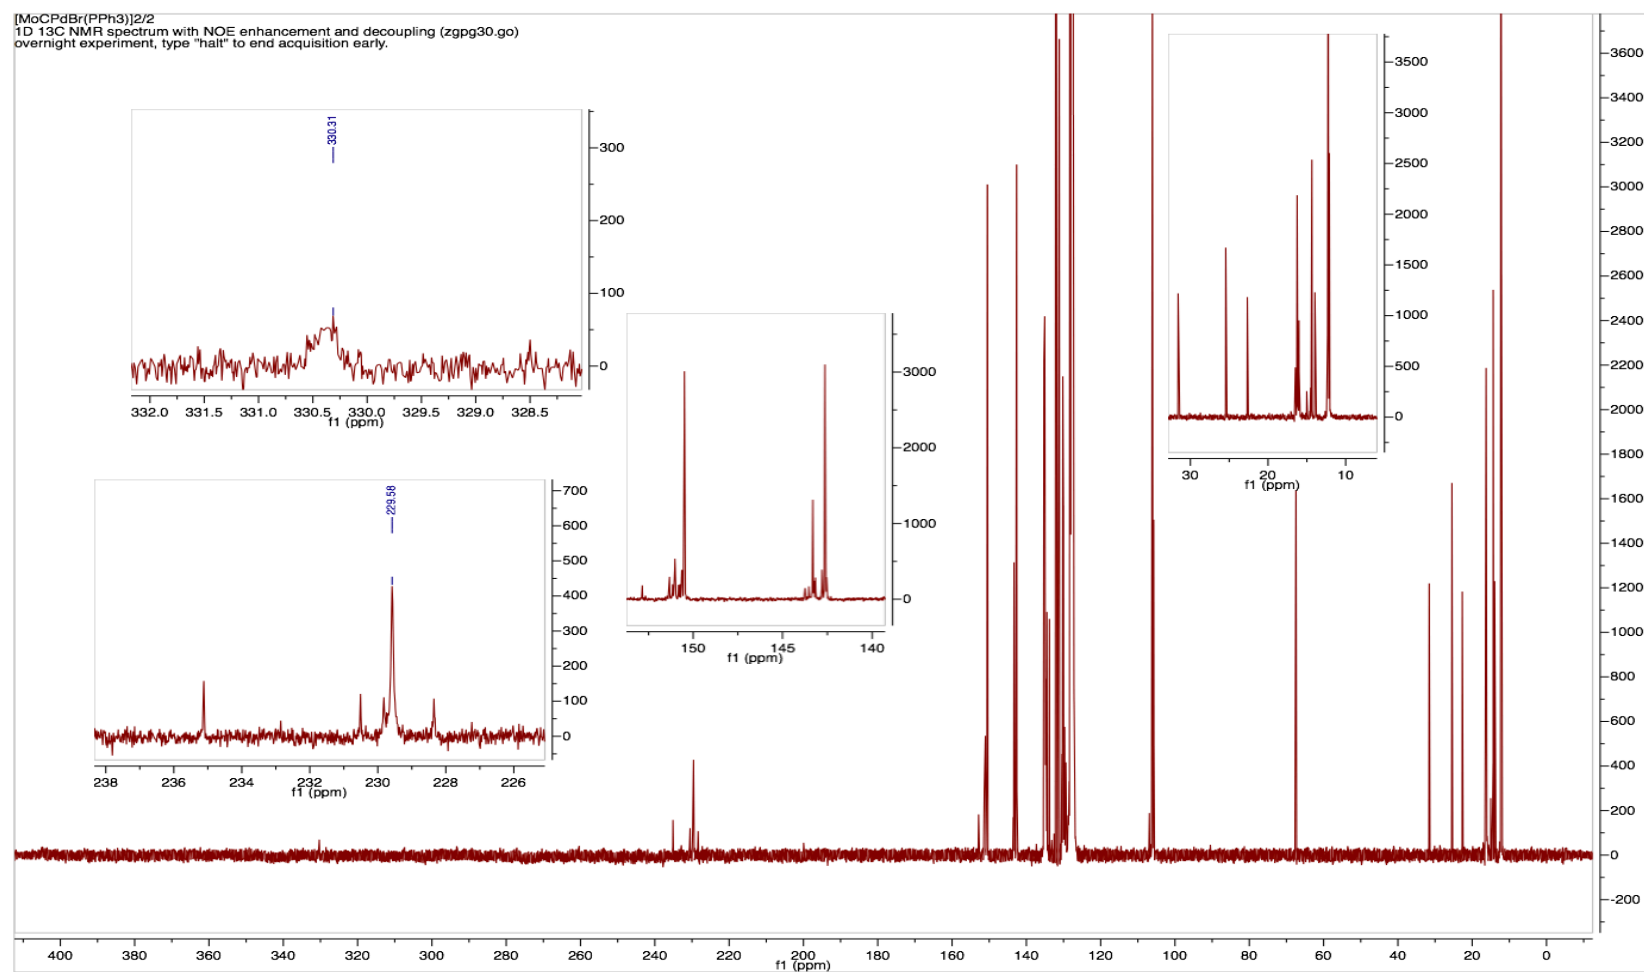

Figure S31. <sup>13</sup>C{<sup>1</sup>H} NMR Spectrum of [Mo<sub>2</sub>Pd<sub>2</sub>(μ-C)<sub>2</sub>Br<sub>2</sub>(CO)<sub>4</sub>(PPh<sub>3</sub>)<sub>2</sub>(Tp\*)<sub>2</sub>] (5a) (151 MHz, C<sub>6</sub>D<sub>6</sub>, 25 °C)

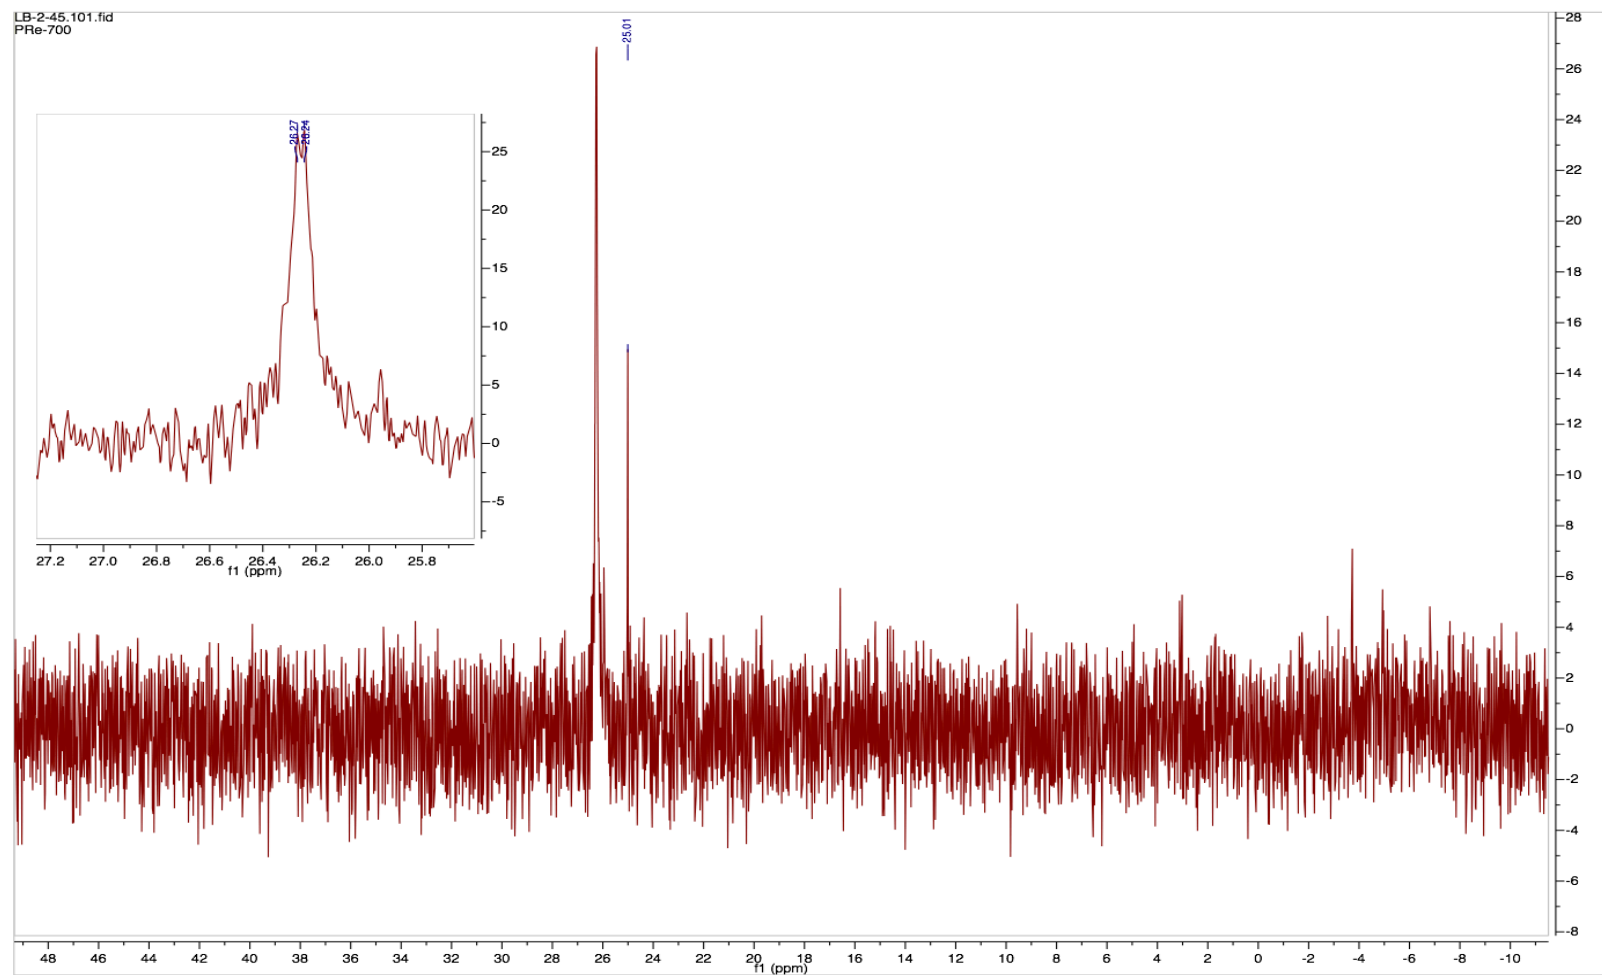

Figure S32.  $^{31}\text{P}\{^1\text{H}\}$  NMR Spectrum of  $[\text{Mo}_2\text{Pd}_2(\mu\text{-C})_2\text{Br}_2(\text{CO})_4(\text{PPh}_3)_2(\text{Tp}^*)_2]$  (5a) (162 MHz,  $\text{CDCl}_3$ , 25 °C)  $\delta_{\text{P}} = 25.0$  (OPPh<sub>3</sub>)



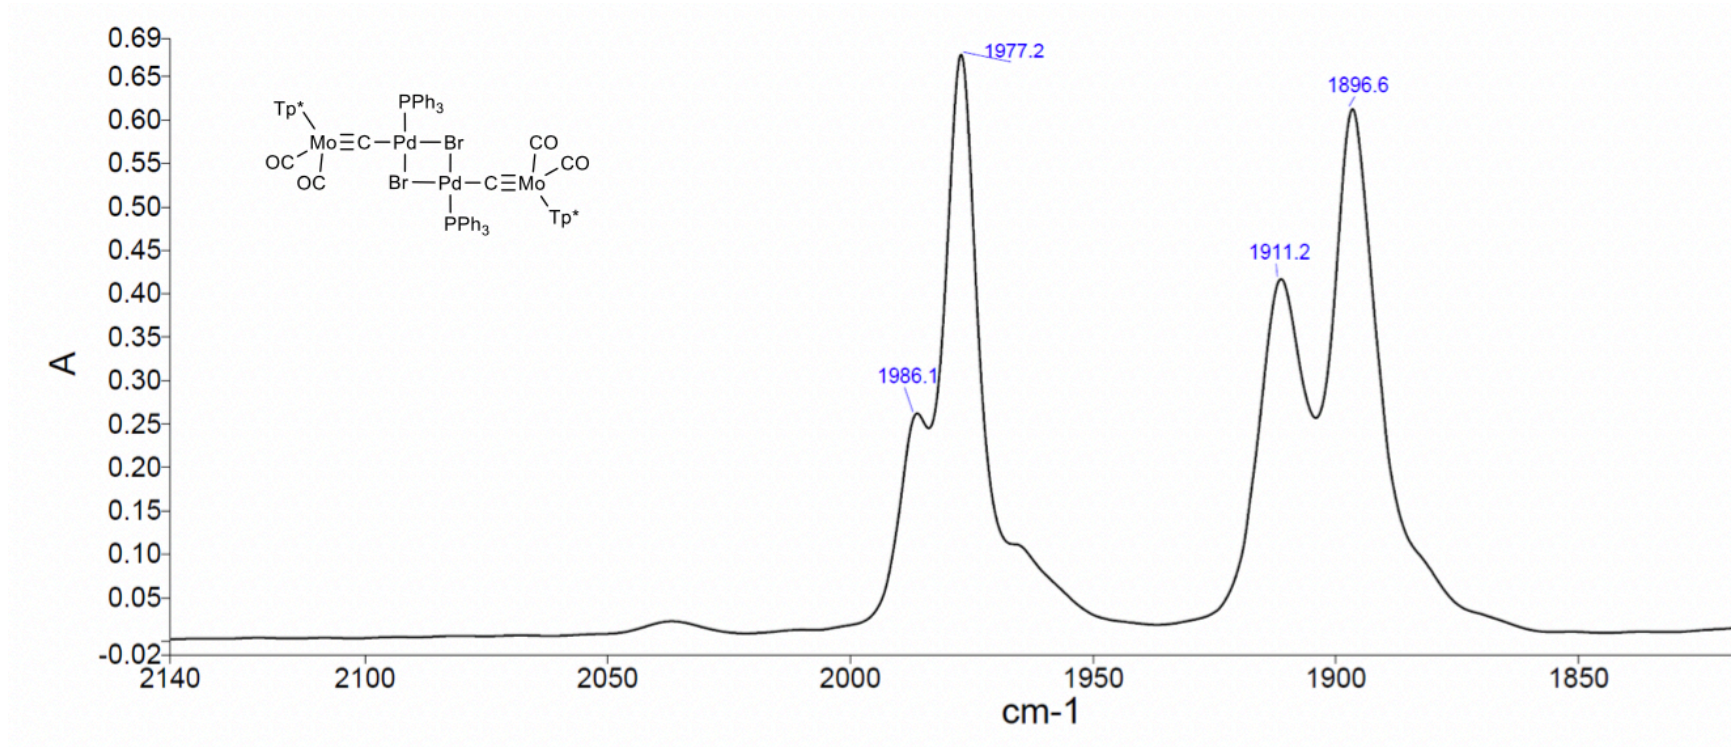

Figure S33. Infrared Spectrum of  $[\text{Mo}_2\text{Pd}_2(\mu\text{-C})_2\text{Br}_2(\text{CO})_4(\text{PPh}_3)_2(\text{Tp}^*)_2]$  (5a) (THF, 25 °C)

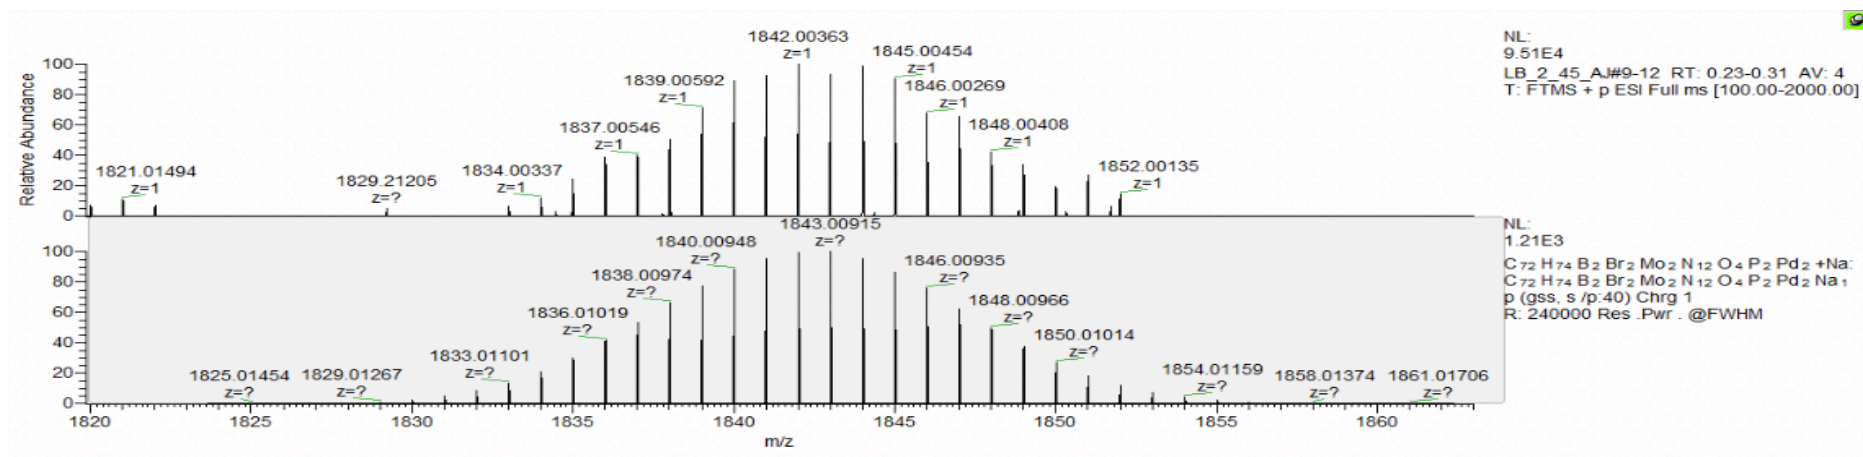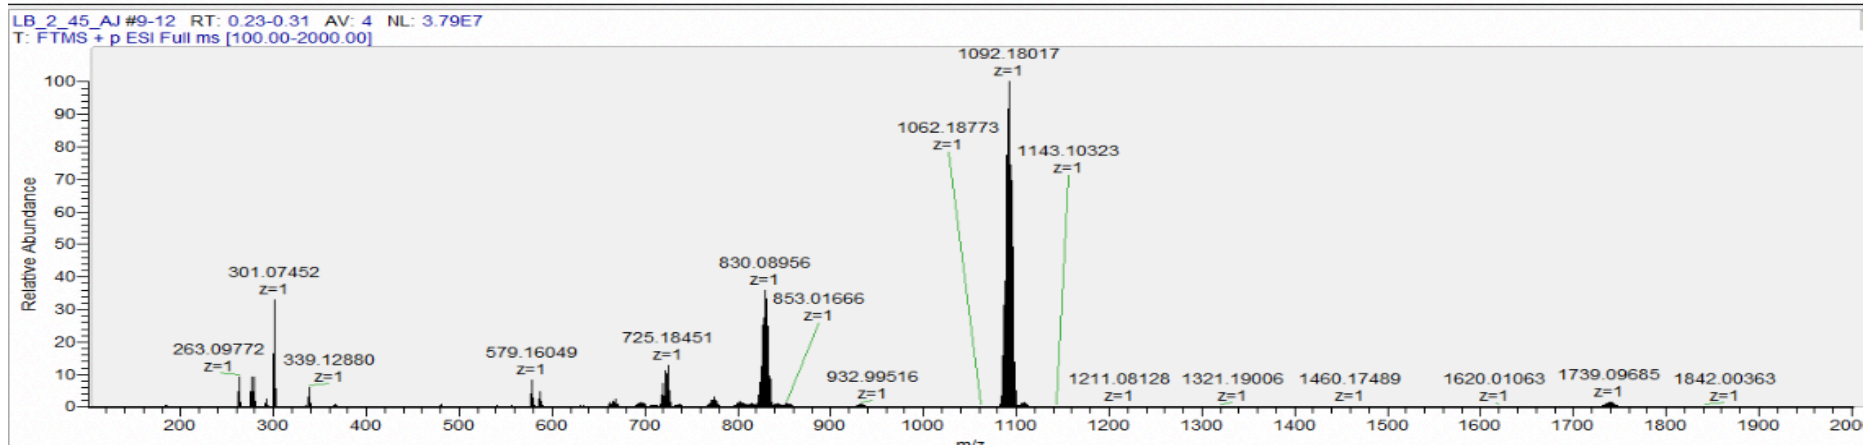

Figure S34. Mass Spectrum of  $[(\text{Tp}^*)\text{Mo}(\text{CO})_2](\mu\text{-C})\text{-Pd}(\text{PPh}_3)_2(\mu\text{-Br})_2$  (5a) (ESI):  $[\text{M}+\text{Na}]^+$

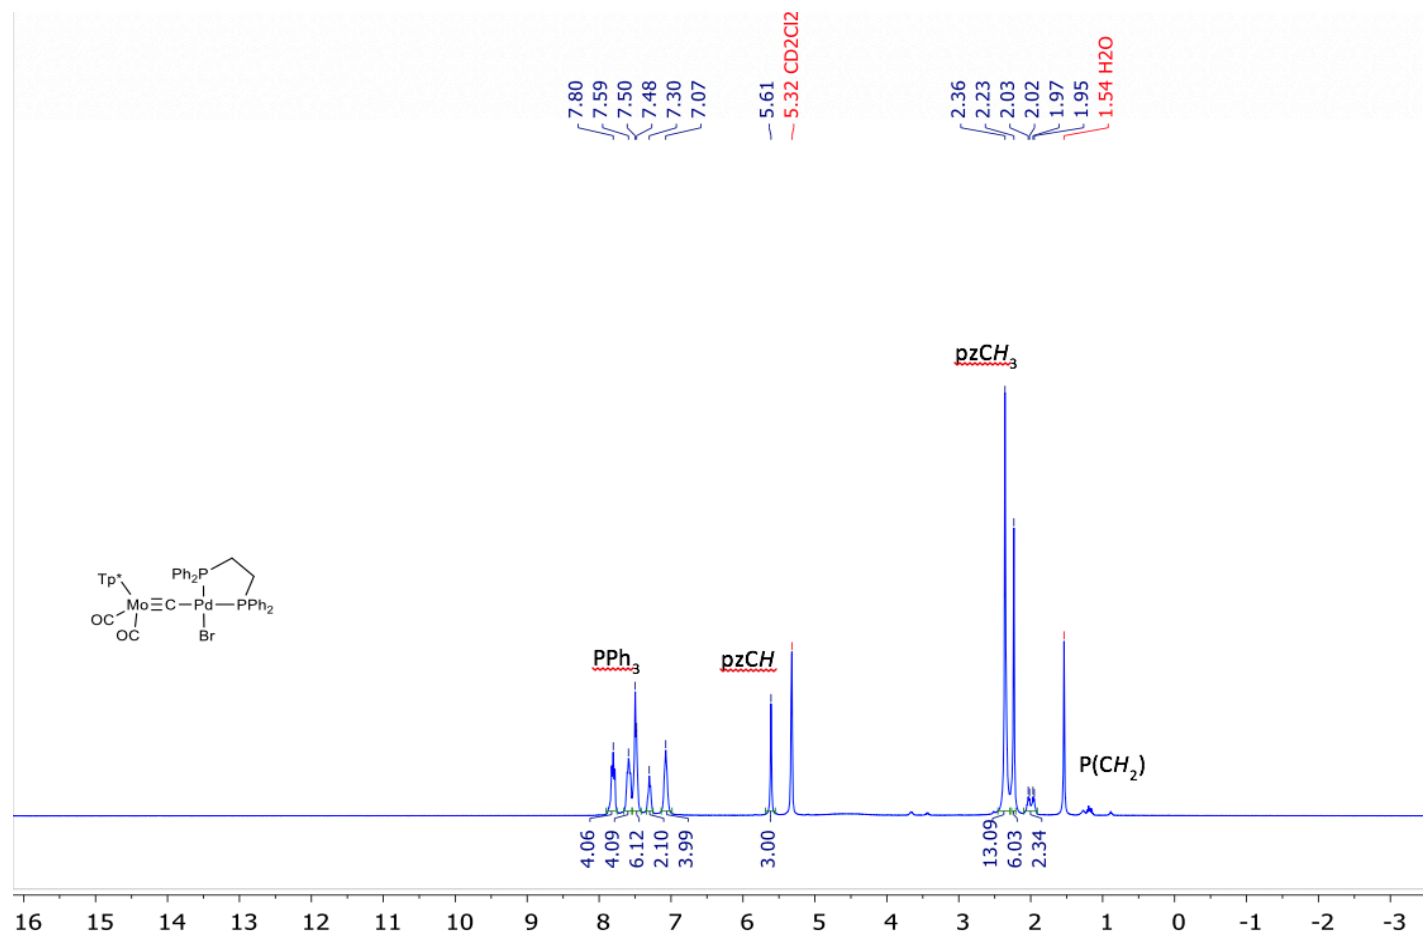

Figure S35.  $^1\text{H}$  NMR Spectrum of  $[\text{MoPd}(\mu\text{-C})\text{Br}(\text{CO})_2(\text{dppe})(\text{Tp}^*)]$  (6) (400 MHz,  $\text{CD}_2\text{Cl}_2$ , 25 °C)

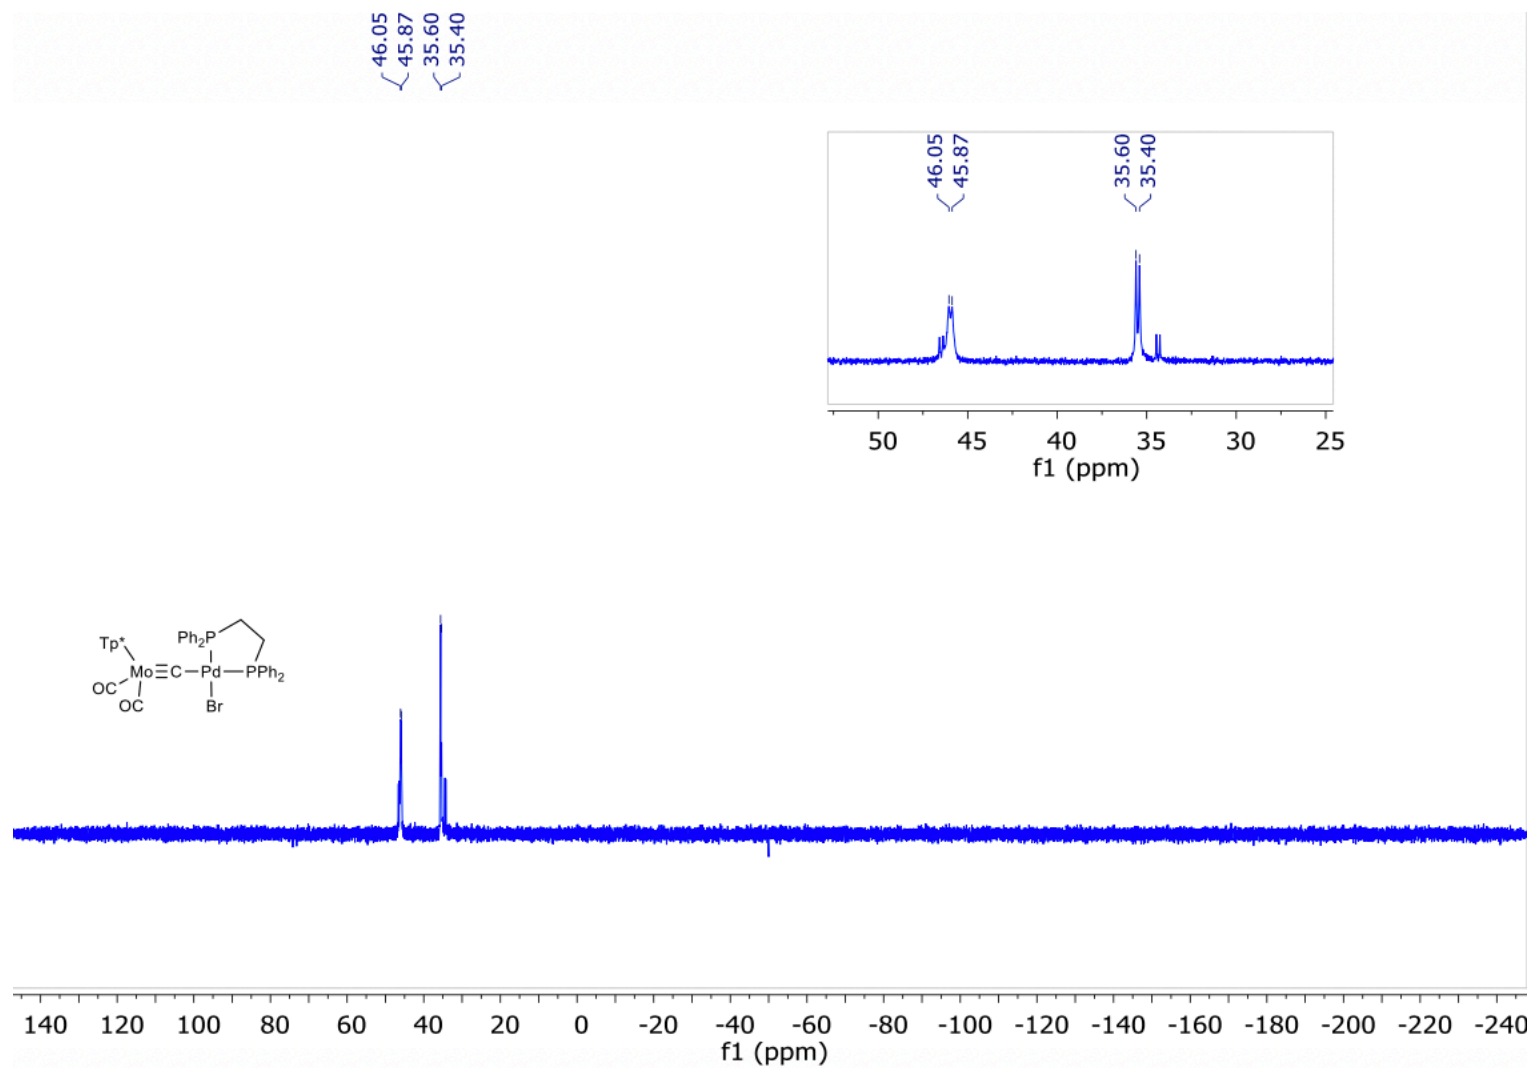

Figure S36.  $^{31}\text{P}\{^1\text{H}\}$  NMR Spectrum of  $[\text{MoPd}(\mu\text{-C})\text{Br}(\text{CO})_2(\text{dppe})(\text{Tp}^*)]$  (6) (162 MHz,  $\text{CD}_2\text{Cl}_2$ , 25 °C)

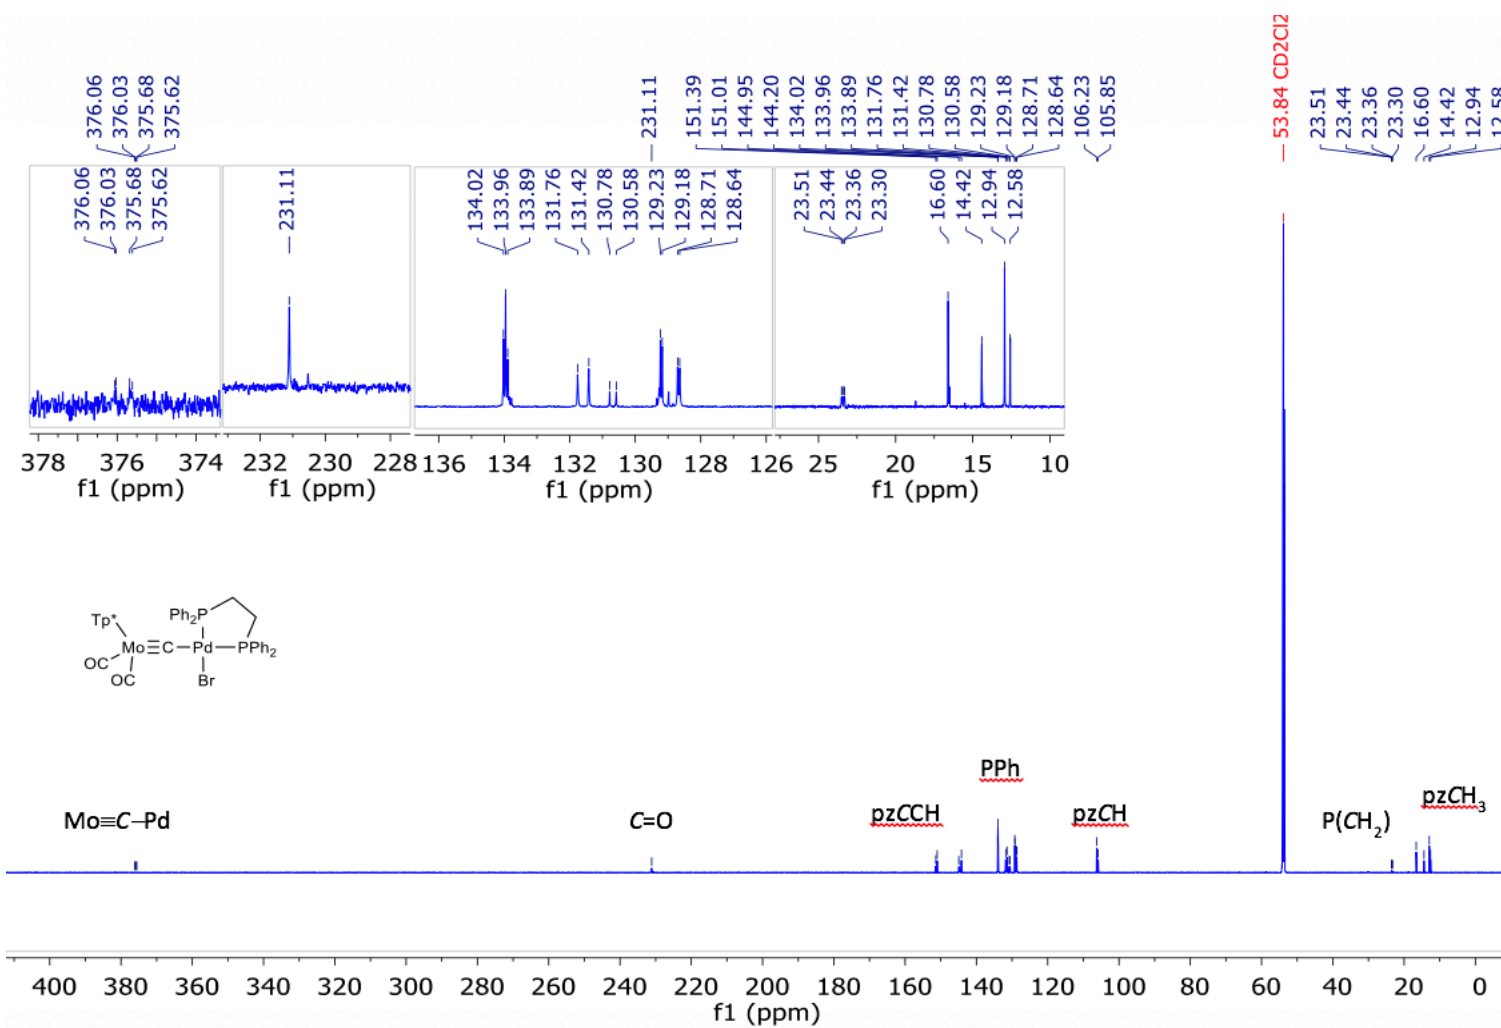

Figure S37.  $^{13}\text{C}\{^1\text{H}\}$  NMR Spectrum of  $[\text{MoPd}(\mu\text{-C})\text{Br}(\text{CO})_2(\text{dppe})(\text{Tp}^*)]$  (6) (176 MHz,  $\text{CD}_2\text{Cl}_2$ , 25 °C)

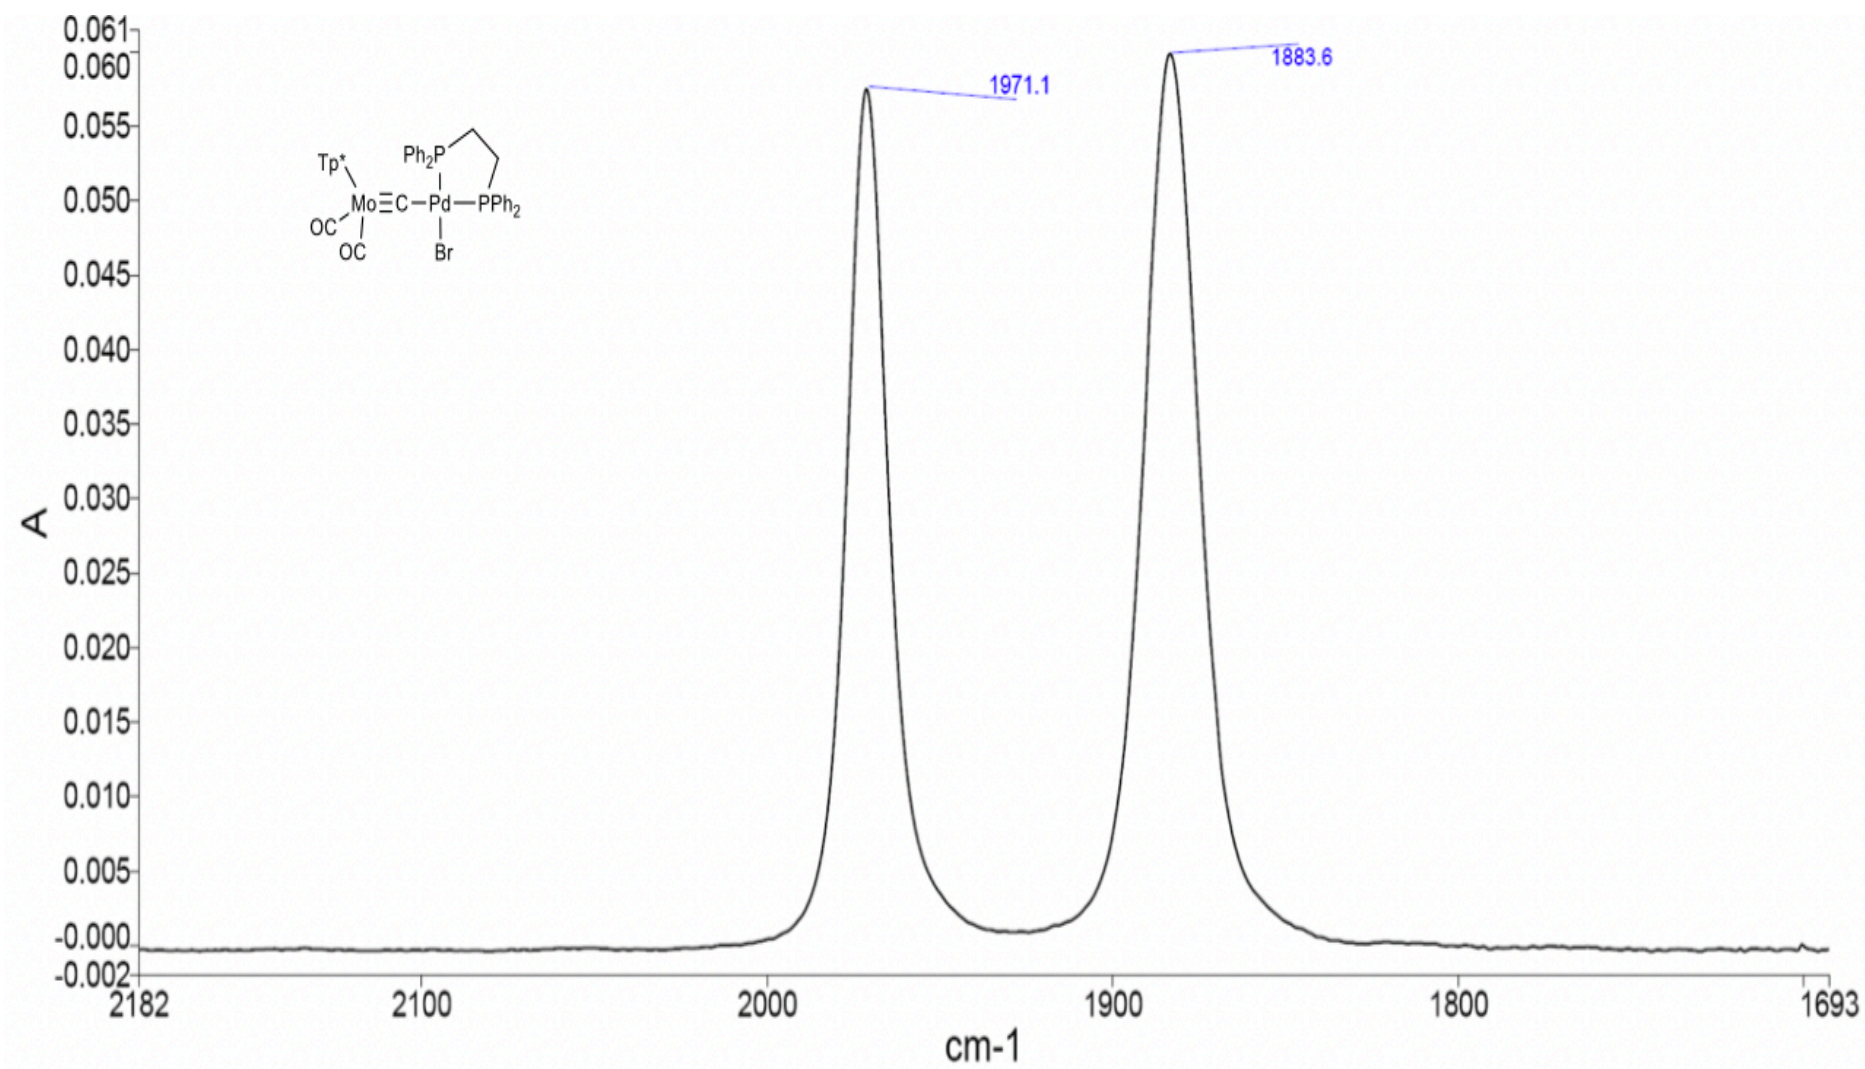

Figure S38. IR Spectrum of [MoPd(μ-C)Br(CO)<sub>2</sub>(dppe)(Tp\*)] (6) (CH<sub>2</sub>Cl<sub>2</sub>, 25 °C)



**Figure S39. RSC/RSB Joint Mass Spectrometry Facility Analysis Report: IR Spectrum of [MoPd( $\mu$ -C)Br(CO)<sub>2</sub>(dppe)(Tp\*)] (6)**
**Instrument:** Orbitrap QE, +ve mode ESI at 280k resolution **Analysis Date:** 2019-08-15

**Theoretical m/z (most abundant isotopologue): [M]<sup>+</sup> ion: 1135.11396 Observed m/z (most abundant isotopologue): [M]<sup>+</sup> ion: 1135.11401 Mass error: 0.869 ppm**
**Observed versus simulated spectrum for detected target formulas [M]<sup>+</sup> ion**
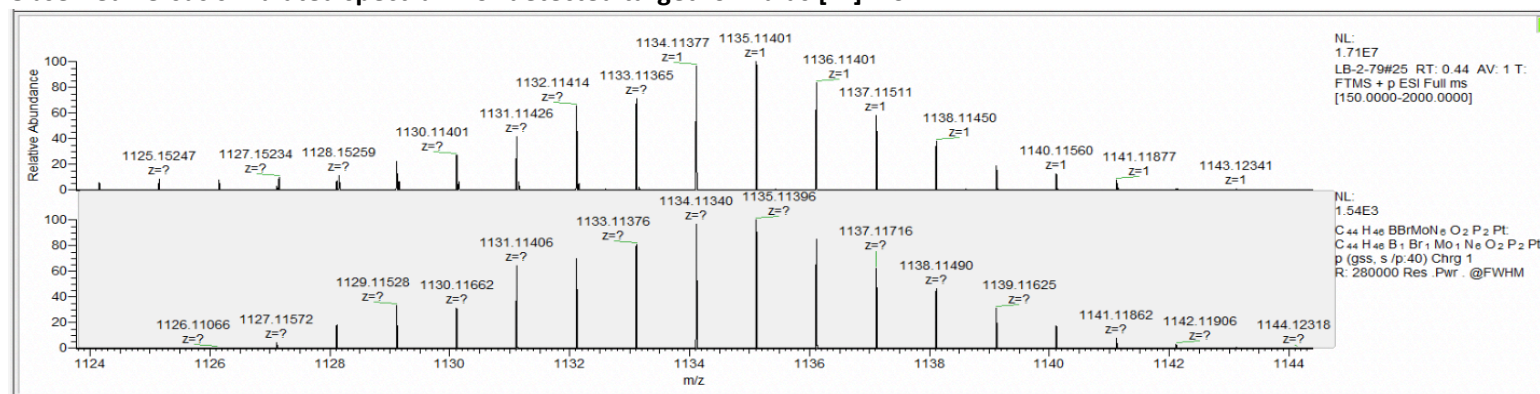
**Full Spectrum:**
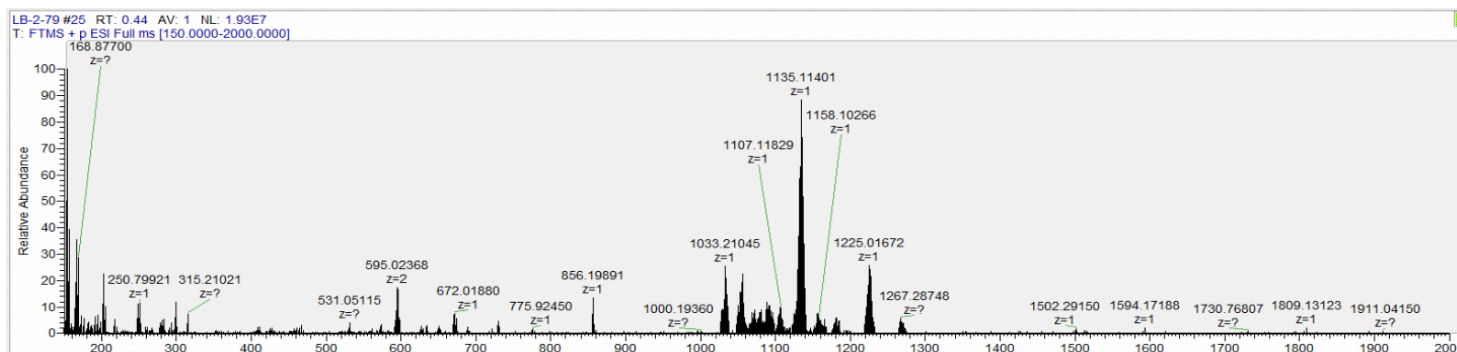

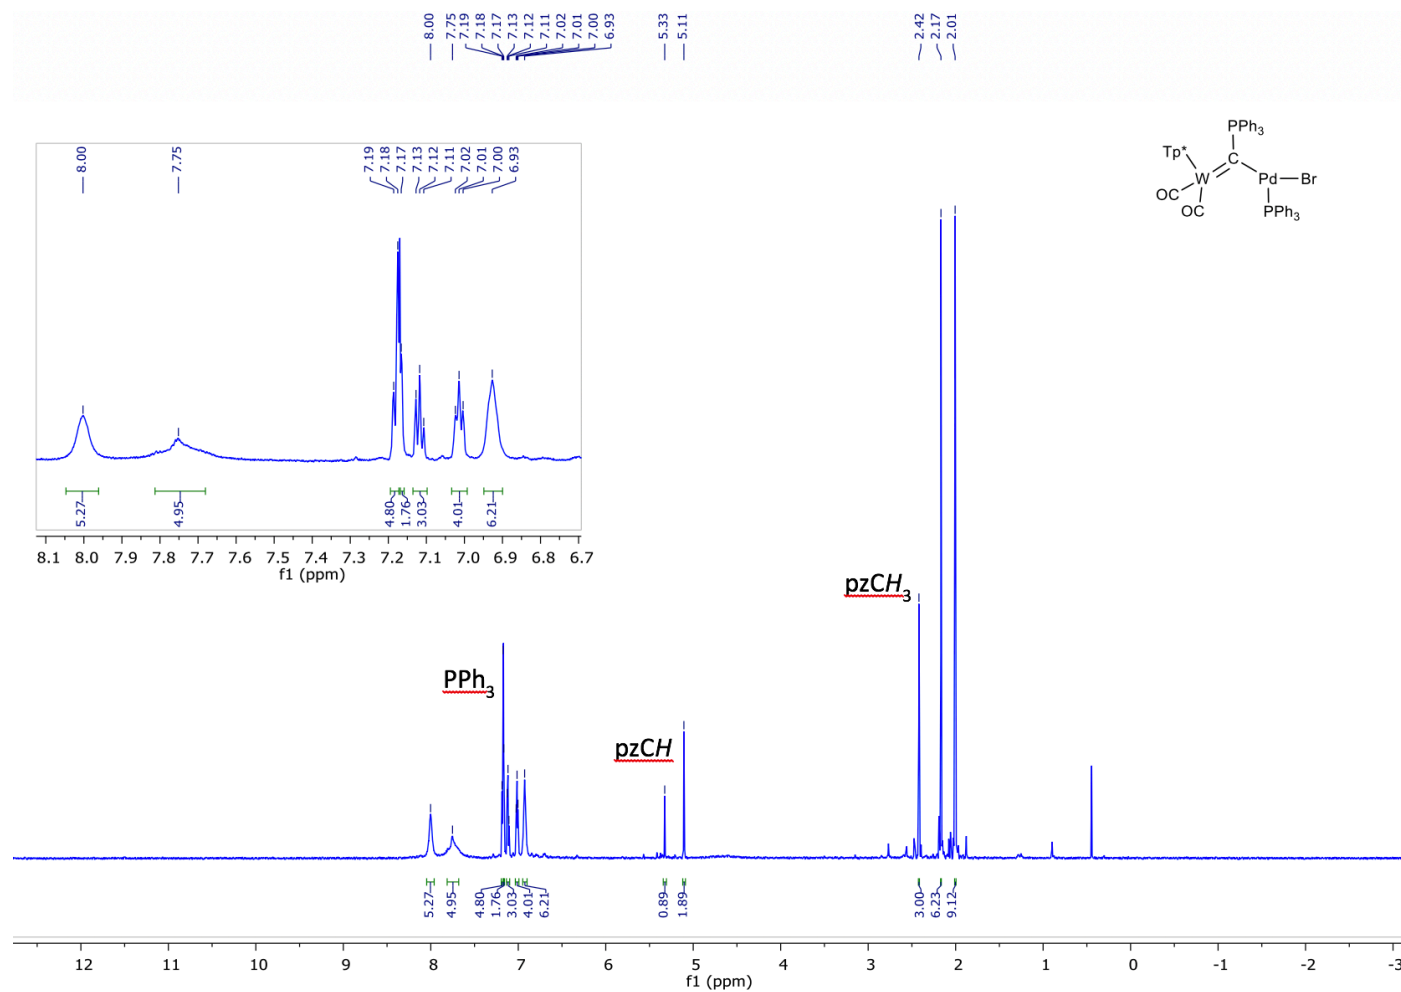

Figure S40.  $^1\text{H}$  NMR Spectrum of  $[\text{WPd}(\mu\text{-CPPH}_3)\text{Br}(\text{CO})_2(\text{PPh}_3)(\text{Tp}^*)]$  (7) (400 MHz,  $\text{CDCl}_3$ ,  $25^\circ\text{C}$ )



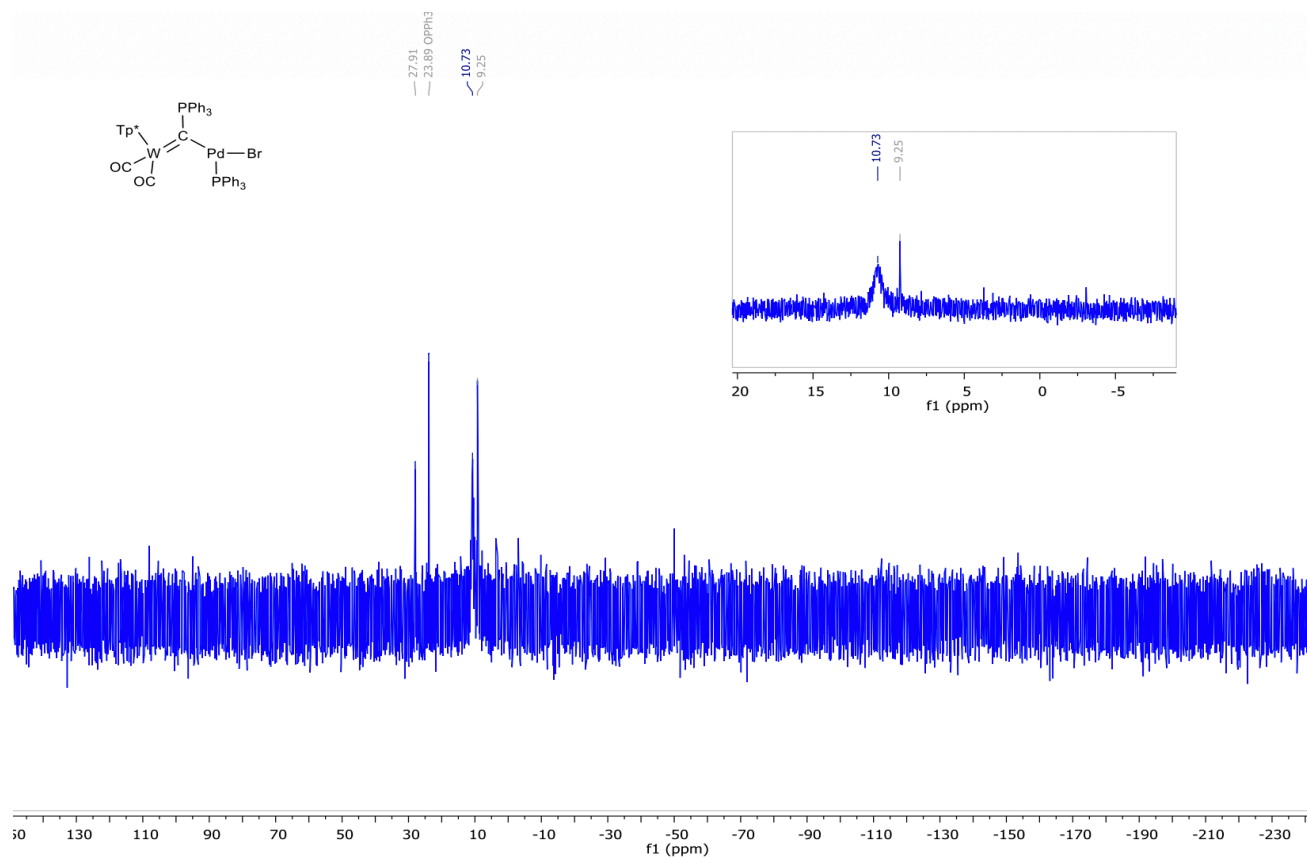

Figure S41.  $^{31}\text{P}\{^1\text{H}\}$  NMR Spectrum of  $[\text{WPd}(\mu\text{-CPPH}_3)\text{Br}(\text{CO})_2(\text{PPh}_3)(\text{Tp}^*)]$  (7) (162 MHz,  $\text{CDCl}_3$ , 25 °C)

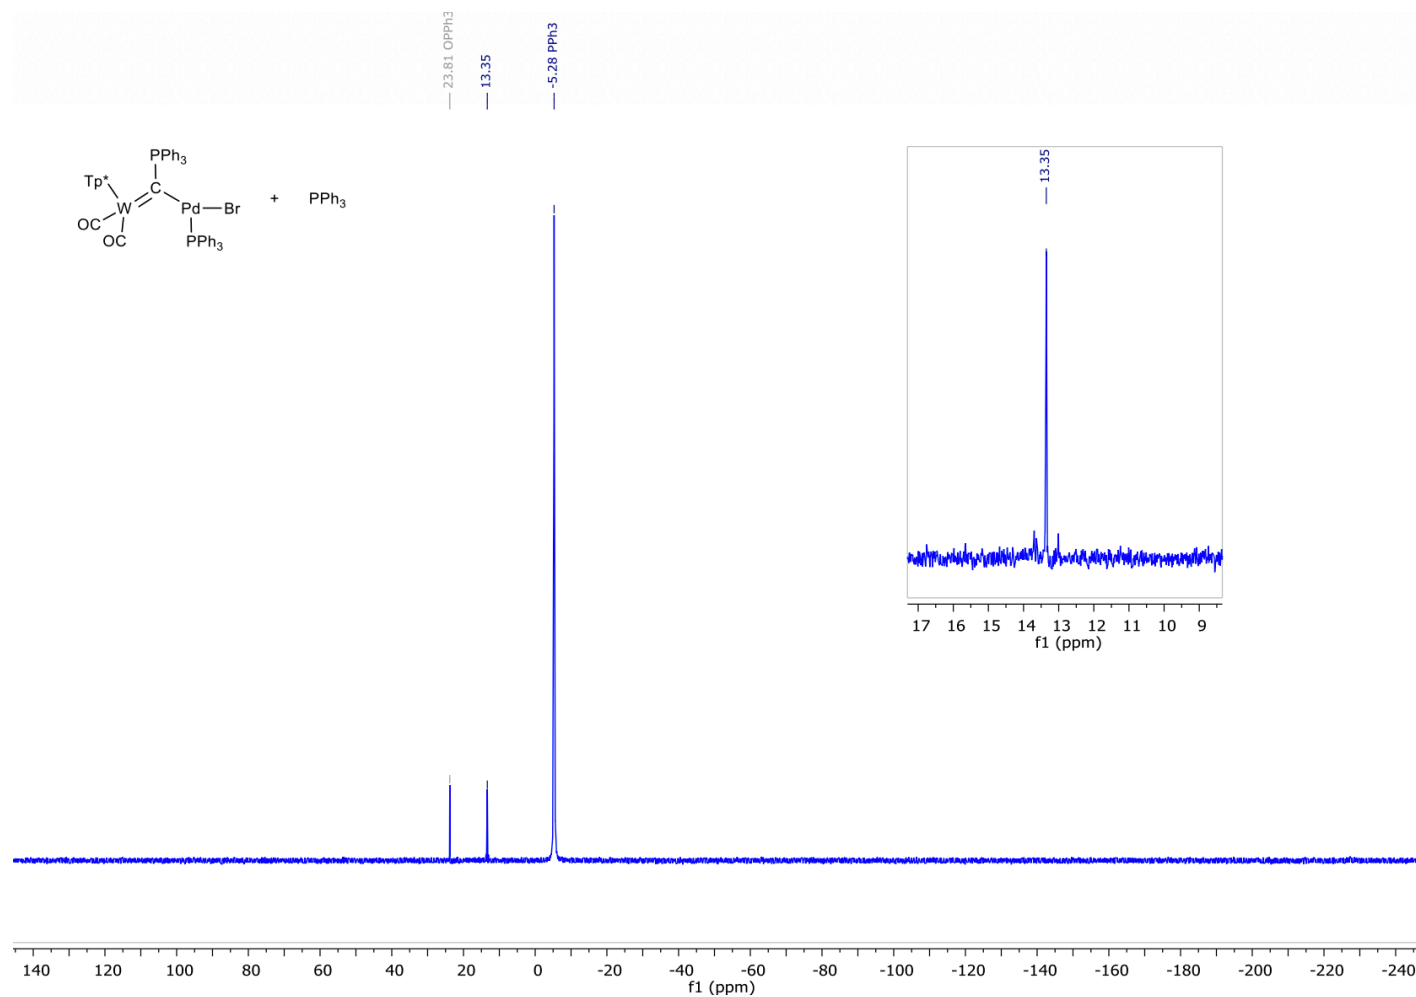

Figure S42.  $^{31}\text{P}\{^1\text{H}\}$  NMR Spectrum of  $[\text{WPd}(\mu\text{-CPPH}_3)\text{Br}(\text{CO})_2(\text{PPh}_3)(\text{Tp}^*)]$  (7) with excess  $\text{PPh}_3$  (162 MHz,  $\text{CDCl}_3$ , 25 °C)

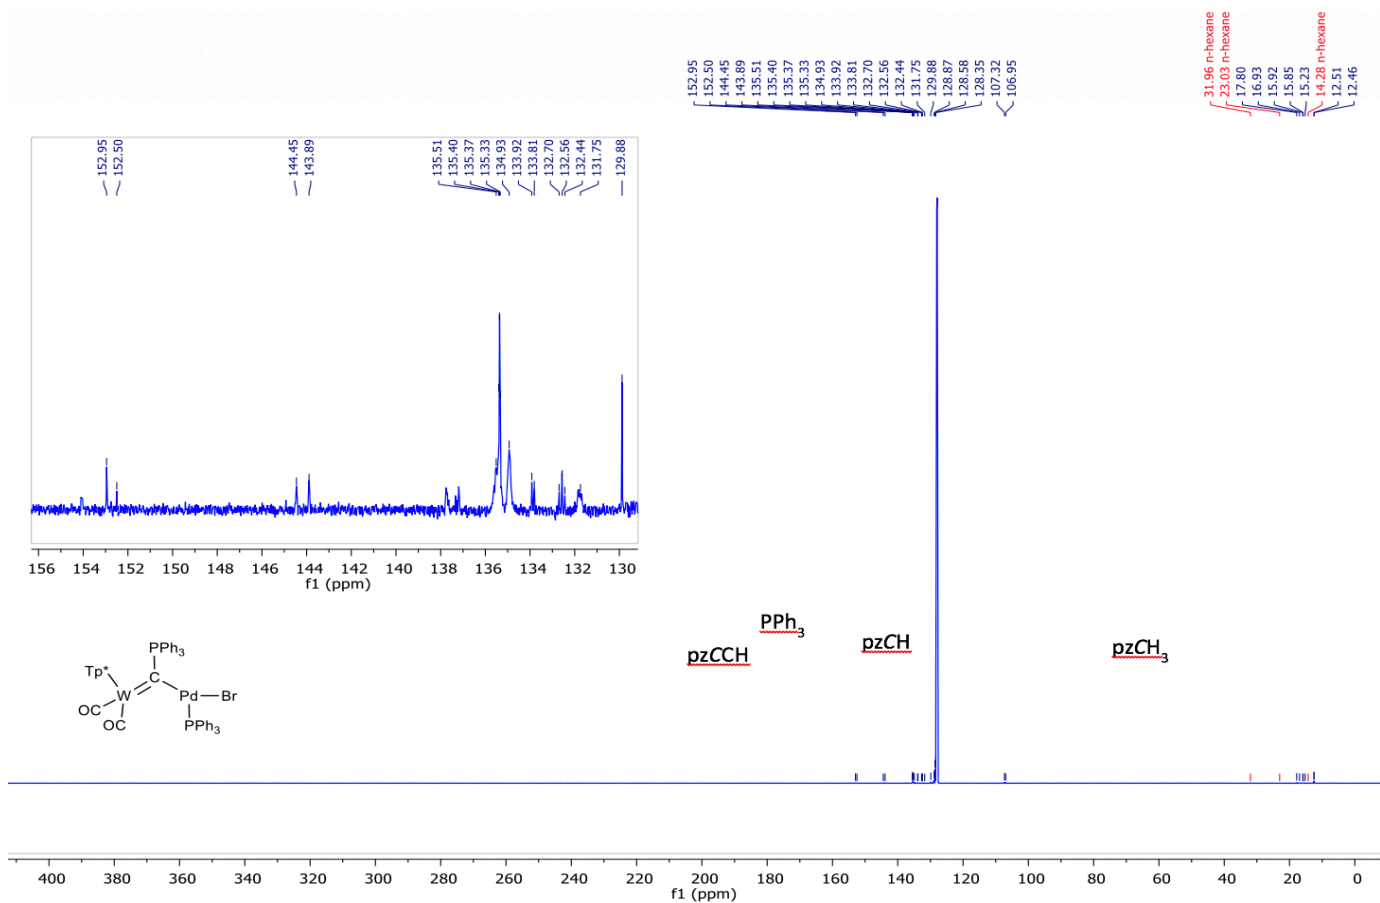

Figure S43.  $^{13}\text{C}\{^1\text{H}\}$  NMR Spectrum of  $[\text{WPd}(\mu\text{-CPPH}_3)\text{Br}(\text{CO})_2(\text{PPh}_3)(\text{Tp}^*)]$  (7) ( $176\text{ MHz}$ ,  $\text{CDCl}_3$ ,  $50^\circ\text{C}$ , sparingly soluble)

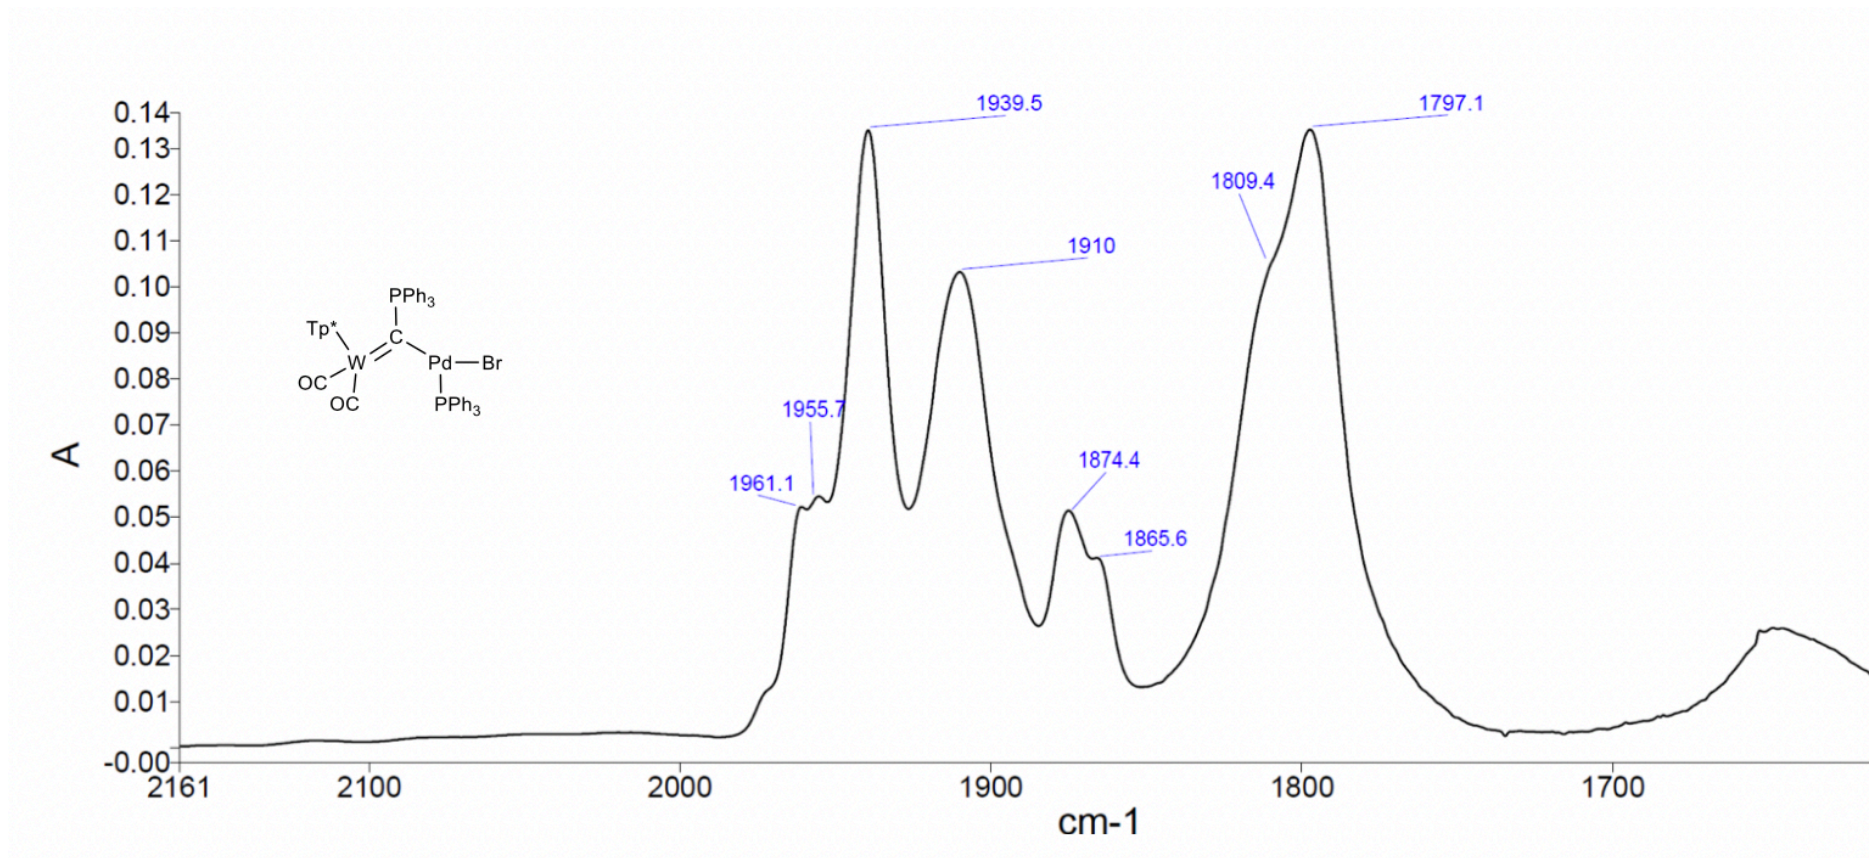

Figure S44. Infrared Spectrum of  $[\text{WPd}(\mu\text{-CPPh}_3)\text{Br}(\text{CO})_2(\text{PPh}_3)(\text{Tp}^*)]$  (7) (THF, 25 °C)

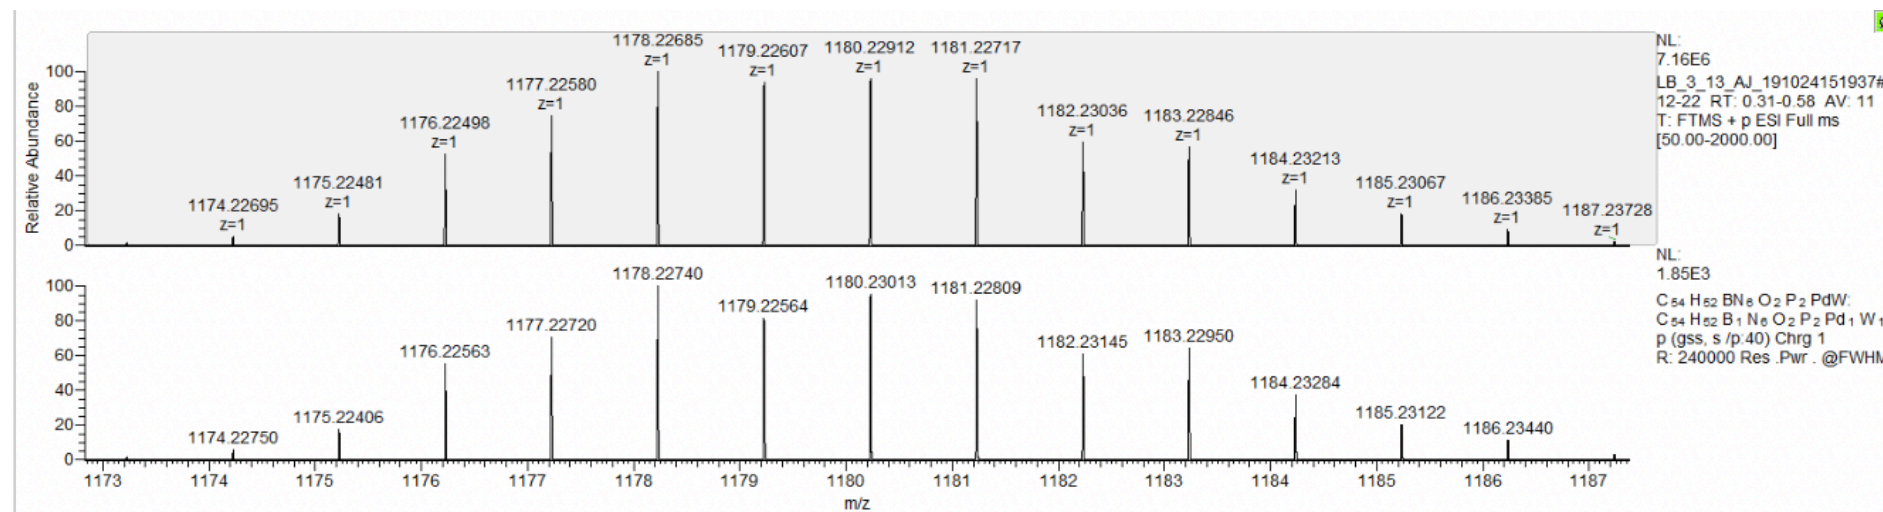

Figure S45. Mass Spectrum of  $[\text{WPd}(\mu\text{-CPPH}_3)\text{Br}(\text{CO})_2(\text{PPh}_3)(\text{Tp}^*)]$  (7) (ESI)

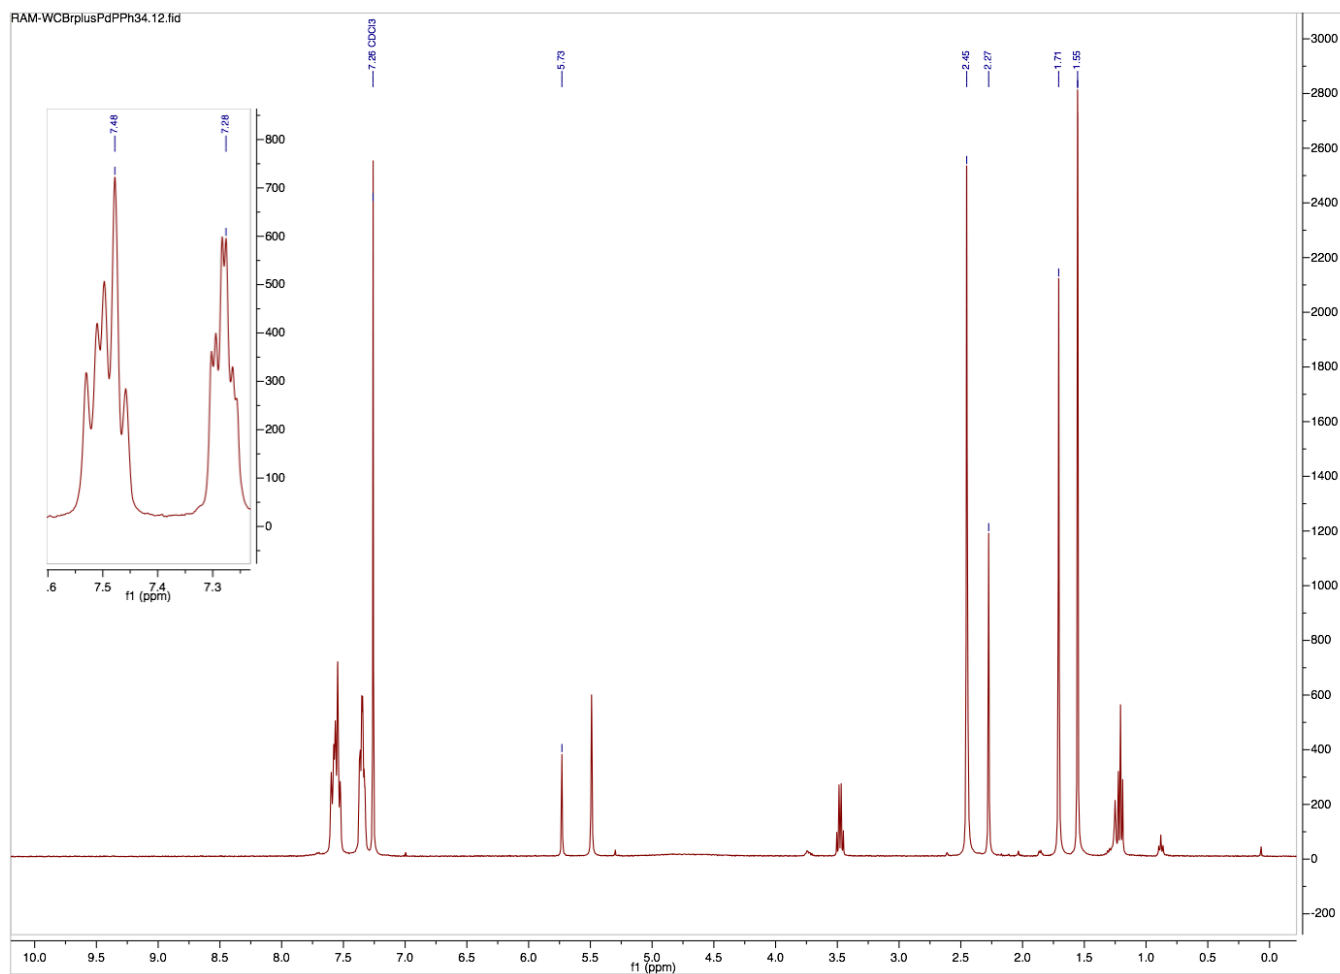

Figure S46.  $^1\text{H}$  NMR Spectrum of  $[\text{WPd}(\mu\text{-CPPH}_3)\text{Br}(\text{CO})_2(\text{PPh}_3)(\text{Tp}^*)]$  (8) (400 MHz,  $\text{CDCl}_3$ , 25  $^\circ\text{C}$ )

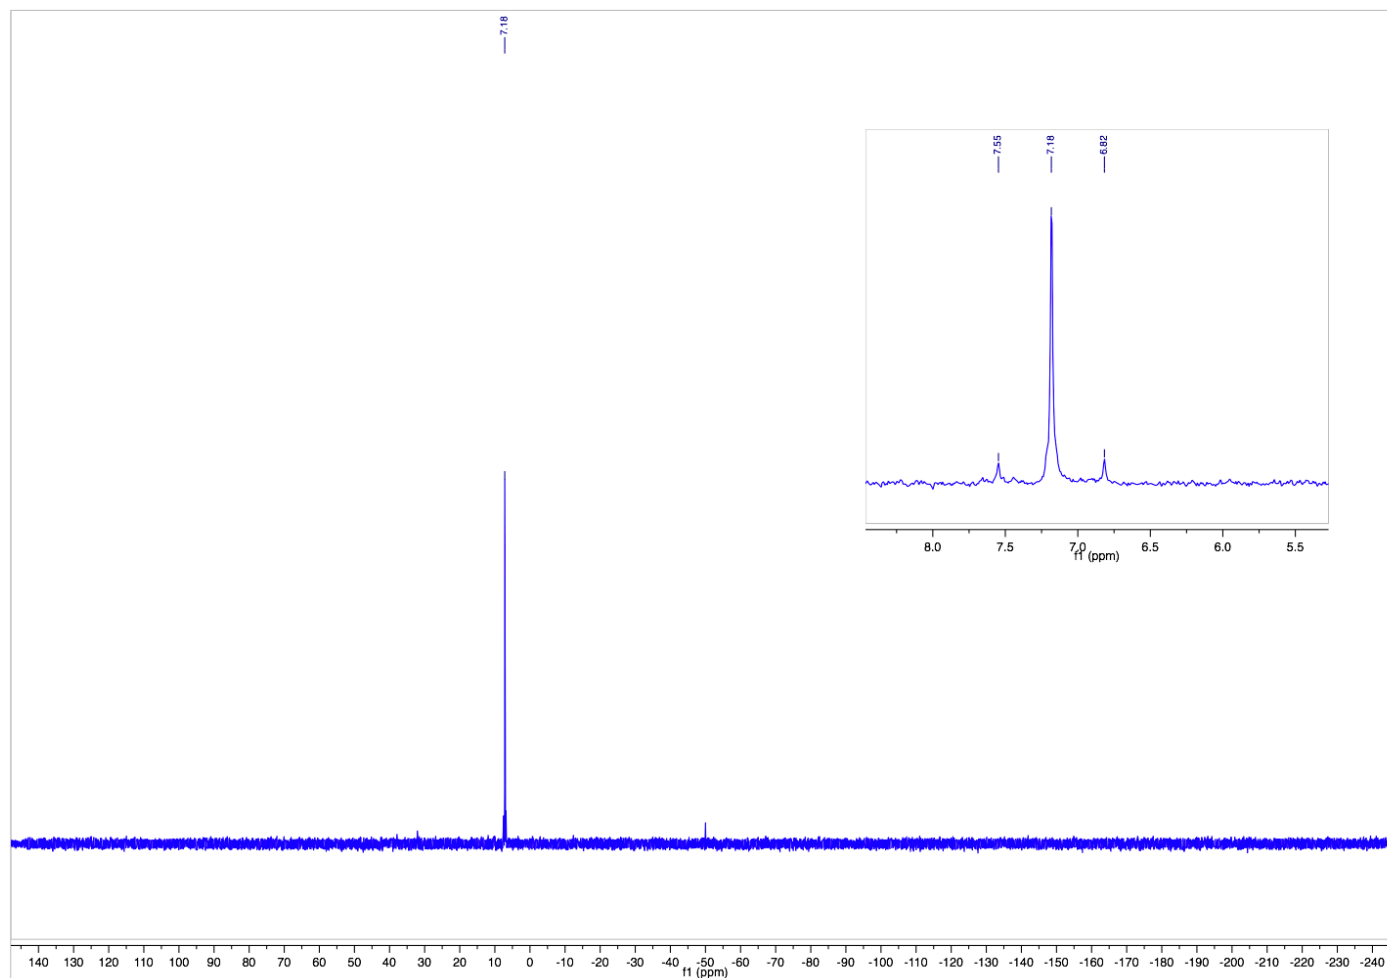

Figure S47.  $^{31}\text{P}\{^1\text{H}\}$  NMR Spectrum of  $[\text{WPd}(\mu\text{-CPPH}_3)\text{Br}(\text{CO})_2(\text{Tp}^*)]$  (8) (176 MHz,  $\text{C}_6\text{D}_6$ , 25 °C)

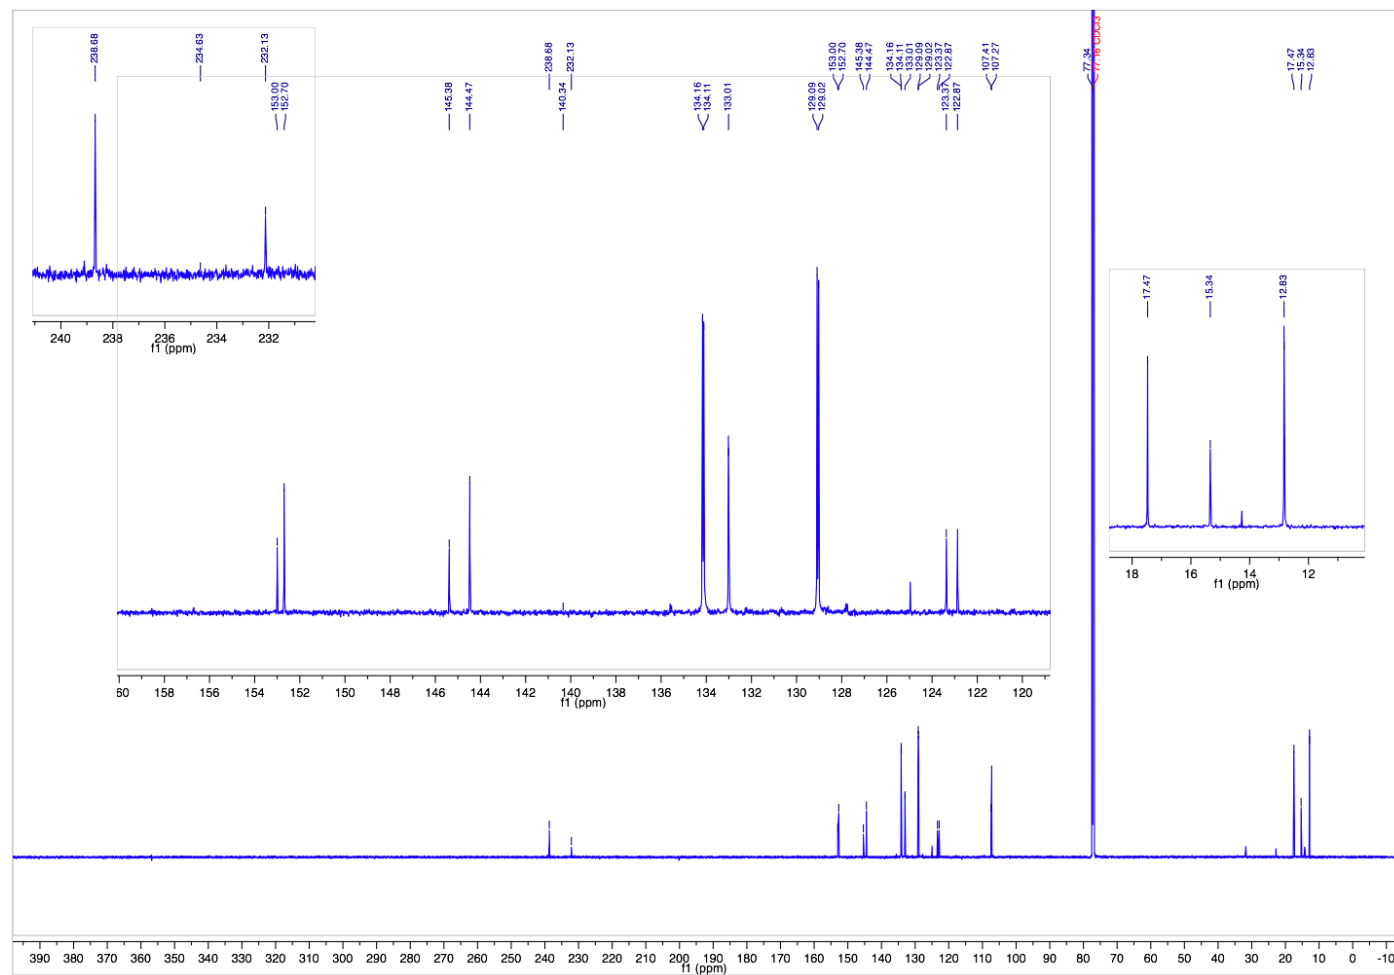

Figure S48.  $^{13}\text{C}\{^1\text{H}\}$  NMR Spectrum of  $[\text{WPd}(\mu\text{-CPPH}_3)\text{Br}(\text{CO})_2(\text{PPh}_3)(\text{Tp}^*)]$  (**8**) (141 MHz,  $\text{CDCl}_3$ , 25 °C)



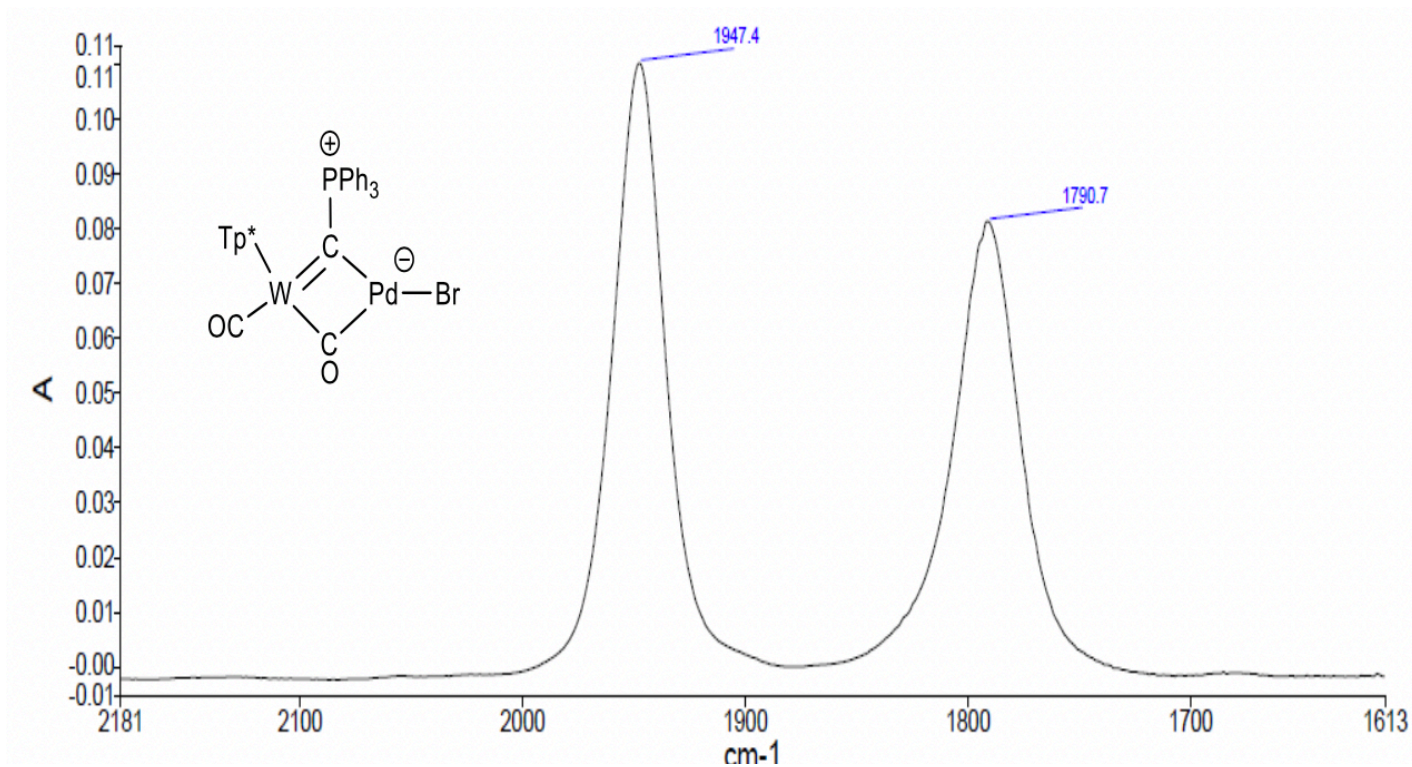

Figure S49. Infrared Spectrum of [WPd(μ-CPPh<sub>3</sub>)Br(CO)<sub>2</sub>(Tp\*)] (8) (CH<sub>2</sub>Cl<sub>2</sub>, 25 °C)

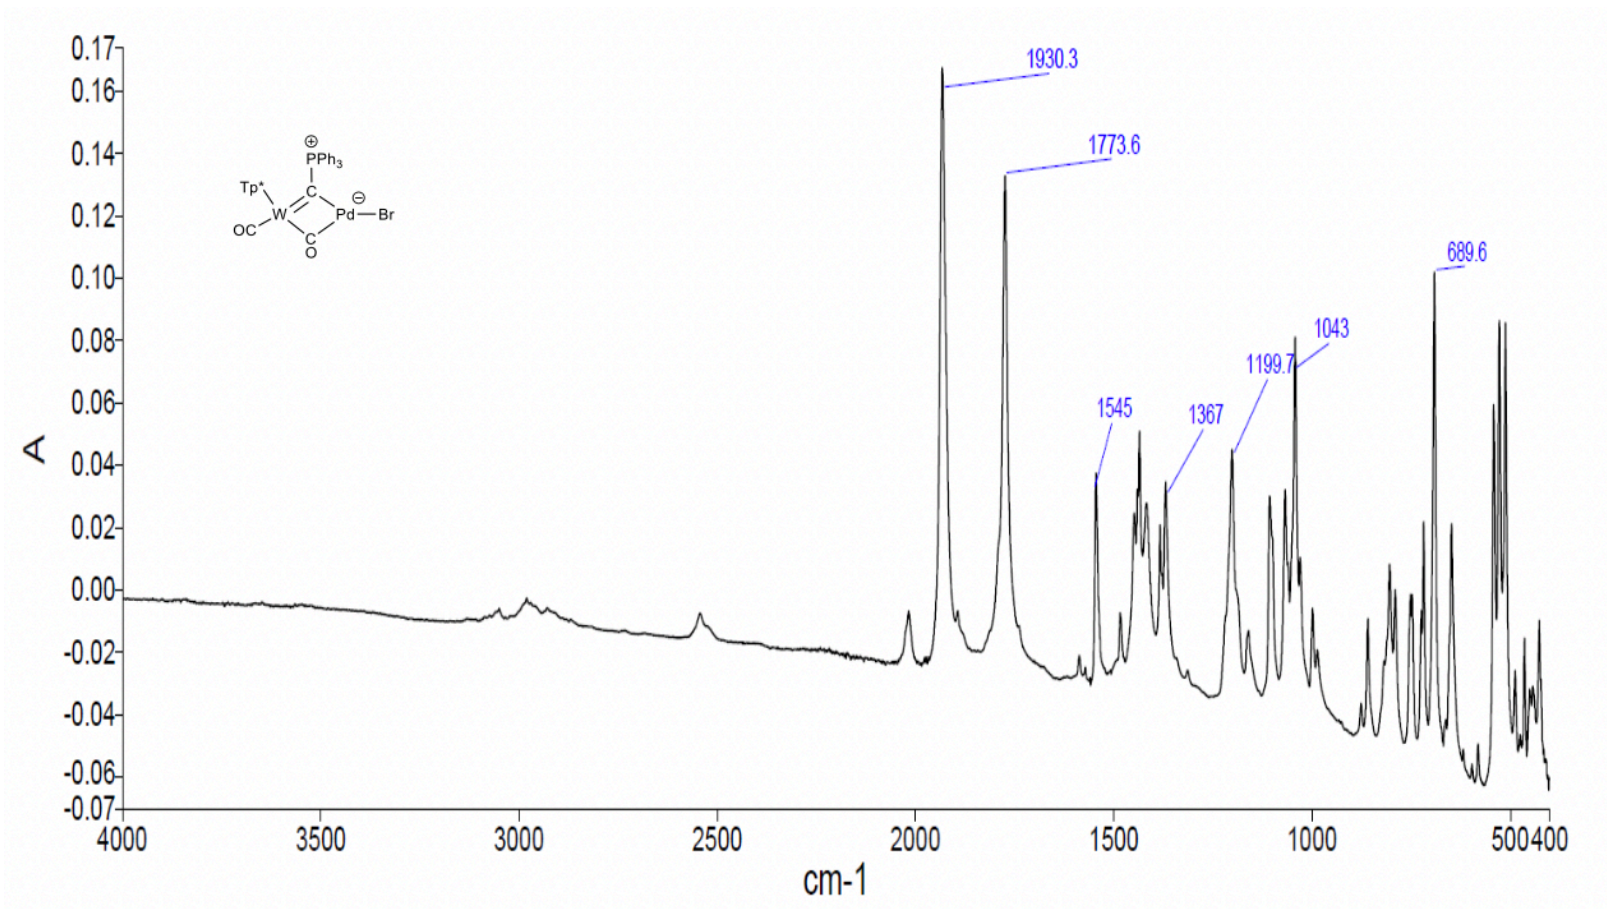

Figure S50. Infrared Spectrum of  $[WPd(\mu-CPPH_3)Br(CO)_2(Tp^*)]$  (8) (ATR)

## Selected Spectra for Propargylidynes – see also Reference 13

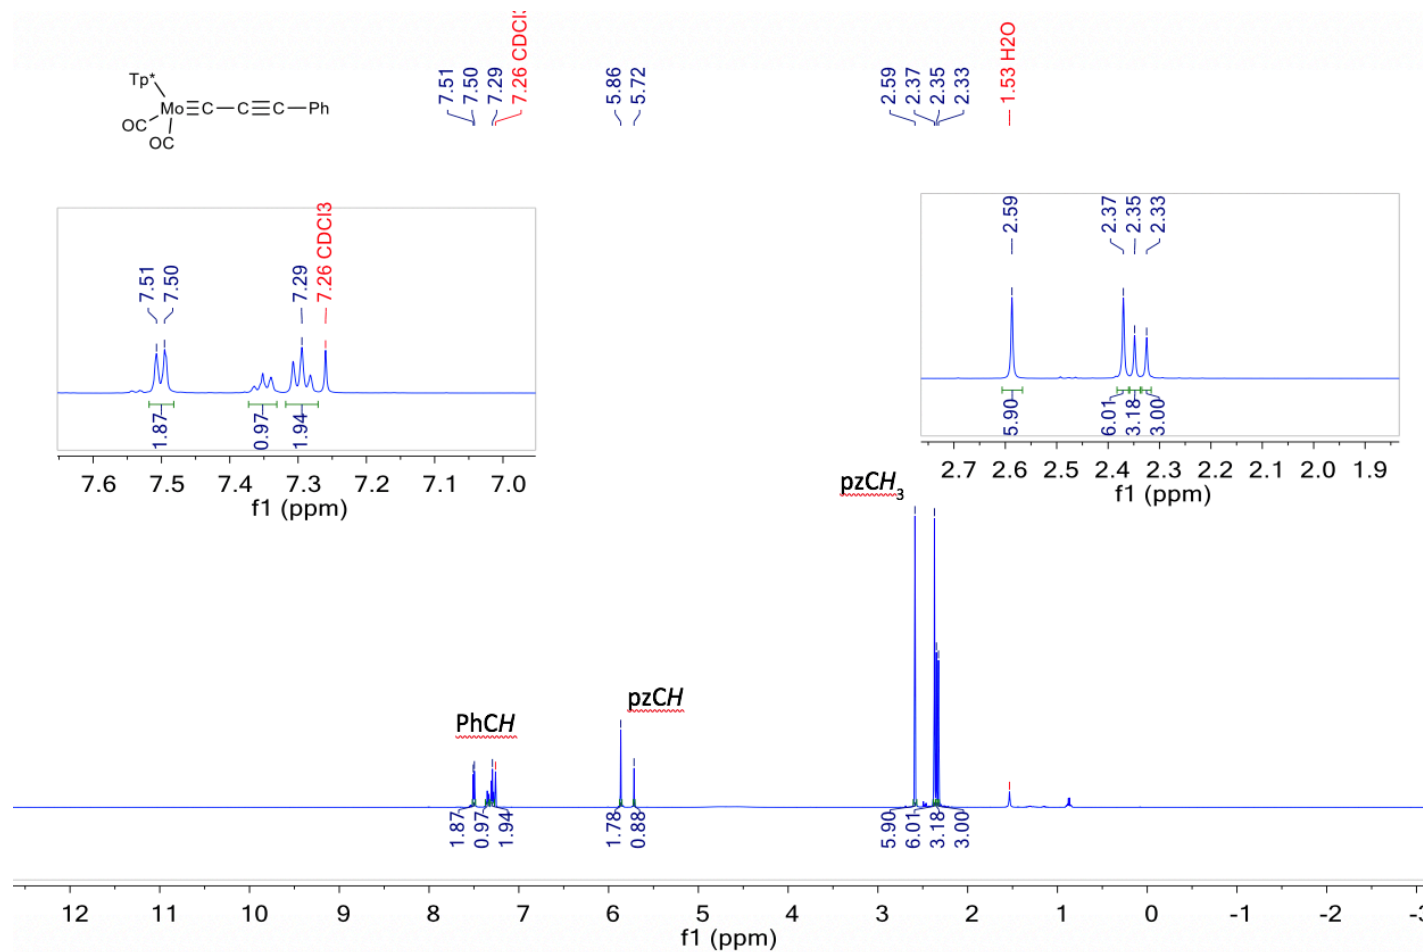Figure S51. <sup>1</sup>H NMR Spectrum of [(Tp\*)(CO)<sub>2</sub>Mo(=C-C≡C-Ph)] (600 MHz, CDCl<sub>3</sub>, 25 °C, δ):

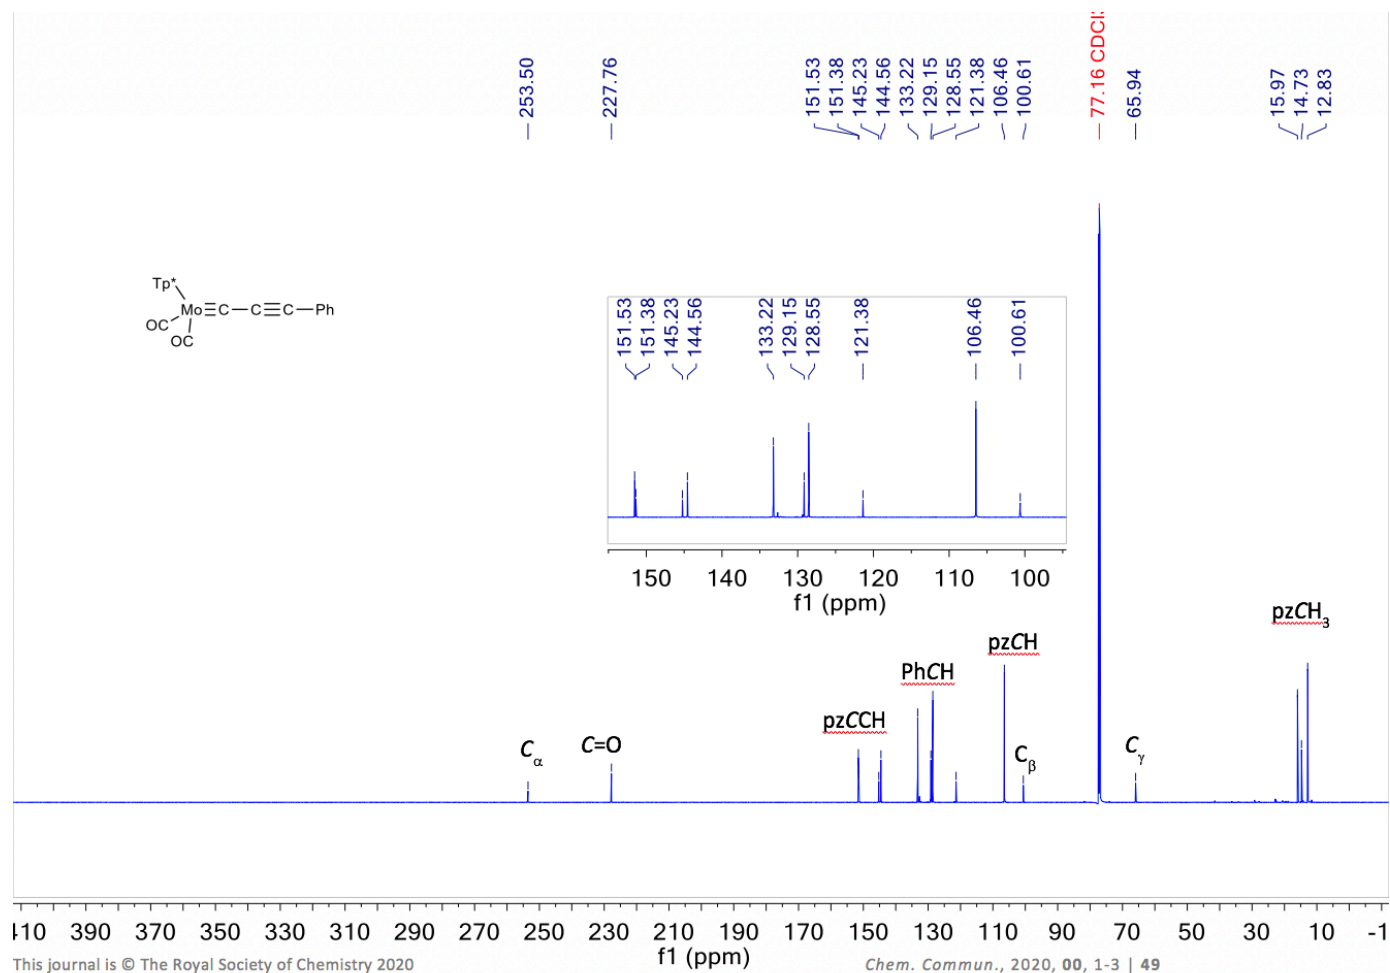

Figure S52.  $^{13}C$  NMR Spectrum of  $[(Tp^*)(CO)_2Mo(≡C-C≡C-Ph)]$  (151 MHz,  $CDCl_3$ , 25 °C,  $\delta$ ):

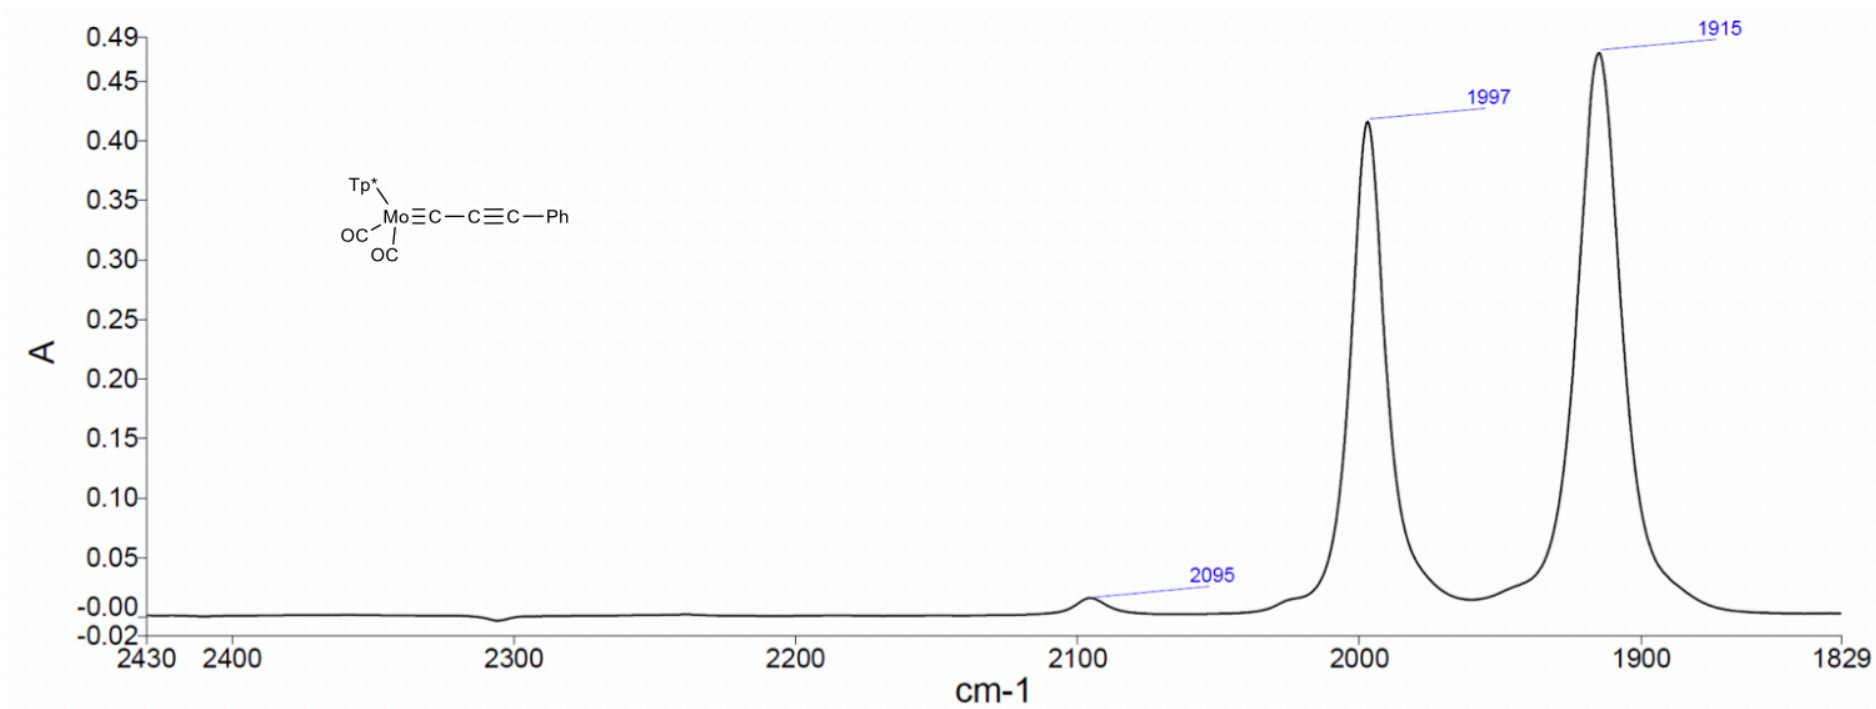

Figure S53. Infrared Spectrum of  $[(\text{Tp}^*)(\text{CO})_2\text{Mo}(\equiv\text{C}-\text{C}\equiv\text{C}-\text{Ph})]$  (NaCl,  $\text{CH}_2\text{Cl}_2$ , 25 °C)

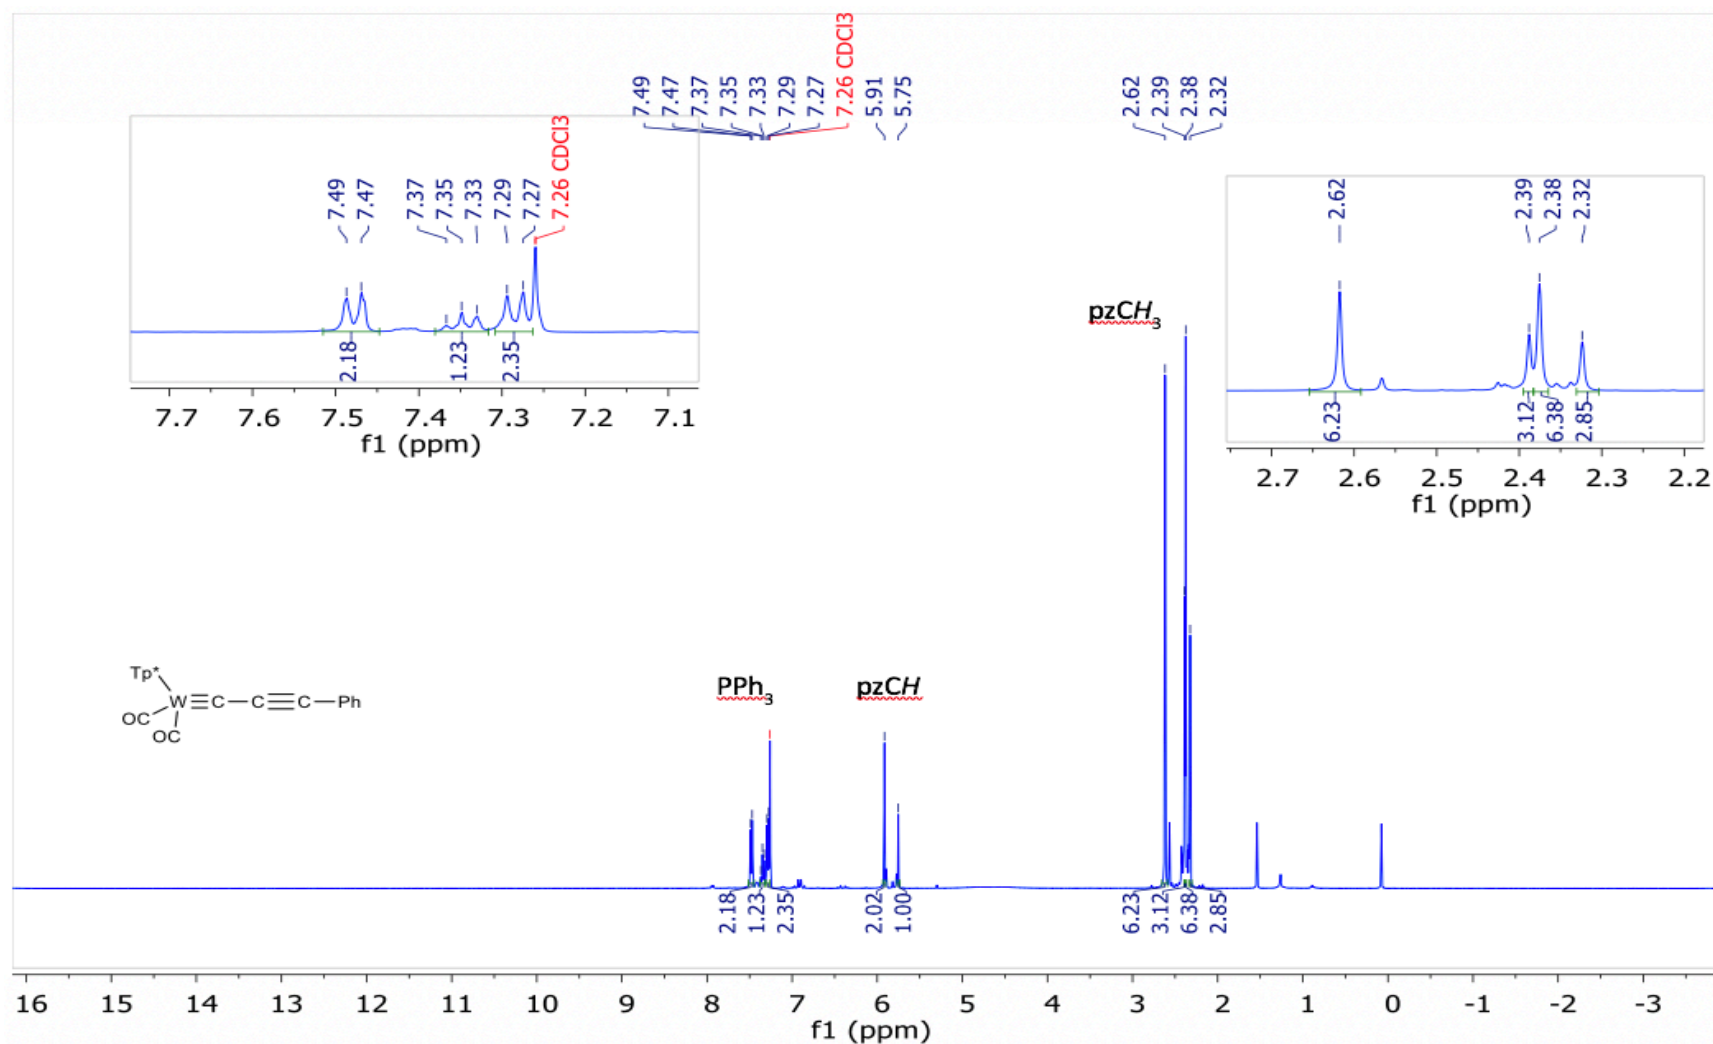

Figure S54.  $^1\text{H}$  NMR Spectrum of  $[(\text{Tp}^*)(\text{CO})_2\text{W}(=\text{C}-\text{C} \equiv \text{C}-\text{Ph})]$  (400 MHz,  $\text{CDCl}_3$ , 25 °C,  $\delta$ ):

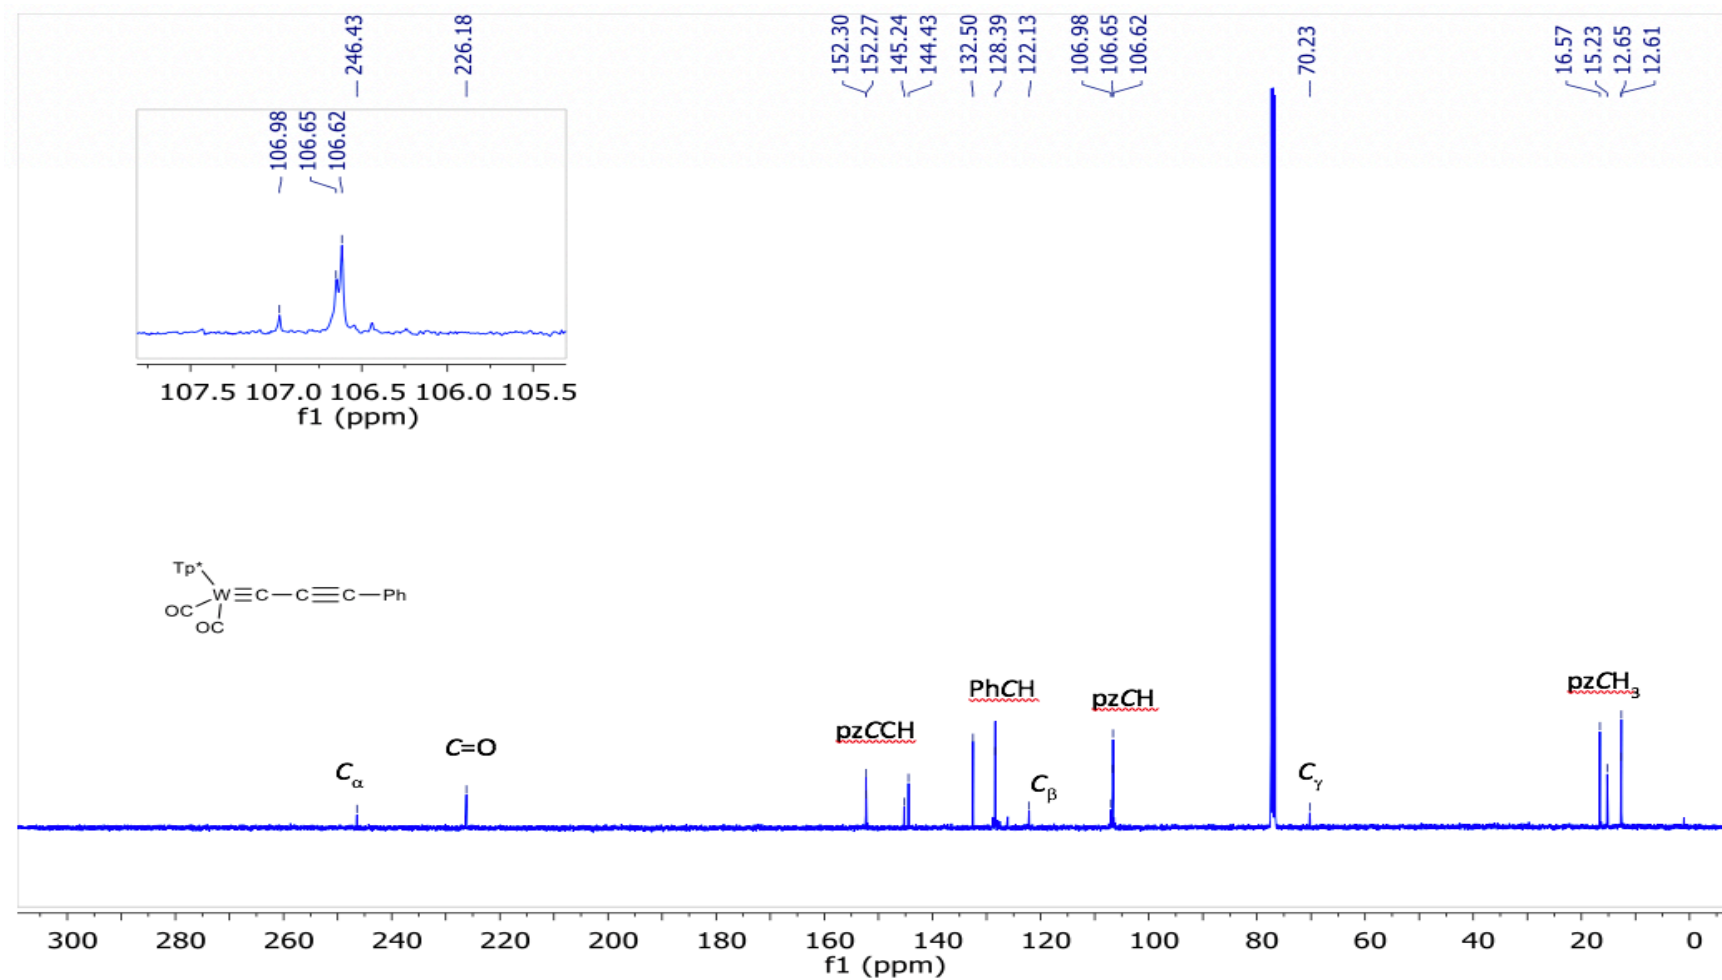

Figure S55.  $^{13}\text{C}$  NMR Spectrum of  $[(\text{Tp}^*)(\text{CO})_2\text{W}(=\text{C}-\text{C}\equiv\text{C}-\text{Ph})]$  (101 MHz,  $\text{CDCl}_3$ , 25 °C,  $\delta$ ):

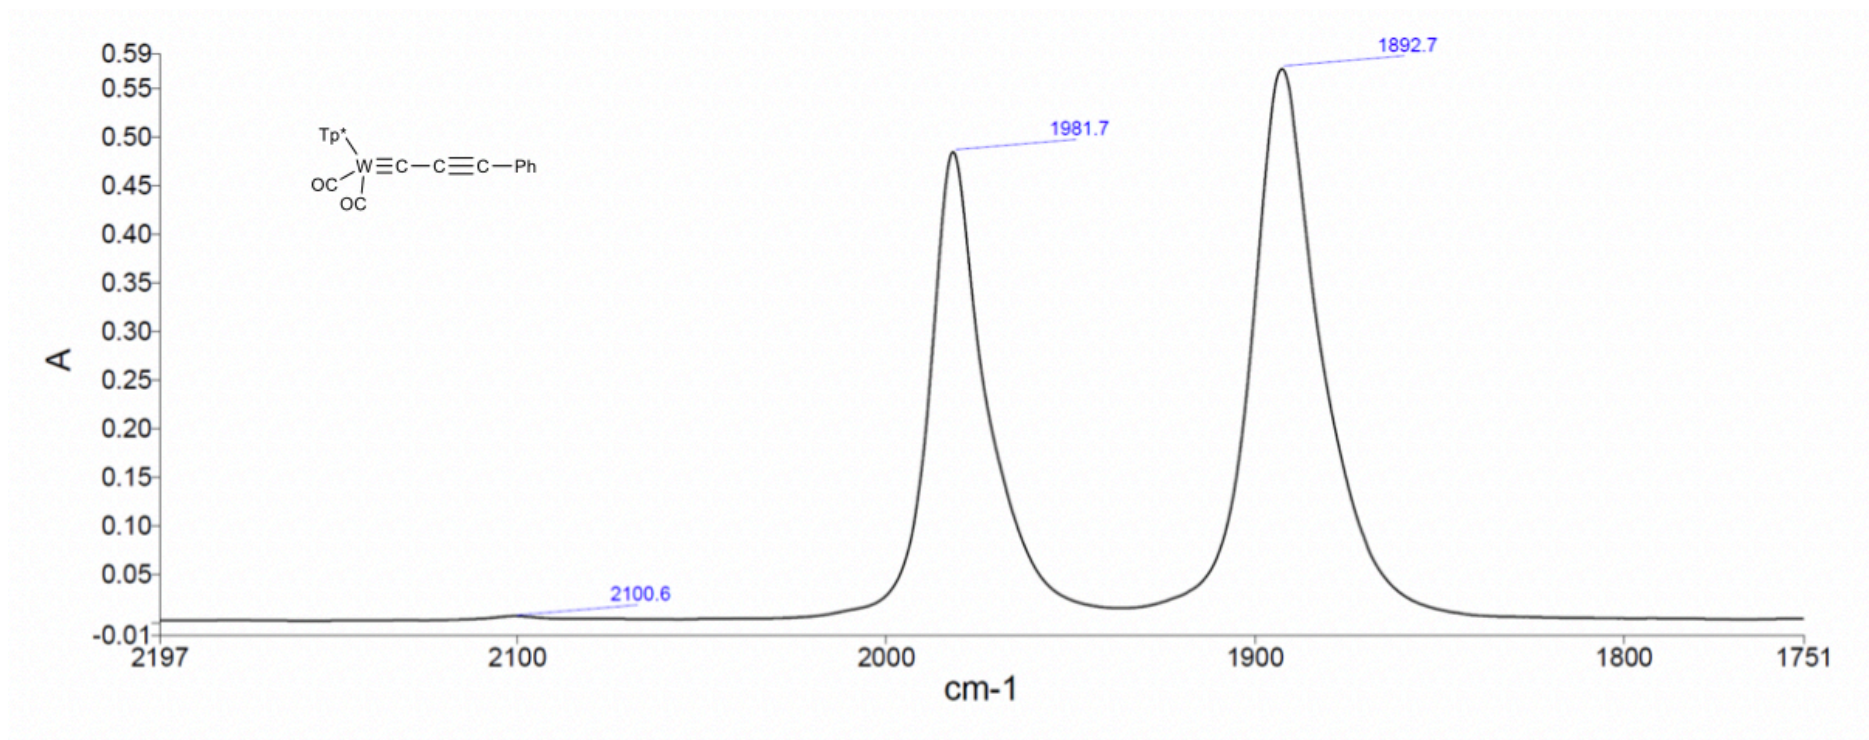

Figure S56. Infrared Spectrum of  $[(\text{Tp}^*)(\text{CO})_2\text{W}(\equiv\text{C}-\text{C}\equiv\text{C}-\text{Ph})]$  (NaCl,  $\text{CH}_2\text{Cl}_2$ , 25 °C)



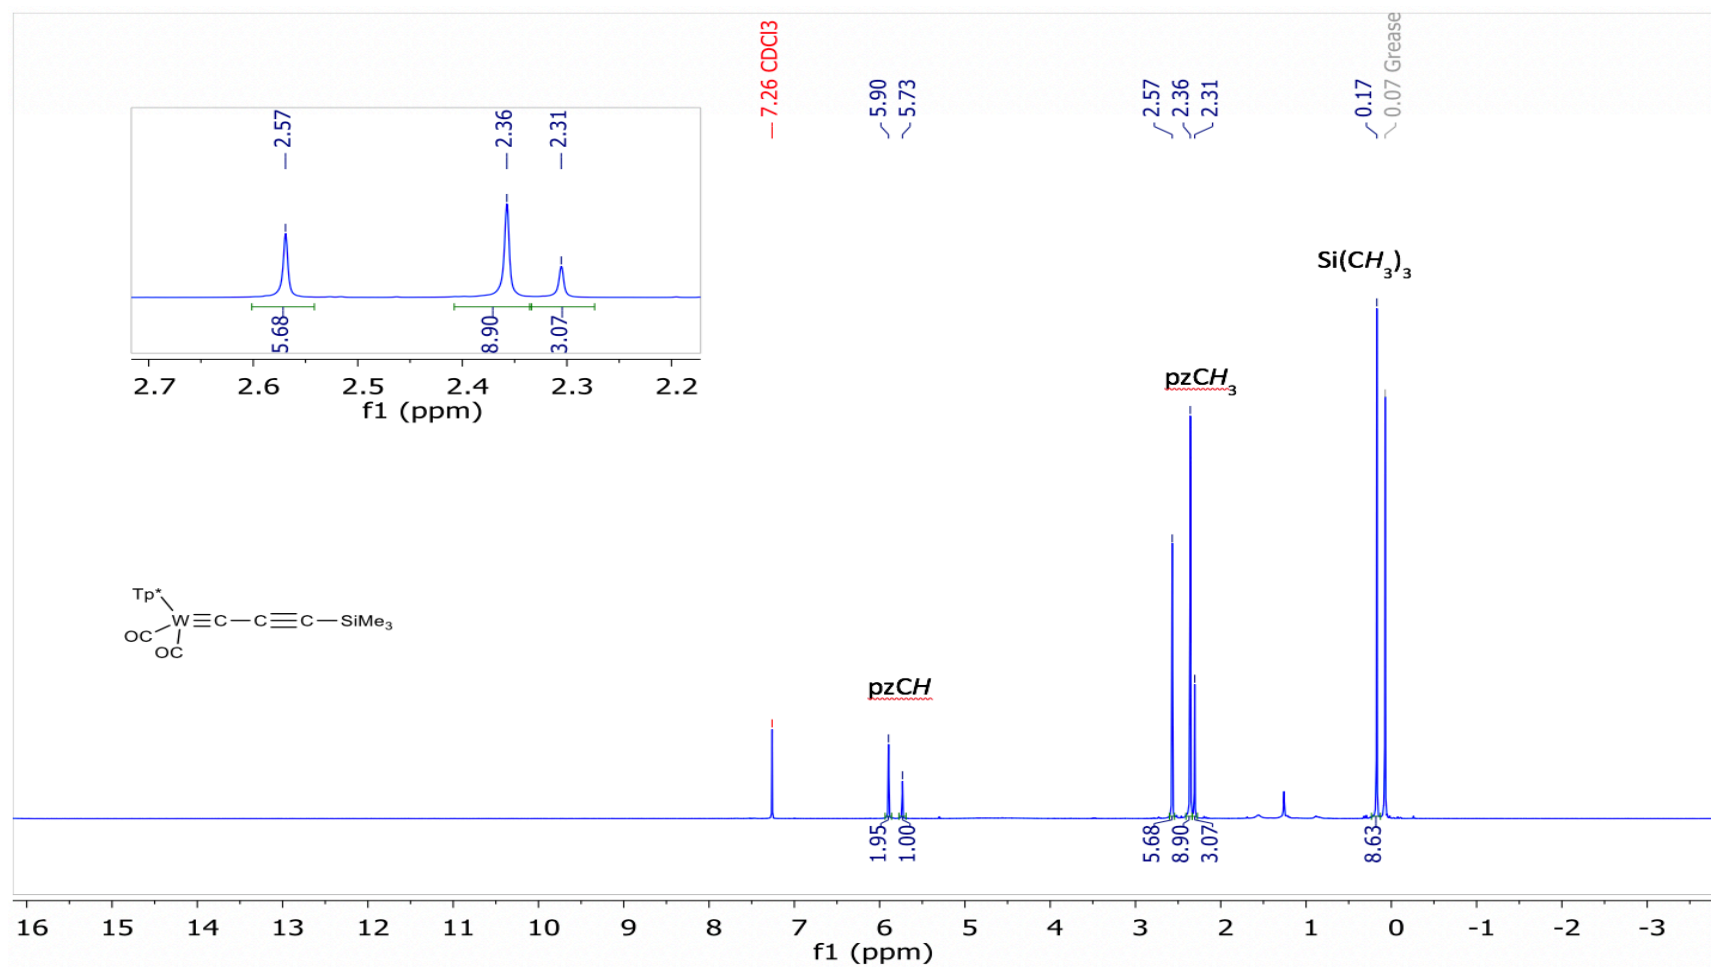

Figure S57.  $^1\text{H NMR}$  Spectrum of  $[(\text{Tp}^*)(\text{CO})_2\text{W}(\text{=C-C}\equiv\text{C-SiMe}_3)]$  (400 MHz,  $\text{CDCl}_3$ , 25 °C,  $\delta$ ):

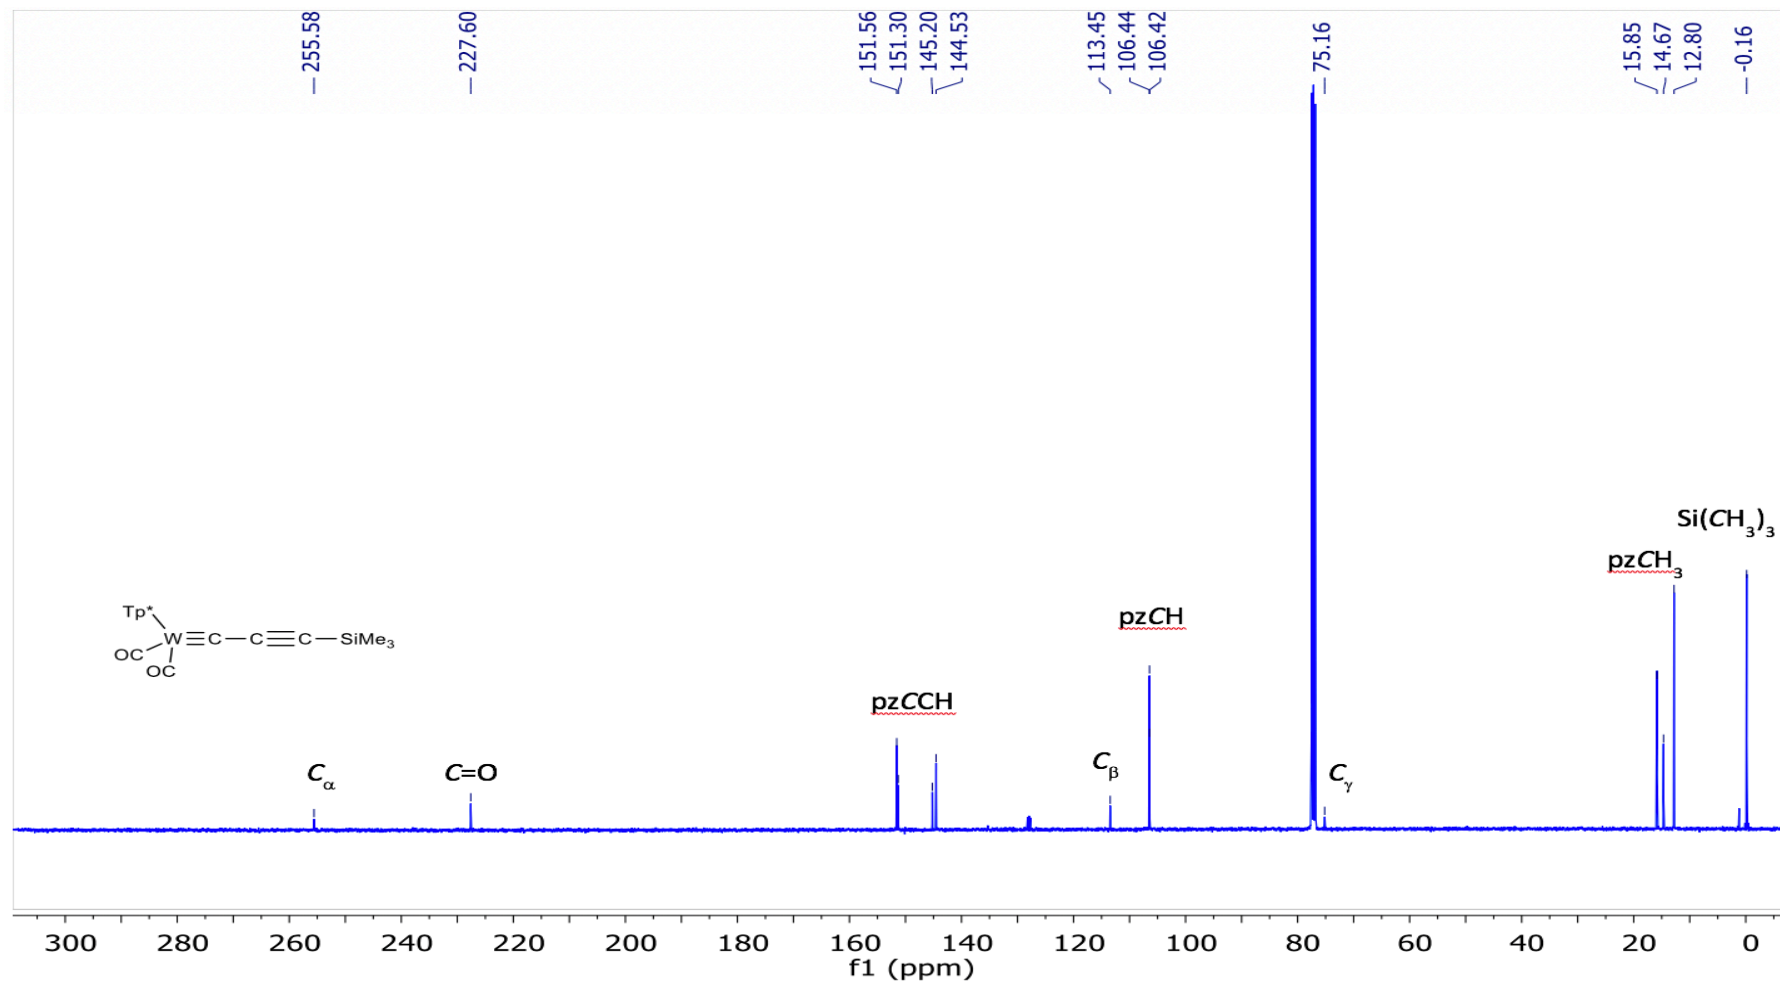

Figure S58.  $^{13}\text{C}$  NMR Spectrum of  $[(\text{Tp}^*)(\text{CO})_2\text{W}(=\text{C}-\text{C}\equiv\text{C}-\text{SiMe}_3)]$  (101 MHz,  $\text{CDCl}_3$ , 25 °C,  $\delta$ ):

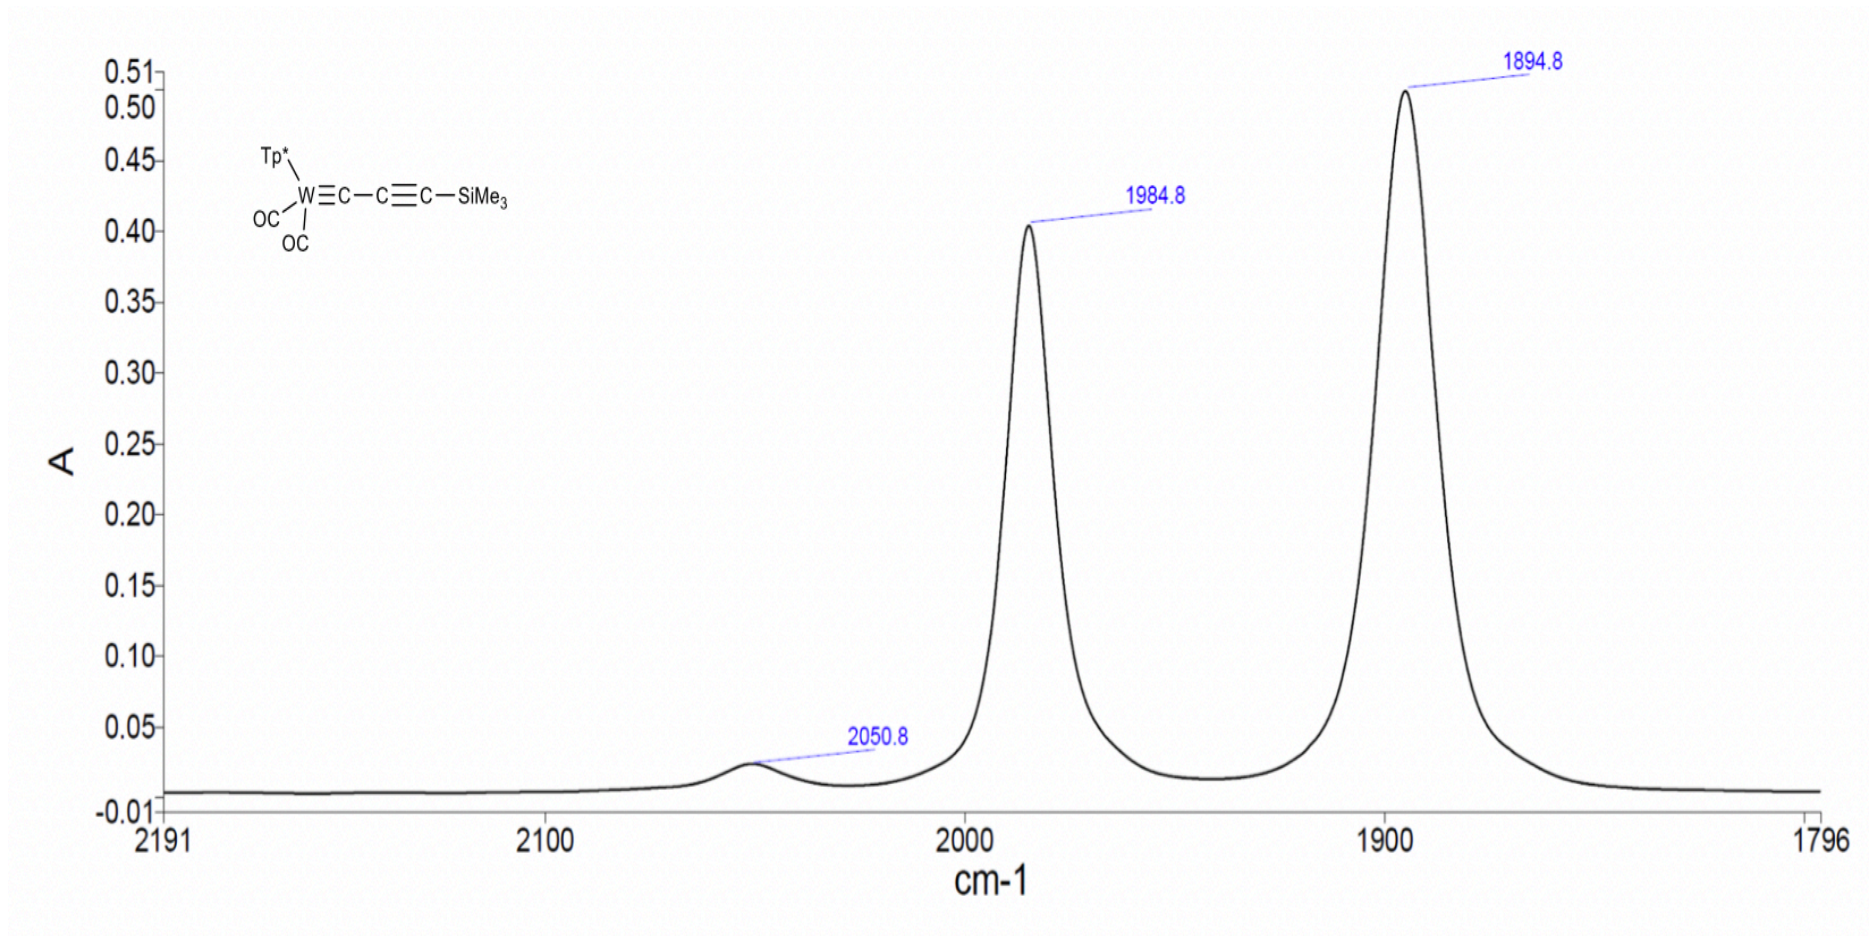

Figure S59. Infrared Spectrum of  $[(\text{Tp}^*)(\text{CO})_2\text{W}(\equiv\text{C}-\text{C}\equiv\text{C}-\text{SiMe}_3)]$  ( $\text{CH}_2\text{Cl}_2$ , 25 °C)

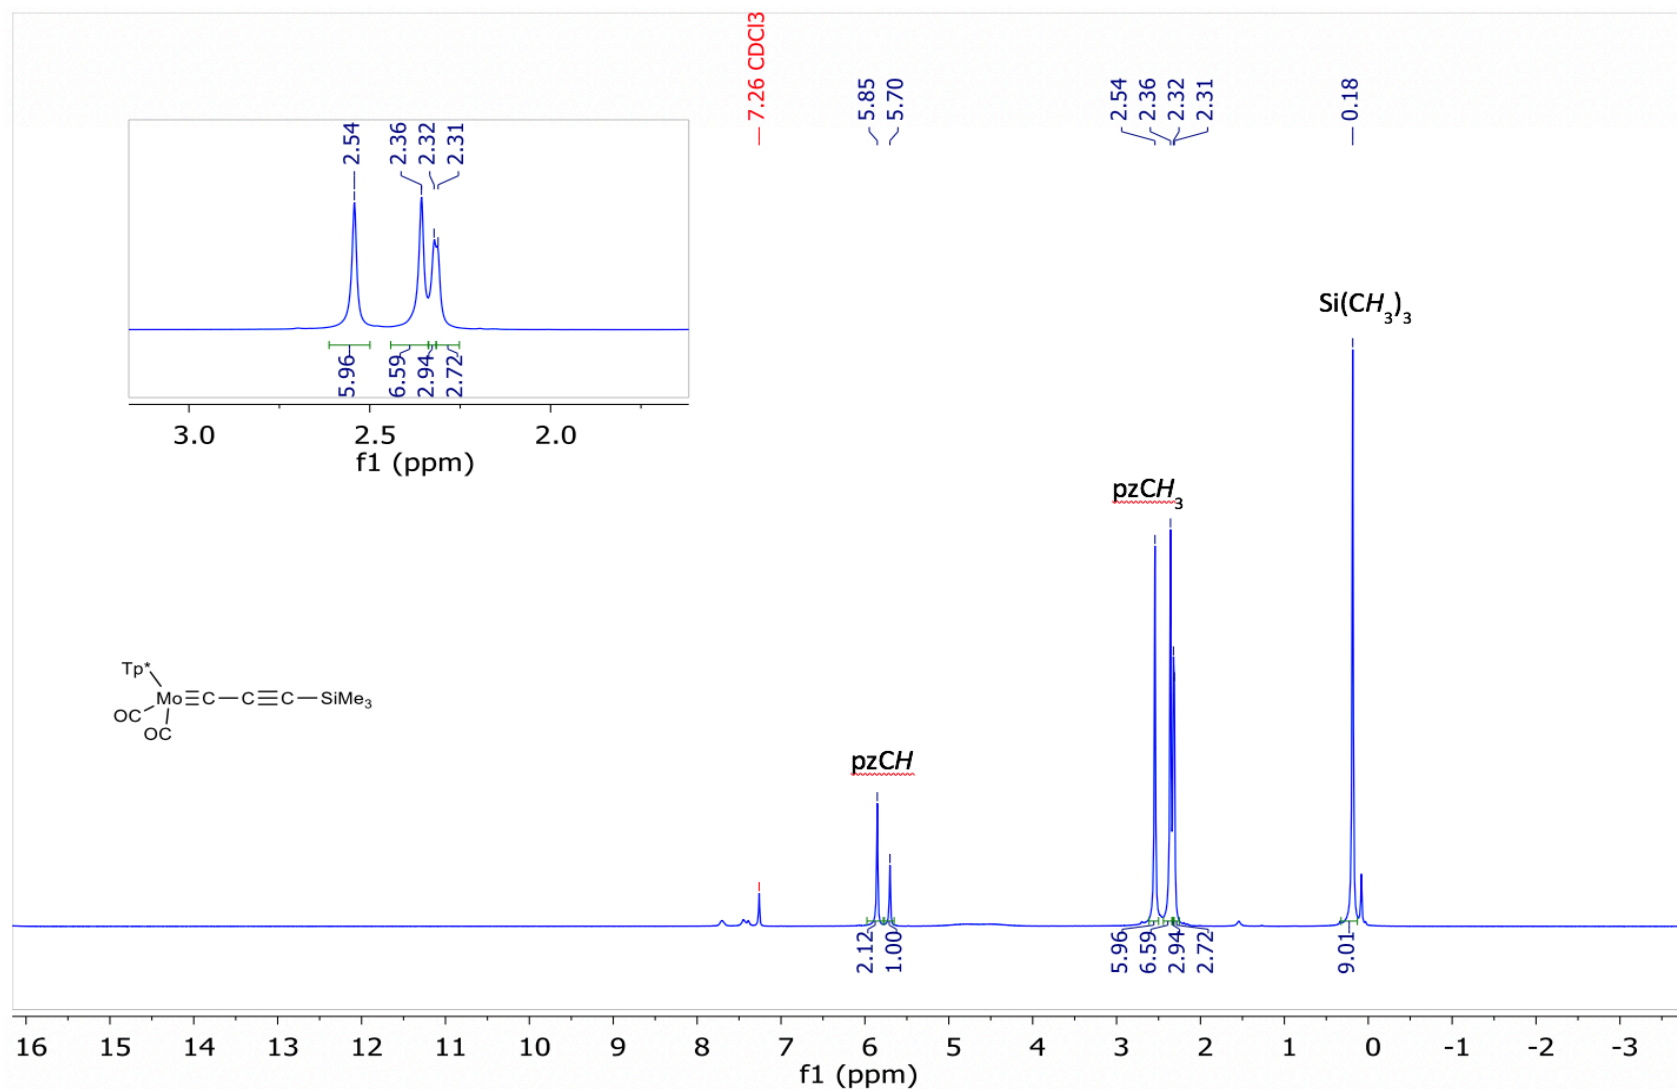

Figure S60.  $^1\text{H}$  NMR Spectrum of  $[(\text{Tp}^*)(\text{CO})_2\text{Mo}(\text{=C-C}\equiv\text{C-SiMe}_3)]$  (600 MHz,  $\text{CDCl}_3$ , 25 °C,  $\delta$ ):

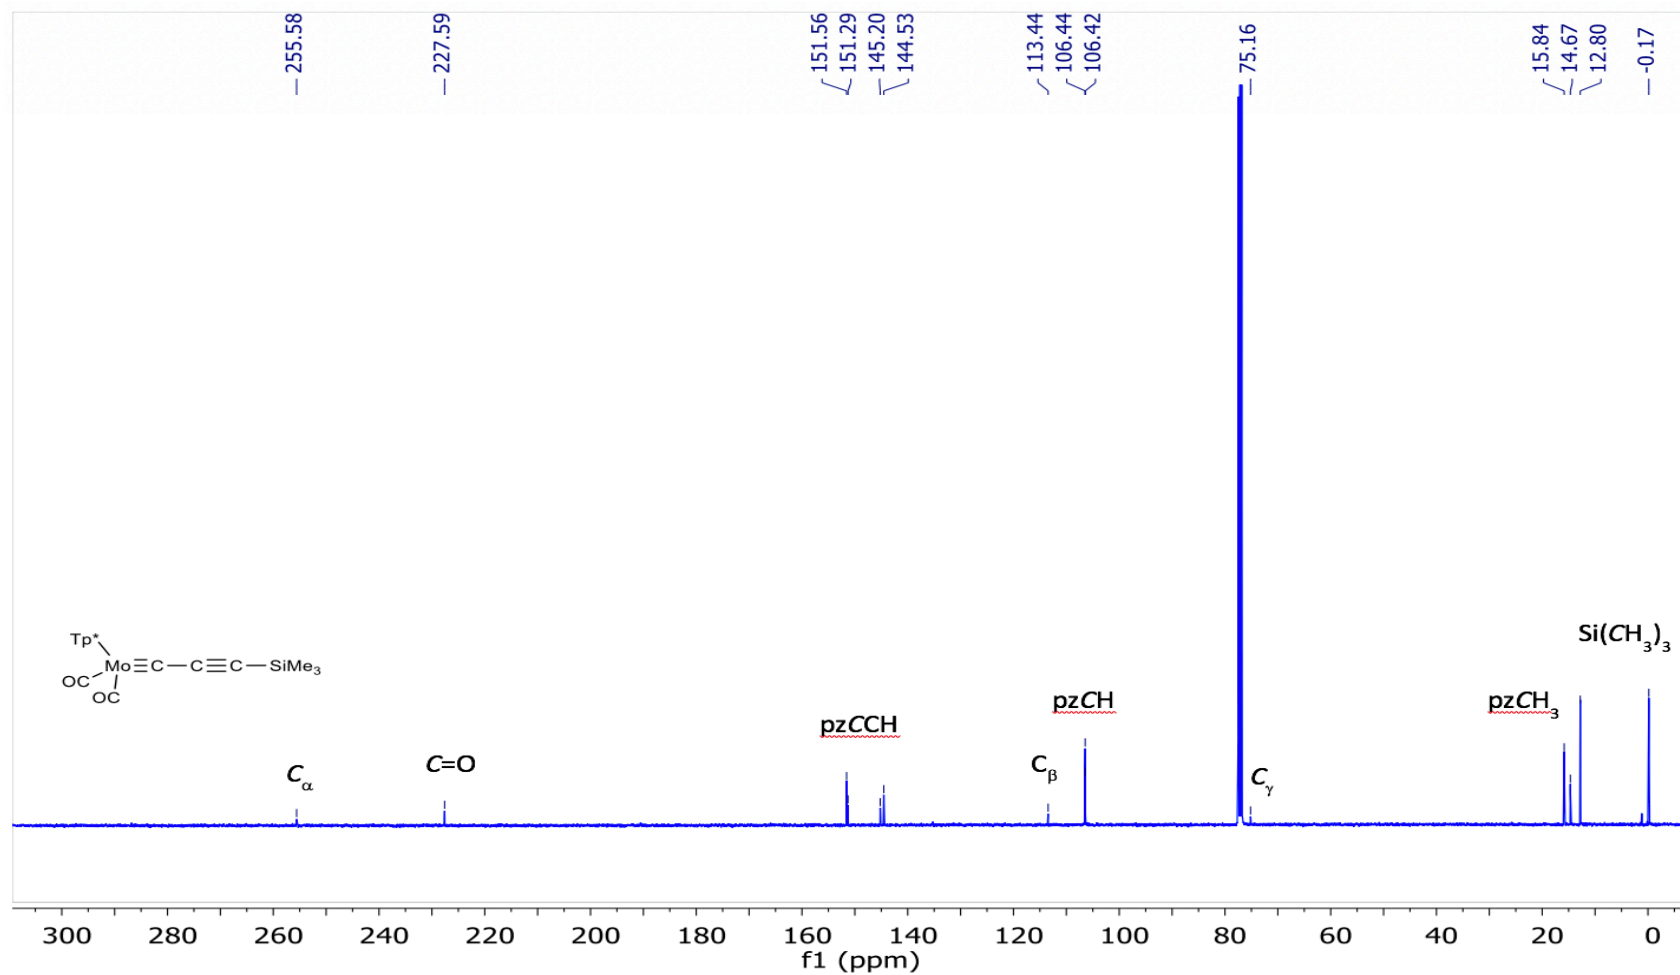

Figure S61.  $^{13}\text{C}$  NMR Spectrum of  $[(\text{Tp}^*)(\text{CO})_2\text{Mo}(\equiv\text{C}-\text{C}\equiv\text{C}-\text{SiMe}_3)]$  (151 MHz,  $\text{CDCl}_3$ , 25 °C,  $\delta$ ):

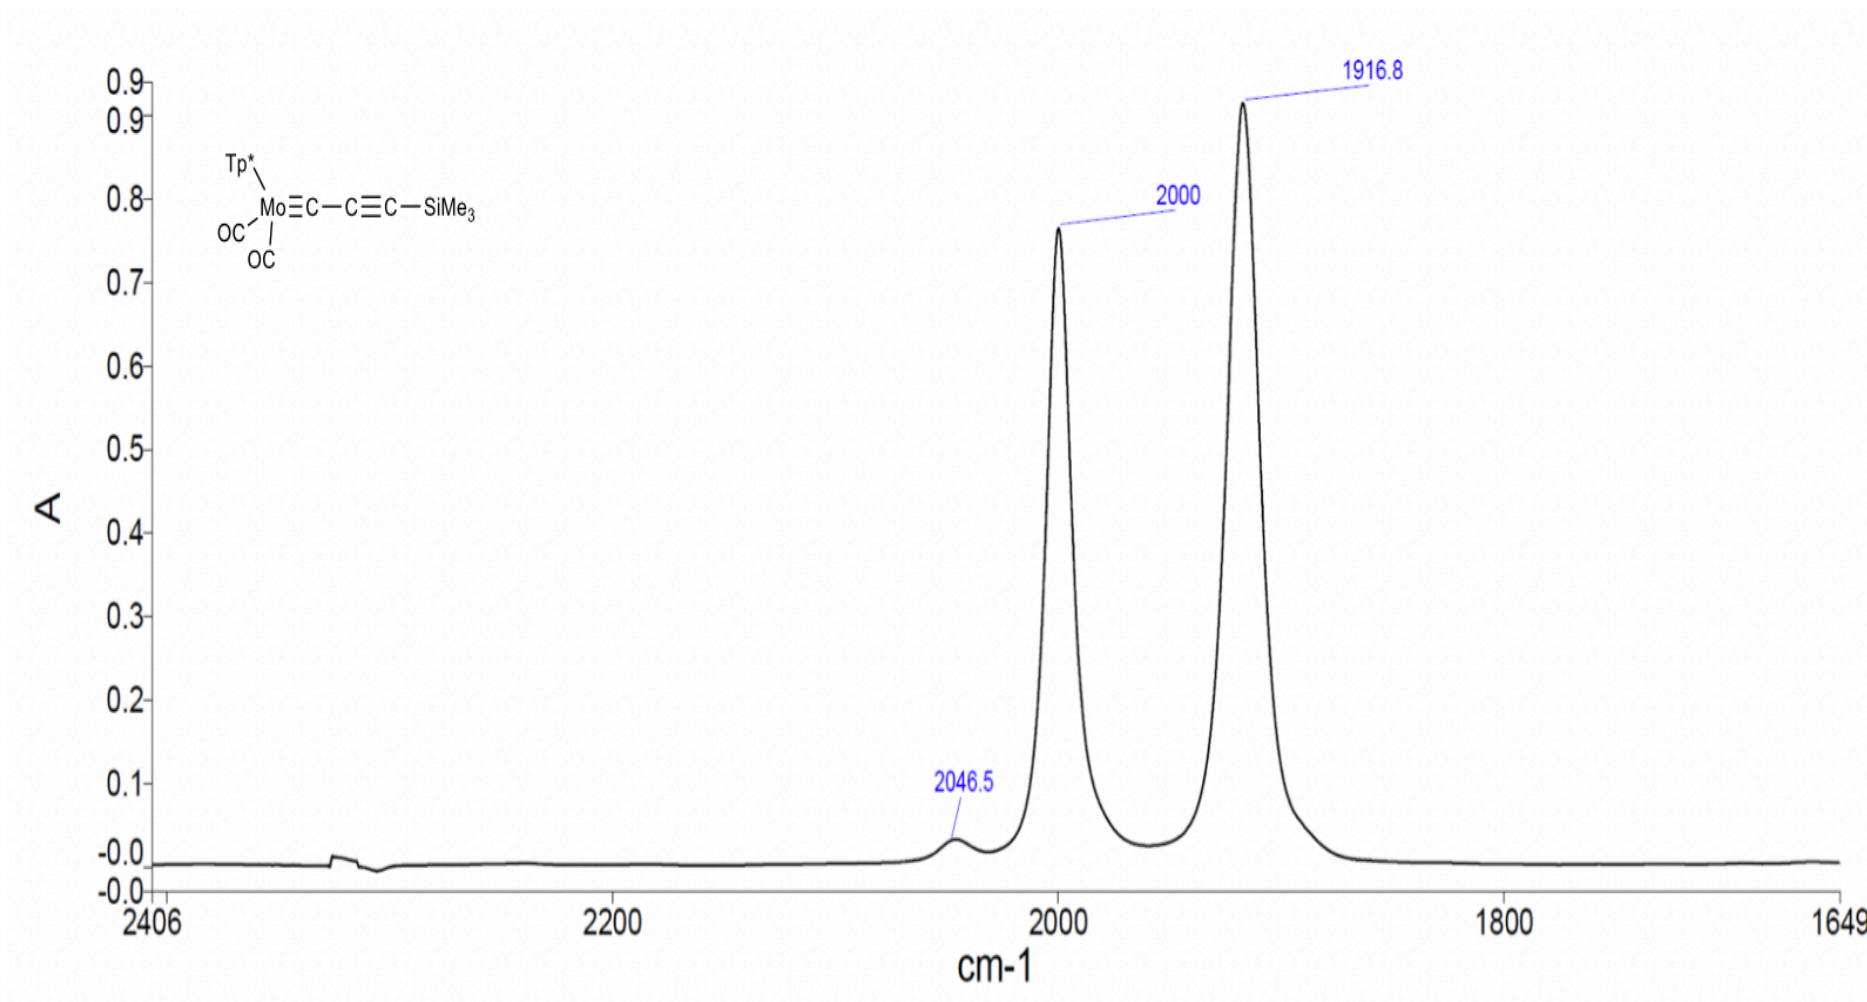

Figure S62. Infrared Spectrum of  $[(\text{Tp}^*)(\text{CO})_2\text{Mo}(\equiv\text{C}-\text{C}\equiv\text{C}-\text{SiMe}_3)]$  (NaCl,  $\text{CH}_2\text{Cl}_2$ , 25 °C)

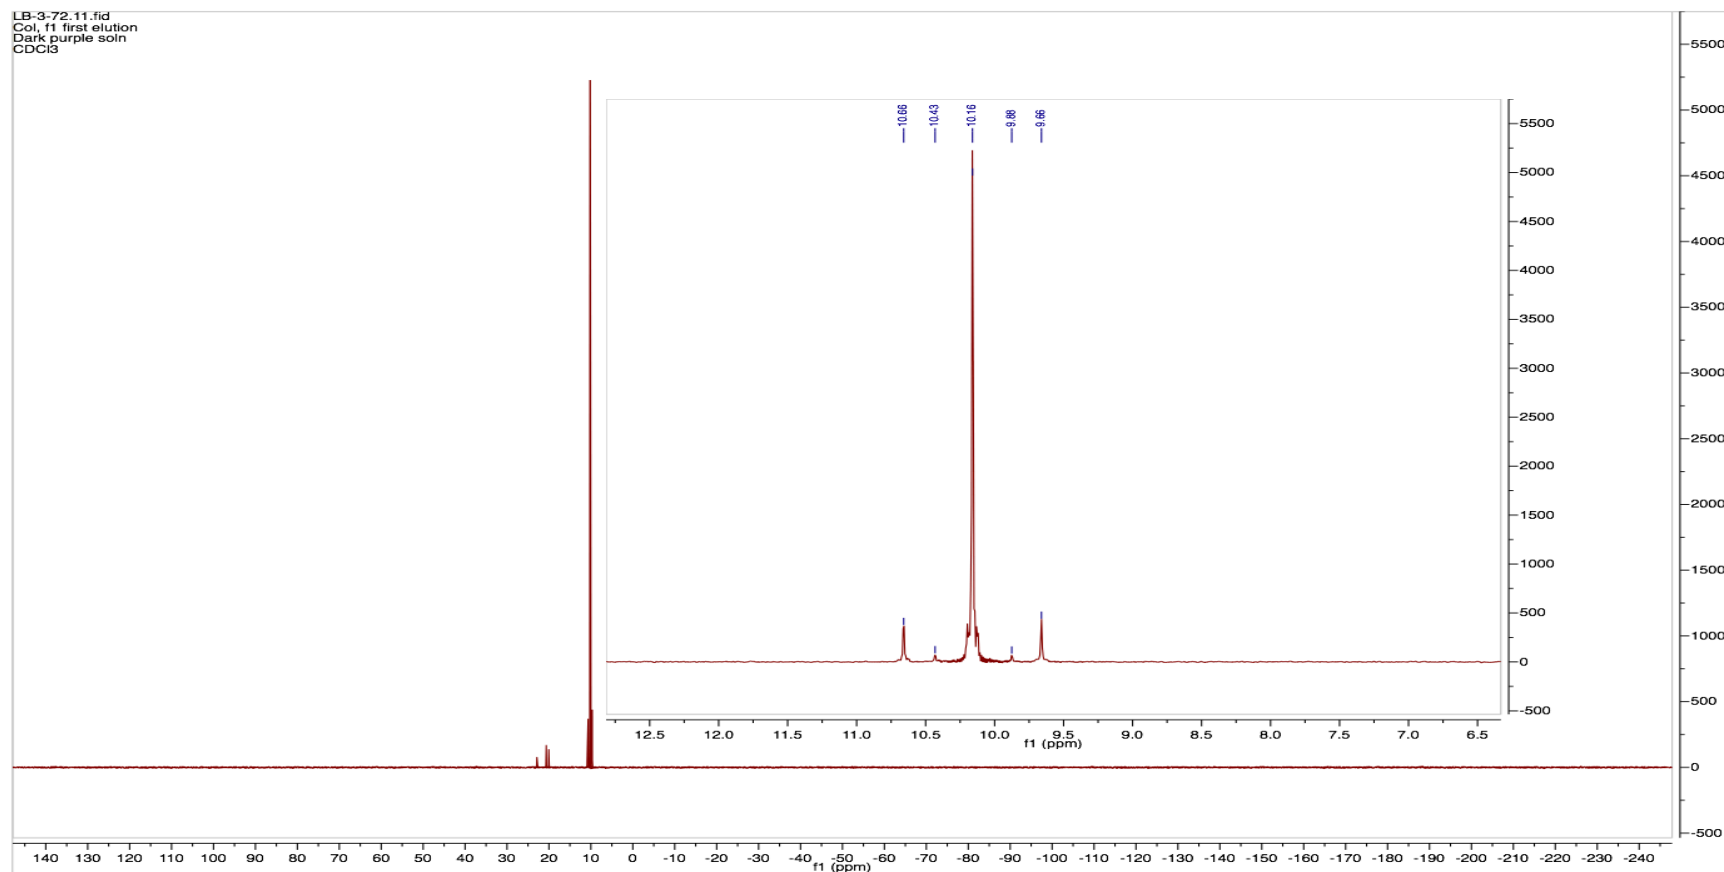

**Figure S63.**  $^{31}\text{P}\{^1\text{H}\}$  NMR Spectrum of  $[\text{W}(\equiv\text{CPh}_3)(\text{CO})_2(\text{Tp}^*)]\text{Br}$  (**[9]Br**) (162 MHz,  $\text{CDCl}_3$ , 25 °C). The salt  $[\text{W}(\equiv\text{CPh}_3)(\text{CO})_2(\text{Tp}^*)]\text{PF}_6$  has been described previously however  $\delta_{\text{P}}$  was not reported.

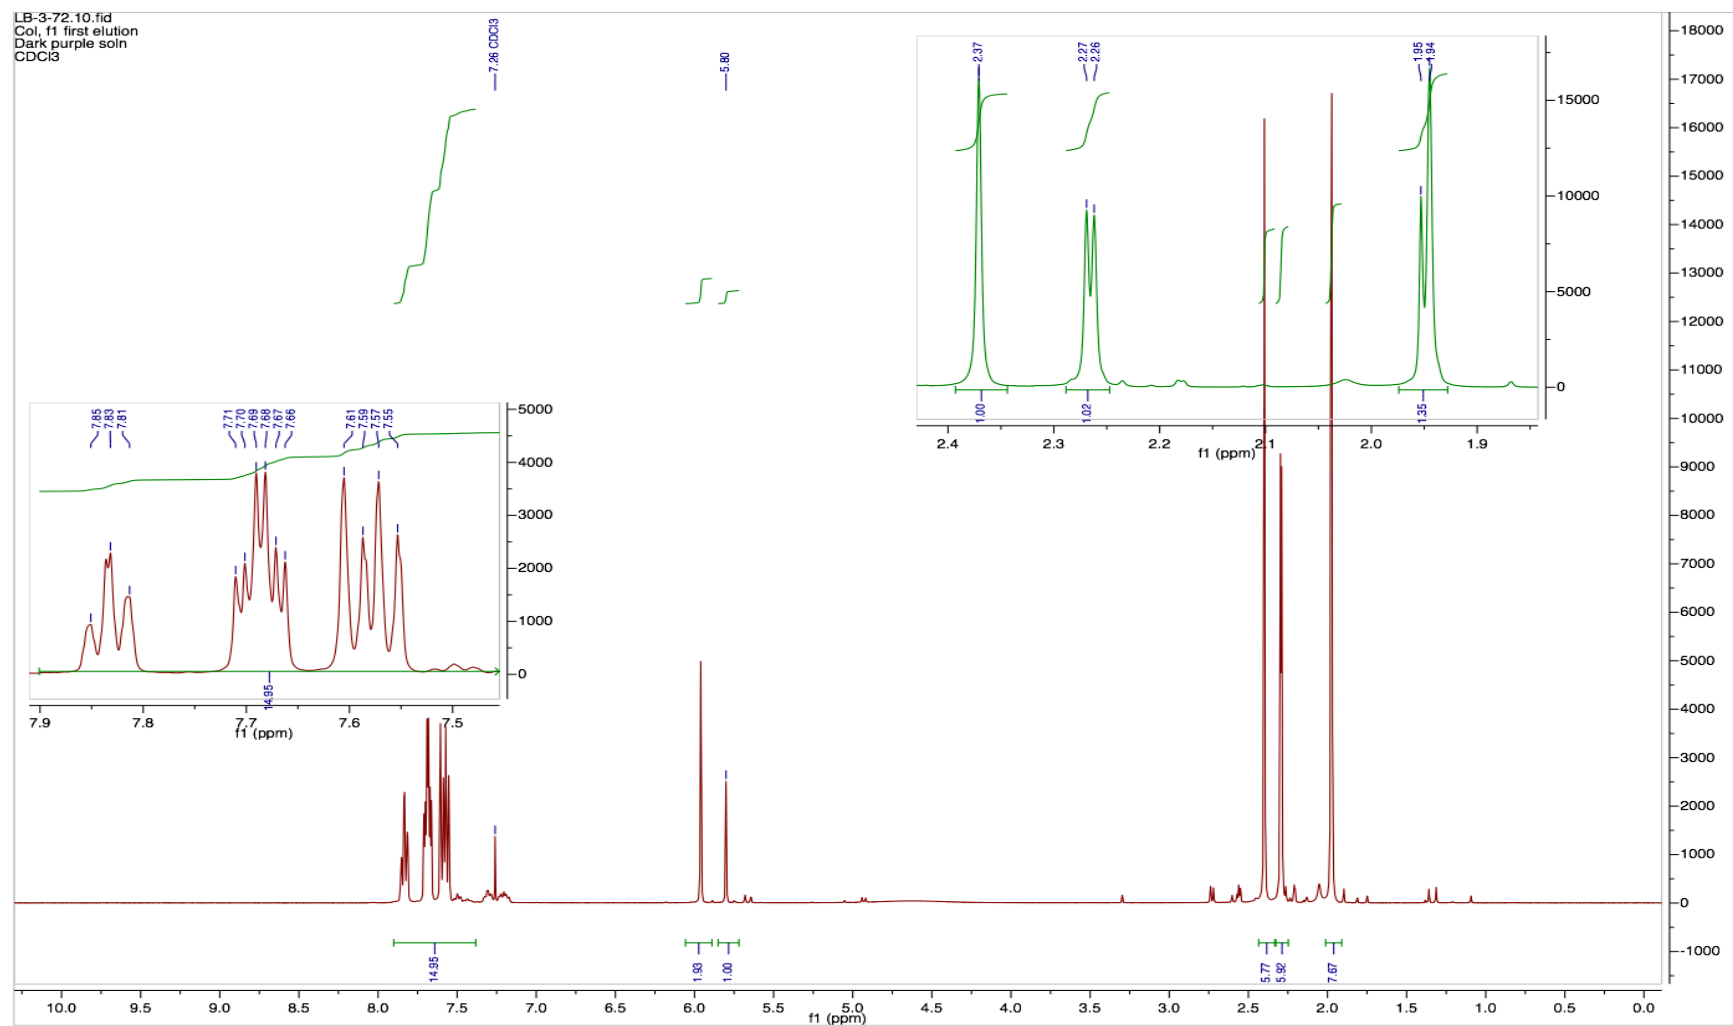

**Figure S64.**  $^1\text{H}$  NMR Spectrum of  $[\text{W}(\equiv\text{CPh}_3)(\text{CO})_2(\text{Tp}^*)]\text{Br}$  ( $[\text{9}]\text{Br}$ ) (400 MHz,  $\text{CDCl}_3$ , 25 °C). The salt  $[\text{W}(\equiv\text{CPh}_3)(\text{CO})_2(\text{Tp}^*)]\text{PF}_6$  has been described previously with  $\delta_{\text{H}}$  ( $\text{CD}_2\text{Cl}_2$ ) = 7.79 (m, 15 H,  $\text{C}_6\text{H}_5$ ), 6.00, 5.86 (pzH), 2.43, 2.34, 2.33, 2.02 (pzCH<sub>3</sub>).



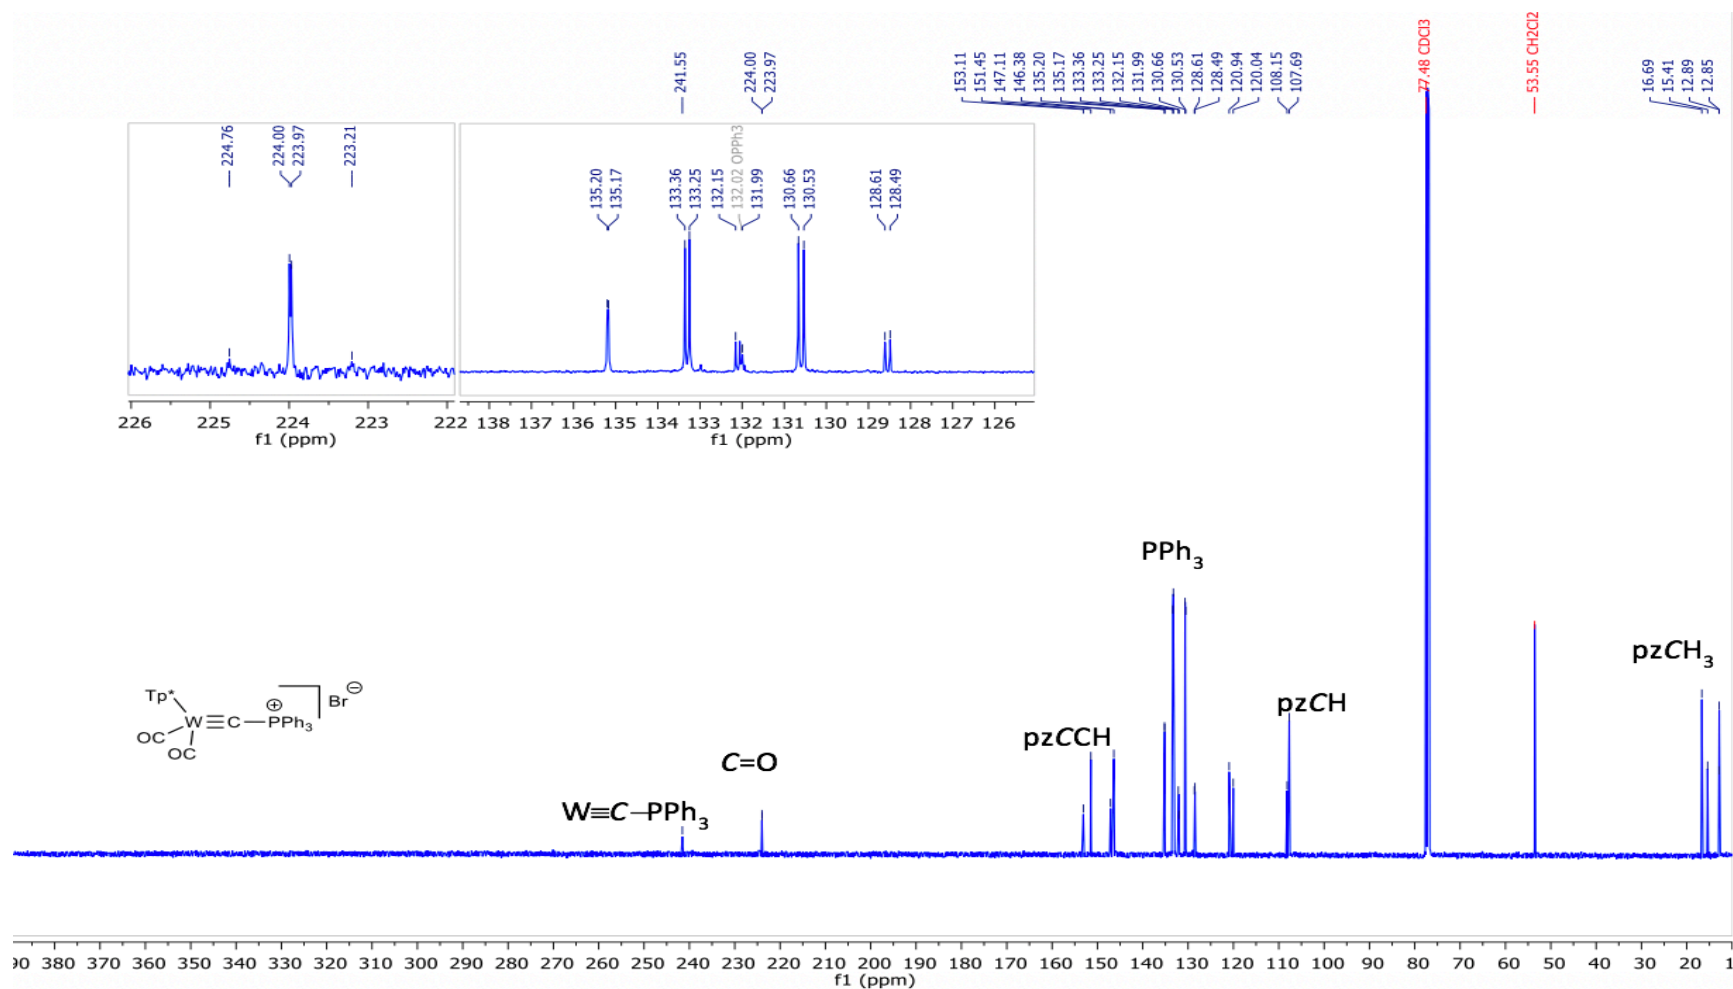

Figure S65.  $^{13}\text{C}$  NMR Spectrum of  $[(\text{Tp}^*)\text{W}(\text{CO})_2(\mu\text{-C})\text{PPh}_3][\text{Br}]$  (100 MHz,  $\text{CDCl}_3$ , 25 °C,  $\delta$ ):

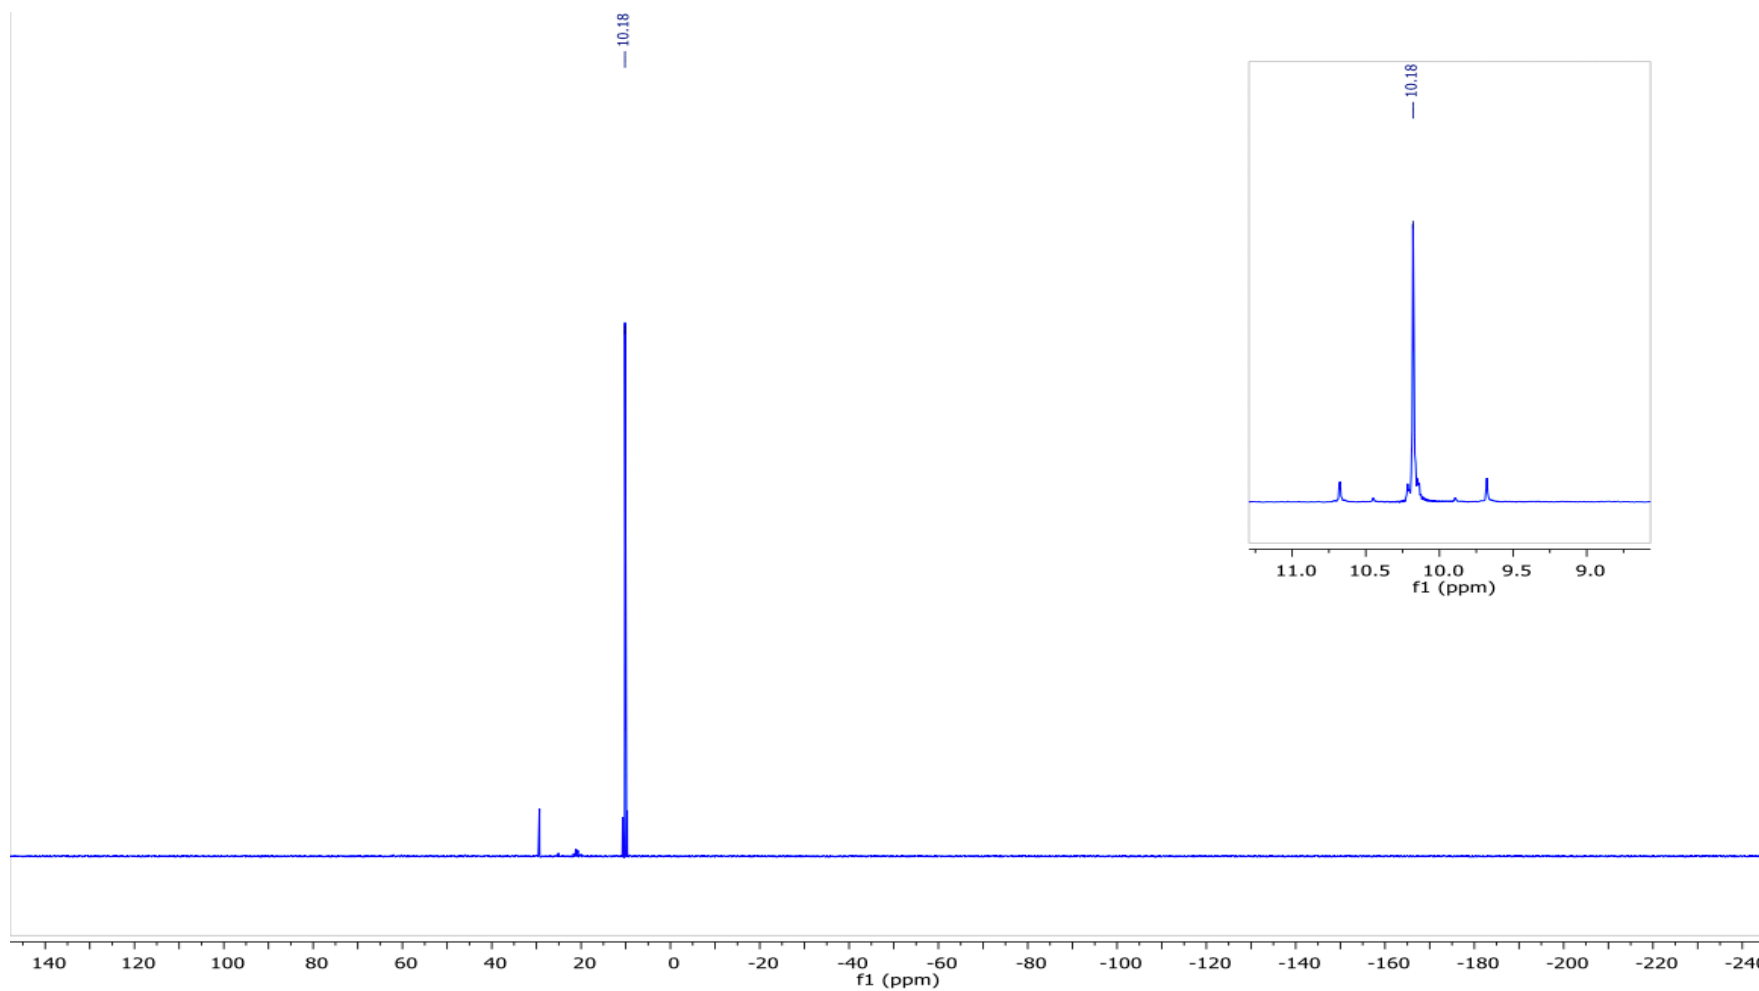

Figure S66.  $^{31}\text{P}$  NMR Spectrum of  $[(\text{Tp}^*)\text{W}(\text{CO})_2(\mu\text{-C})\text{-PPh}_3][\text{Br}]$  (162 MHz,  $\text{CDCl}_3$ , 25 °C,  $\delta$ ):

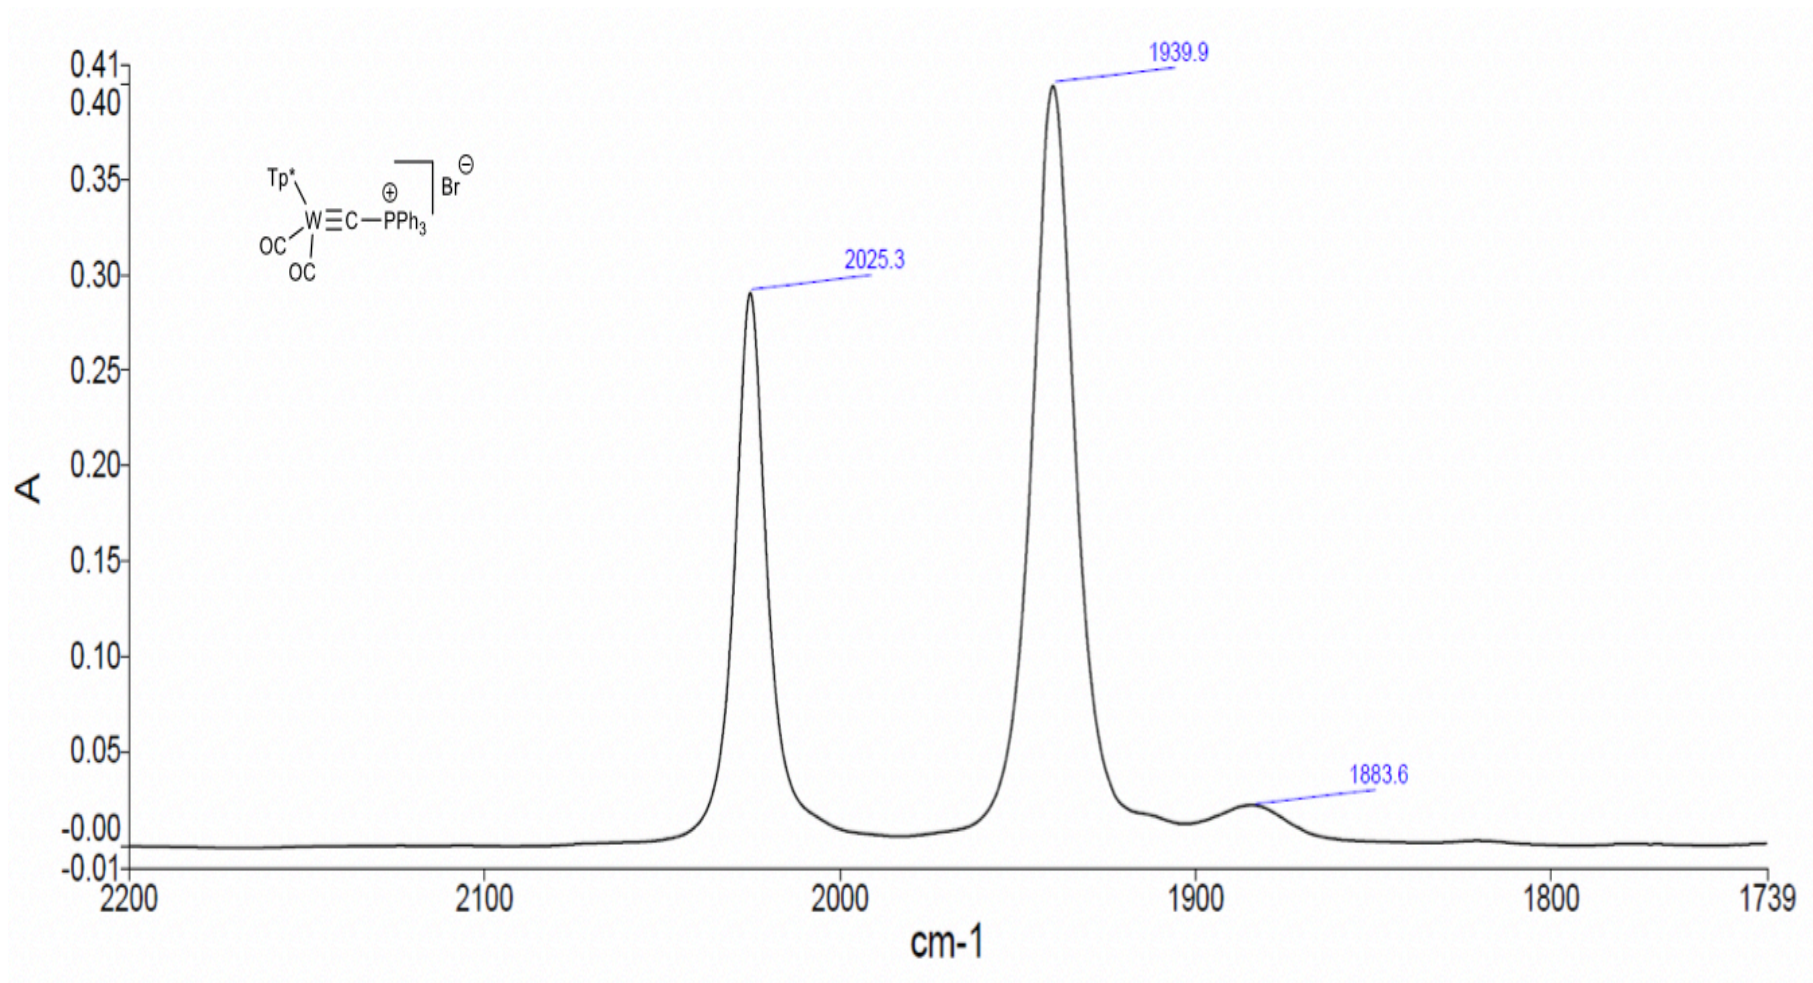

Figure S67. Infrared Spectrum of  $[(\text{Tp}^*)\text{W}(\text{CO}_2)\equiv(\mu\text{-C})\text{-PtBr}(\text{PPh}_3)_2]$  ( $\text{CaF}_2$ ,  $\text{CH}_2\text{Cl}_2$ ,  $25^\circ\text{C}$ ,  $\nu$ ):
